# Supplementary material for: An annotated and illustrated checklist of Microgastrinae wasps (Hymenoptera, Braconidae) from the Canadian Arctic Archipelago and Greenland
Source: Zookeys. 2017 Aug 17;(691):49–101. doi: 10.3897/zookeys.691.14491 (PMC5672697; doi:10.3897/zookeys.691.14491)
Supplement: Supplementary material 1 — Details of all studied specimens of Microgastrinae (Hymenoptera, Braconidae) from the Canadian Arctic Archipelago and Greenland [file zookeys-691-049-s001.xlsx]

## Sheet: 20170609_1497039560fernandeztjE
Taxon	Common name	Voucher Code (SpecimenID Prefix)	Country	Province	Location	Latitude	Longitude	Date	Collector	Method	Depository	Notes
Cotesia Cameron 1891	Cotesia jft09; Cotesia sp. 5 Ellesmere Island Canada	BIOUG09184-B04	Greenland			74.467	-20.567	1 Aug. 2013	T. Roslin et al. leg.		MZH
Cotesia Cameron 1891	Cotesia jft09; Cotesia sp. 5 Ellesmere Island Canada	CNCH0419	Canada	Nunavut	Ellesmere Island, Eureka	79.59	-85.79	31 Jul. 2008			CNC
Cotesia Cameron 1891	Cotesia jft09; Cotesia sp. 5 Ellesmere Island Canada	CNCH0420	Canada	Nunavut	Ellesmere Island, Eureka	79.59	-85.79	31 Jul. 2008			CNC
Cotesia Cameron 1891	Cotesia jft09; Cotesia sp. 5 Ellesmere Island Canada	CNCH0421	Canada	Nunavut	Ellesmere Island, Eureka	79.59	-85.79	31 Jul. 2008			CNC
Cotesia Cameron 1891	Cotesia jft09; Cotesia sp. 5 Ellesmere Island Canada	CNCH0423	Canada	Nunavut	Ellesmere Island, Eureka	79.59	-85.79	31 Jul. 2008			CNC
Cotesia Cameron 1891	Cotesia jft09; Cotesia sp. 5 Ellesmere Island Canada	GOU0519	Canada	Northwest Territories	Banks Island, Sachs Harbour	71.9865	-125.243	22 Jul. 2010	Goulet & Boudreault		CNC
Cotesia Cameron 1891	Cotesia jft09; Cotesia sp. 5 Ellesmere Island Canada	GOU0522	Canada	Northwest Territories	Banks Island, Sachs Harbour	71.9865	-125.243	22 Jul. 2010	Goulet & Boudreault		CNC
Cotesia Cameron 1891	Cotesia jft09; Cotesia sp. 5 Ellesmere Island Canada	GOU0526	Canada	Northwest Territories	Banks Island, Sachs Harbour	71.9865	-125.243	22 Jul. 2010	Goulet & Boudreault		CNC
Cotesia Cameron 1891	Cotesia jft09; Cotesia sp. 5 Ellesmere Island Canada	ZA2009-102	Greenland		Zackenberg Research Station	74.4667	-20.5667		T. Roslin & G. Varkonyi		MZH
Cotesia Cameron 1891	Cotesia jft09; Cotesia sp. 5 Ellesmere Island Canada	ZA2009-103	Greenland		Zackenberg Research Station	74.4667	-20.5667		T. Roslin & G. Varkonyi		MZH
Cotesia Cameron 1891	Cotesia jft09; Cotesia sp. 5 Ellesmere Island Canada	ZA2009-113	Greenland		Zackenberg Research Station	74.4667	-20.5667		T. Roslin & G. Varkonyi		MZH
Cotesia Cameron 1891	Cotesia jft09; Cotesia sp. 5 Ellesmere Island Canada	ZA2011-212	Greenland		Zackenberg Research Station	74.4667	-20.5667		T. Roslin & G. Varkonyi		MZH
Cotesia Cameron 1891	Cotesia jft09; Cotesia sp. 5 Ellesmere Island Canada	ZA2012-4817	Greenland		Northeast	74.5	-21	3 Aug. 2012	Tomas Roslin/ Riikka Kaartinen/ Gergely Varkonyi		MZH
Cotesia Cameron 1891	Cotesia jft09; Cotesia sp. 5 Ellesmere Island Canada	ZA2012-5606	Greenland		Northeast	74.5	-21	18 Aug. 2012	Tomas Roslin/ Riikka Kaartinen/ Gergely Varkonyi		MZH
Cotesia Cameron 1891	Cotesia jft09; Cotesia sp. 5 Ellesmere Island Canada	ZA2013-50000	Greenland		Zackenberg	74.4667	-20.5667	16 Jul. 2013	T. Roslin & G. Varkonyi		MZH
Cotesia Cameron 1891	Cotesia jft09; Cotesia sp. 5 Ellesmere Island Canada	ZA2013-50001	Greenland		Zackenberg	74.4667	-20.5667	16 Jul. 2013	T. Roslin & G. Varkonyi		MZH
Cotesia Cameron 1891	Cotesia sp.	24361-A10	Greenland		Zackenberg	74.4667	-20.5667		M. Tiusanen & T. Roslin		MZH
Cotesia Cameron 1891	Cotesia sp.	24361-A12	Greenland		Zackenberg	74.4667	-20.5667		M. Tiusanen & T. Roslin		MZH
Cotesia Cameron 1891	Cotesia sp.	24361-B09	Greenland		Zackenberg	74.4667	-20.5667		M. Tiusanen & T. Roslin		MZH
Cotesia Cameron 1891	Cotesia sp.	24361-E07	Greenland		Zackenberg	74.4667	-20.5667		M. Tiusanen & T. Roslin		MZH
Cotesia Cameron 1891	Cotesia sp.	24388-C11	Greenland		Zackenberg	74.4667	-20.5667		M. Tiusanen & T. Roslin		MZH
Cotesia Cameron 1891	Cotesia sp.	24391-G12	Greenland		Zackenberg	74.4667	-20.5667		M. Tiusanen & T. Roslin		MZH
Cotesia Cameron 1891	Cotesia sp.	24412-H08	Greenland		Zackenberg	74.4667	-20.5667		M. Tiusanen & T. Roslin		MZH
Cotesia Cameron 1891	Cotesia sp.	24478-E01	Greenland		Zackenberg	74.4667	-20.5667		M. Tiusanen & T. Roslin		MZH
Cotesia Cameron 1891	Cotesia sp.	24523-C12	Greenland		Zackenberg	74.4667	-20.5667		M. Tiusanen & T. Roslin		MZH
Cotesia Cameron 1891	Cotesia sp.	BIOUG15488-A02	Greenland		Trap 7	74.466	-20.597	18 Jul. 2014	T. Roslin et al. leg.		MZH
Cotesia Cameron 1891	Cotesia sp.	ZA2009-100	Greenland		Zackenberg Research Station	74.4667	-20.5667		T. Roslin & G. Varkonyi		MZH
Cotesia Cameron 1891	Cotesia sp.	ZA2010-103	Greenland		Zackenberg Research Station	74.4667	-20.5667		T. Roslin & G. Varkonyi		MZH
Cotesia Cameron 1891	Cotesia sp.	ZA2010-104	Greenland		Zackenberg Research Station	74.4667	-20.5667		T. Roslin & G. Varkonyi		MZH
Cotesia Cameron 1891	Cotesia sp.	ZMUC00023381	Greenland		Zackenberg: Station: 6 B	74.4667	-20.5667	27 Aug. 1997			MZH
Cotesia Cameron 1891	Cotesia sp.	ZMUC00023382	Greenland		Zackenberg: Station: 30	74.4667	-20.5667	20 Aug. 1997			MZH
Cotesia Cameron 1891	Cotesia sp.	ZMUC00023383	Greenland		Coloradodal, Cassiopehede Fgl. 2	71.1667	-23.4	2 Aug. 1994	Jens Boecher		MZH
Cotesia Cameron 1891	Cotesia sp.	ZMUC00023385	Greenland		Jameson Land, Muslingeelvbugt Fgl. 2	71.1667	-23.5	26 Jul. 1994	Jens Boecher		MZH
Cotesia Cameron 1891	Cotesia sp.	ZMUC00023386	Greenland		Skjoldungen Bygden	63.3167	-41.5	19 Jul. 1992	S. Andersen		MZH
Cotesia Cameron 1891	Cotesia sp.	ZMUC00023387	Greenland		Zackenberg: Station 4 A	74.4667	-20.5667	20 Aug. 1997			MZH
Cotesia Cameron 1891	Cotesia sp. 1 Southampton Island Canada	CAM0668	Canada	Nunavut	Southampton Island, Coral Harbour	64.13	-83.16	15 Jun. 1974	B. Green		CNC
Cotesia Cameron 1891	Cotesia sp. 1 Southampton Island Canada	CNC492314	Canada	Nunavut	Southampton Island, Coral Harbour	64.1369	-83.1642	Jun. 1974	Bruce Green		CNC
Cotesia Cameron 1891	Cotesia sp. 1 Southampton Island Canada	CNC492315	Canada	Nunavut	Southampton Island, Coral Harbour	64.1369	-83.1642	Jun. 1974	Bruce Green		CNC
Cotesia Cameron 1891	Cotesia sp. 1 Southampton Island Canada	CNC492316	Canada	Nunavut	Southampton Island, Coral Harbour	64.1369	-83.1642	Jun. 1974	Bruce Green		CNC
Cotesia Cameron 1891	Cotesia sp. 1 Southampton Island Canada	CNC492317	Canada	Nunavut	Southampton Island, Coral Harbour	64.13	-83.16	Jun. 1974	B. Green		CNC
Cotesia Cameron 1891	Cotesia sp. 2 Bylot Island	CAM0574	Canada	Nunavut	Bylot Island	73.1572	-79.9495		L. Jolicoeur		CNC
Cotesia Cameron 1891	Cotesia sp. 3 Banks Island Canada	GOU0520	Canada	Northwest Territories	Banks Island, Sachs Harbour	71.9865	-125.243	22 Jul. 2010	Goulet & Boudreault		CNC
Cotesia Cameron 1891	Cotesia sp. 4 Banks Island Canada	GOU0524	Canada	Northwest Territories	Banks Island, Sachs Harbour	71.9865	-125.243	22 Jul. 2010	Goulet & Boudreault		CNC
Cotesia crassifemorata van Achterberg 2006		CNC703699	Greenland		Umanak	70.674722, -52.126389		9-28 Jul. 1970	P. Volsoe		ZMUC	Specimen not in CNC collection, information extracted from van Achterberg (2006) [The Braconidae (Hymenoptera) of Greenland. Zoologische Mededelingen Leiden. 80-1(2):13-62)].
Cotesia crassifemorata van Achterberg 2006		CNC703701	Greenland		Qapiarfik	69.8667	-50.2333	19 Sep. 1969	C. Vibe		ZMUC	Specimen not in CNC collection, information extracted from van Achterberg (2006) [The Braconidae (Hymenoptera) of Greenland. Zoologische Mededelingen Leiden. 80-1(2):13-62)].
Cotesia crassifemorata van Achterberg 2006		CNC703702	Greenland		Qapiarfik	69.8667	-50.2333	19 Sep. 1969	C. Vibe		RMNH	Specimen not in CNC collection, information extracted from van Achterberg (2006) [The Braconidae (Hymenoptera) of Greenland. Zoologische Mededelingen Leiden. 80-1(2):13-62)].
Cotesia crassifemorata van Achterberg 2006		CNC703703	Greenland		South East, Skjoldungen, Bygden	63.3167	-41.5	19-27 Jul. 1992	S. Anderson		ZMUC
Cotesia crassifemorata van Achterberg 2006		CNC703704	Greenland		Narsarsuaq	61.1	-45.25	20 Jun. 1983	Peter Nielsen		ZMUC	Specimen not in CNC collection, information extracted from van Achterberg (2006) [The Braconidae (Hymenoptera) of Greenland. Zoologische Mededelingen Leiden. 80-1(2):13-62)].
Cotesia crassifemorata van Achterberg 2006		CNC703705	Greenland		Narsarsuaq	61.1	-45.25	20 Jun. 1983	Peter Nielsen		ZMUC	Specimen not in CNC collection, information extracted from van Achterberg (2006) [The Braconidae (Hymenoptera) of Greenland. Zoologische Mededelingen Leiden. 80-1(2):13-62)].
Cotesia crassifemorata van Achterberg 2006		CNC703706	Greenland		Narsarsuaq	61.1	-45.25	20 Jun. 1983	Peter Nielsen		RMNH	Specimen not in CNC collection, information extracted from van Achterberg (2006) [The Braconidae (Hymenoptera) of Greenland. Zoologische Mededelingen Leiden. 80-1(2):13-62)].
Cotesia crassifemorata van Achterberg 2006		CNC703707	Greenland		West Greenland, Godhavn, Osterlien	69.2472	-53.5333	18 Aug. 1972	J. Böcher		ZMUC	Specimen not in CNC collection, information extracted from van Achterberg (2006) [The Braconidae (Hymenoptera) of Greenland. Zoologische Mededelingen Leiden. 80-1(2):13-62)].
Cotesia crassifemorata van Achterberg 2006		CNC703708	Greenland		West Greenland, Godhvn, Osterlien	69.2472	-53.5333	19 Jul. 1969	J. Böcher		ZMUC	Specimen not in CNC collection, information extracted from van Achterberg (2006) [The Braconidae (Hymenoptera) of Greenland. Zoologische Mededelingen Leiden. 80-1(2):13-62)].
Cotesia crassifemorata van Achterberg 2006		CNC703709	Greenland		West Greenland, Godhvn, Osterlien	69.2472	-53.5333	22 Jun. 1968	J. Böcher		ZMUC	Specimen not in CNC collection, information extracted from van Achterberg (2006) [The Braconidae (Hymenoptera) of Greenland. Zoologische Mededelingen Leiden. 80-1(2):13-62)].
Cotesia crassifemorata van Achterberg 2006		CNC703710	Greenland		West Greenland, Godhvn, Osterlien	69.2472	-53.5333	22 Jun. 1968	J. Böcher		ZMUC	Specimen not in CNC collection, information extracted from van Achterberg (2006) [The Braconidae (Hymenoptera) of Greenland. Zoologische Mededelingen Leiden. 80-1(2):13-62)].
Cotesia crassifemorata van Achterberg 2006		CNC703711	Greenland		West Greenland, Godhvn, Osterlien	69.2472	-53.5333	22 Jun. 1968	J. Böcher		ZMUC	Specimen not in CNC collection, information extracted from van Achterberg (2006) [The Braconidae (Hymenoptera) of Greenland. Zoologische Mededelingen Leiden. 80-1(2):13-62)].
Cotesia crassifemorata van Achterberg 2006		CNC703712	Greenland		West Greenland, Godhvn, Osterlien	69.2472	-53.5333	22 Jun. 1968	J. Böcher		RMNH	Specimen not in CNC collection, information extracted from van Achterberg (2006) [The Braconidae (Hymenoptera) of Greenland. Zoologische Mededelingen Leiden. 80-1(2):13-62)].
Cotesia crassifemorata van Achterberg 2006		CNC703713	Greenland		West Greenland, Godhvn, Osterlien	69.2472	-53.5333	22 Jun. 1968	J. Böcher		RMNH	Specimen not in CNC collection, information extracted from van Achterberg (2006) [The Braconidae (Hymenoptera) of Greenland. Zoologische Mededelingen Leiden. 80-1(2):13-62)].
Cotesia crassifemorata van Achterberg 2006		CNC703714	Greenland		West Greenland, Godhvn, Osterlien	69.2472	-53.5333	28 Jun. 1969	J. Böcher		ZMUC	Specimen not in CNC collection, information extracted from van Achterberg (2006) [The Braconidae (Hymenoptera) of Greenland. Zoologische Mededelingen Leiden. 80-1(2):13-62)].
Cotesia crassifemorata van Achterberg 2006		CNC703715	Greenland		West Greenland, Godhvn, Osterlien	69.2472	-53.5333	28 Jun. 1969	J. Böcher		ZMUC	Specimen not in CNC collection, information extracted from van Achterberg (2006) [The Braconidae (Hymenoptera) of Greenland. Zoologische Mededelingen Leiden. 80-1(2):13-62)].
Cotesia crassifemorata van Achterberg 2006		CNC703716	Greenland		West Greenland, Godhvn, Osterlien	69.2472	-53.5333	15 Jul. 1969	J. Böcher		ZMUC
Cotesia crassifemorata van Achterberg 2006		CNC703717	Greenland		West Greenland, Godhvn, Osterlien	69.2472	-53.5333	16 Jul. 1969	J. Böcher		ZMUC	Specimen not in CNC collection, information extracted from van Achterberg (2006) [The Braconidae (Hymenoptera) of Greenland. Zoologische Mededelingen Leiden. 80-1(2):13-62)].
Cotesia crassifemorata van Achterberg 2006		CNC703718	Greenland		West Greenland, Godhvn, Osterlien	69.2472	-53.5333	3 Jul. 1969	J. Böcher		ZMUC	Specimen not in CNC collection, information extracted from van Achterberg (2006) [The Braconidae (Hymenoptera) of Greenland. Zoologische Mededelingen Leiden. 80-1(2):13-62)].
Cotesia crassifemorata van Achterberg 2006		CNC703719	Greenland		West Greenland, Godhvn, Osterlien	69.2472	-53.5333	3 Jul. 1969	J. Böcher		ZMUC	Specimen not in CNC collection, information extracted from van Achterberg (2006) [The Braconidae (Hymenoptera) of Greenland. Zoologische Mededelingen Leiden. 80-1(2):13-62)].
Cotesia crassifemorata van Achterberg 2006		CNC703720	Greenland		West Greenland, Godhvn, Osterlien	69.2472	-53.5333	3 Jul. 1969	J. Böcher		RMNH	Specimen not in CNC collection, information extracted from van Achterberg (2006) [The Braconidae (Hymenoptera) of Greenland. Zoologische Mededelingen Leiden. 80-1(2):13-62)].
Cotesia crassifemorata van Achterberg 2006		CNC703721	Greenland		West Greenland, Godhvn, Osterlien	69.2472	-53.5333	3 Jul. 1969	J. Böcher		RMNH	Specimen not in CNC collection, information extracted from van Achterberg (2006) [The Braconidae (Hymenoptera) of Greenland. Zoologische Mededelingen Leiden. 80-1(2):13-62)].
Cotesia crassifemorata van Achterberg 2006		CNC703722	Greenland		West Greenland, Godhvn, Osterlien	69.2472	-53.5333	8 Jul. 1969	J. Böcher		ZMUC	Specimen not in CNC collection, information extracted from van Achterberg (2006) [The Braconidae (Hymenoptera) of Greenland. Zoologische Mededelingen Leiden. 80-1(2):13-62)].
Cotesia crassifemorata van Achterberg 2006		CNC703723	Greenland		West Greenland, Godhvn, Osterlien	69.2472	-53.5333	8 Jul. 1969	J. Böcher		RMNH	Specimen not in CNC collection, information extracted from van Achterberg (2006) [The Braconidae (Hymenoptera) of Greenland. Zoologische Mededelingen Leiden. 80-1(2):13-62)].
Cotesia crassifemorata van Achterberg 2006		CNC703724	Greenland		West Greenland, Godhvn, Osterlien	69.2472	-53.5333	4 Jul. 1969	J. Böcher		ZMUC	Specimen not in CNC collection, information extracted from van Achterberg (2006) [The Braconidae (Hymenoptera) of Greenland. Zoologische Mededelingen Leiden. 80-1(2):13-62)].
Cotesia eliniae Papp 1989	Cotesia sp.	24412-D08	Greenland		Zackenberg	74.4667	-20.5667		M. Tiusanen & T. Roslin		MZH
Cotesia eliniae Papp 1989	Cotesia sp.	24412-G09	Greenland		Zackenberg	74.4667	-20.5667		M. Tiusanen & T. Roslin		MZH
Cotesia eliniae Papp 1989	Cotesia sp.	24412-G10	Greenland		Zackenberg	74.4667	-20.5667		M. Tiusanen & T. Roslin		MZH
Cotesia eliniae Papp 1989	Cotesia sp.	24523-D01	Greenland		Zackenberg	74.4667	-20.5667		M. Tiusanen & T. Roslin		MZH
Cotesia eliniae Papp 1989	Cotesia sp.	24523-D04	Greenland		Zackenberg	74.4667	-20.5667		M. Tiusanen & T. Roslin		MZH
Cotesia eliniae Papp 1989	Cotesia sp.	BIOUG01044-C08	Greenland		South of ZERO station	74.47	-20.576	22 Jun. 2010	C Rasmussen		BIOUG
Cotesia eliniae Papp 1989	Cotesia sp.	BIOUG01044-C09	Greenland		South of ZERO station	74.47	-20.576	17 Jun. 2010	C Rasmussen		BIOUG
Cotesia eliniae Papp 1989	Cotesia sp.	BIOUG07192-G04	Greenland			74.467	-20.567	28 Jul. 2012	R. Kaartinen, T. Roslin, G. Varkonyi		MZH
Cotesia eliniae Papp 1989	Cotesia sp.	DR201400025	Greenland		Zackenberg	74.4667	-20.5667	30 Jun. 2014	M. Tiusanen & T. Roslin		MZH
Cotesia eliniae Papp 1989	Cotesia sp.	ZA2010-102	Greenland		Zackenberg Research Station	74.4667	-20.5667		T. Roslin & G. Varkonyi		MZH
Cotesia eliniae Papp 1989		CAM0665	Canada	Nunavut	Ellesmere Island, Fosheim Peninsula, Hot Weather Creek	79.967	-84.467	10 Jul. 1991	F. Brodo		CNC
Cotesia eliniae Papp 1989		CAM0667	Canada	Nunavut	Ellesmere Island, Fosheim Peninsula, Hot Weather Creek	79.967	-84.467	10 Jul. 1991	F. Brodo		CNC
Cotesia eliniae Papp 1989		CAM0669	Canada	Nunavut	Ellesmere Island; Ellesmere Island	79.4833	-75.8333	11 Jul. 1980	J. R. Smith		CNC
Cotesia eliniae Papp 1989		CAM0670	Canada	Northwest Territories	Victoria Island; Victoria Island	71.2833	-114	5 Jul. 1975	G & M. Wood		CNC
Cotesia eliniae Papp 1989		CAM0673	Canada	Nunavut	Ellesmere Island, Alexandra Fiord	78.53	-75.55	20 Jul. 1982	O. Kukal		CNC
Cotesia eliniae Papp 1989		CAM0674	Canada	Northwest Territories	Victoria Island; Victoria Island	71.2833	-114	5 Jul. 1975	G & M. Wood		CNC
Cotesia eliniae Papp 1989		CNC497326	Canada	Northwest Territories	Banks Island, Masik River	71.5333	-123.8	28 Jul. 1968	W.R.M. Mason		CNC
Cotesia eliniae Papp 1989		CNC497327	Canada	Northwest Territories	Banks Island, Masik River	71.5333	-123.8	30 Jul. 1968	W.R.M. Mason	pan trap	CNC	on owl perch
Cotesia eliniae Papp 1989		CNC497328	Canada	Northwest Territories	Banks Island, Masik River	71.5333	-123.8	29 Jul. 1968	W.R.M. Mason		CNC	Fox den area
Cotesia eliniae Papp 1989		CNC497329	Canada	Northwest Territories	Banks Island, Masik River	71.5333	-123.8	30 Jul. 1968	W.R.M. Mason		CNC	Fox den area
Cotesia eliniae Papp 1989		CNC497330	Canada	Northwest Territories	Banks Island, Masik River	71.5333	-123.8	29 Jul. 1968	W.R.M. Mason		CNC	Fox den area
Cotesia eliniae Papp 1989		CNC497331	Canada	Northwest Territories	Banks Island, Masik River	71.5333	-123.8	27 Jul. 1968	G.E. Shewell		CNC
Cotesia eliniae Papp 1989		CNC497332	Canada	Northwest Territories	Banks Island, Masik River	71.5333	-123.8	28 Jul. 1968	W.R.M. Mason		CNC
Cotesia eliniae Papp 1989		CNC497333	Canada	Northwest Territories	Banks Island, Masik River	71.5333	-123.8	29 Jul. 1968	W.R.M. Mason	pan trap	CNC	pan trap on ground
Cotesia eliniae Papp 1989		CNC497334	Canada	Northwest Territories	Banks Island, Masik River	71.5333	-123.8	31 Jul. 1968	W.R.M. Mason	pan trap	CNC	pan trap on ground E
Cotesia eliniae Papp 1989		CNC497335	Canada	Northwest Territories	Banks Island, Masik River	71.5333	-123.8	27 Jul. 1968	G.E. Shewell		CNC
Cotesia eliniae Papp 1989		CNC497336	Canada	Northwest Territories	Banks Island, Masik River	71.5333	-123.8	31 Jul. 1968	W.R.M. Mason	Malaise trap	CNC	Malaise Trap 1
Cotesia eliniae Papp 1989		CNC497337	Canada	Northwest Territories	Banks Island, Masik River	71.5333	-123.8	31 Jul. 1968	W.R.M. Mason	Malaise trap	CNC	Malaise Trap 1
Cotesia eliniae Papp 1989		CNC497338	Canada	Northwest Territories	Banks Island, Masik River	71.5333	-123.8	31 Jul. 1968	W.R.M. Mason	Malaise trap	CNC	Malaise Trap 1
Cotesia eliniae Papp 1989		CNC497339	Canada	Northwest Territories	Ellesmere Island, Hazen Camp R.	81.8167	-71.2667	28 Jun. 1962	R.B. Madge		CNC
Cotesia eliniae Papp 1989		CNC497340	Canada	Northwest Territories	Banks Island, Masik River	71.5333	-123.8	29 Jul. 1968	W.R.M. Mason	pan trap	CNC	pan trap on ground
Cotesia eliniae Papp 1989		CNC497341	Canada	Northwest Territories	Victoria Island	71.2833	-114	11-15 Jul. 1975	G. & M. Wood		CNC
Cotesia eliniae Papp 1989		CNC497342	Canada	Nunavut	Ellesmere Island, Alexandra Fiord	78.53	-75.55	2-10 Jul. 1982	Olga Kukal	pan trap	CNC	Pantraps H
Cotesia eliniae Papp 1989		CNC497343	Canada	Nunavut	Ellesmere Island, Alexandra Fiord	78.53	-75.55	16 Jun.-2 Jul. 1982	Olga Kukal	pan trap	CNC	Pantraps B
Cotesia eliniae Papp 1989		CNC497344	Canada	Northwest Territories	Banks Island, Masik River	71.5333	-123.8	29 Jul. 1968	W.R.M. Mason		CNC	Fox den area
Cotesia eliniae Papp 1989		CNC497345	Canada	Nunavut	Ellesmere Island, Alexandra Fiord	78.53	-75.55	2-10 Jul. 1982	Olga Kukal	pan trap	CNC	Pantraps H
Cotesia eliniae Papp 1989		CNC497346	Canada	Nunavut	Ellesmere Island, Alexandra Fiord	78.53	-75.55	2-10 Jul. 1982	Olga Kukal	pan trap	CNC	Pantraps H
Cotesia eliniae Papp 1989		CNC497347	Canada	Nunavut	Ellesmere Island, Alexandra Fiord	78.53	-75.55	2-10 Jul. 1982	Olga Kukal	pan trap	CNC	Pantraps H
Cotesia eliniae Papp 1989		CNC497348	Canada	Nunavut	Ellesmere Island, Alexandra Fiord	78.53	-75.55	2-10 Jul. 1982	Olga Kukal	pan trap	CNC	Pantraps H
Cotesia eliniae Papp 1989		CNC497349	Canada	Nunavut	Ellesmere Island, Alexandra Fiord	78.53	-75.55	9 Jul. 1981	Olga Kukal	pan trap	CNC	collecting year could be 1981 or 1982
Cotesia eliniae Papp 1989		CNC497350	Canada	Nunavut	Ellesmere Island, Alexandra Fiord	78.53	-75.55	2-10 Jul. 1982	Olga Kukal	pan trap	CNC	Pantraps H
Cotesia eliniae Papp 1989		CNC497351	Canada	Nunavut	Ellesmere Island, Alexandra Fiord	78.53	-75.55	20 Jul.-3 Aug. 1982	Olga Kukal	pan trap	CNC	Pantraps H
Cotesia eliniae Papp 1989		CNC497352	Canada	Nunavut	Ellesmere Island, Alexandra Fiord	78.53	-75.55	2-10 Jul. 1982	Olga Kukal	pan trap	CNC	Pantraps H
Cotesia eliniae Papp 1989		CNC497353	Canada	Nunavut	Ellesmere Island, Alexandra Fiord	78.53	-75.55	20 Jul.-3 Aug. 1982	Olga Kukal	pan trap	CNC	Pantraps H
Cotesia eliniae Papp 1989		CNC497354	Canada	Nunavut	Ellesmere Island, Alexandra Fiord	78.53	-75.55	16 Jun.-2 Jul. 1982	Olga Kukal	pan trap	CNC	Pantraps B
Cotesia eliniae Papp 1989		CNC497355	Canada	Nunavut	Ellesmere Island, Alexandra Fiord	78.53	-75.55	2-10 Jul. 1982	Olga Kukal	pan trap	CNC	Pantraps H
Cotesia eliniae Papp 1989		CNC497356	Canada	Nunavut	Ellesmere Island, Alexandra Fiord	78.53	-75.55	29 Jun. 1981	Olga Kukal	pan trap	CNC	collecting year could be 1981 or 1982
Cotesia eliniae Papp 1989		CNC497357	Canada	Nunavut	Ellesmere Island, Alexandra Fiord	78.53	-75.55	2-10 Jul. 1982	Olga Kukal	pan trap	CNC
Cotesia eliniae Papp 1989		CNC497358	Canada	Nunavut	Ellesmere Island, Alexandra Fiord	78.53	-75.55	2-10 Jul. 1982	Olga Kukal	pan trap	CNC	Pantraps H
Cotesia eliniae Papp 1989		CNC497359	Canada	Nunavut	Ellesmere Island, Alexandra Fiord	78.53	-75.55	11-20 Jul. 1982	Olga Kukal	pan trap	CNC	Pantraps B
Cotesia eliniae Papp 1989		CNC497360	Canada	Nunavut	Ellesmere Island, Alexandra Fiord	78.53	-75.55	11-20 Jul. 1982	Olga Kukal		CNC	Pantraps H
Cotesia eliniae Papp 1989		CNC497361	Canada	Nunavut	Ellesmere Island, Alexandra Fiord	78.53	-75.55	2-10 Jul. 1982	Olga Kukal	pan trap	CNC	Pantraps H
Cotesia eliniae Papp 1989		CNC497362	Canada	Nunavut	Devon Island	75	-85	Jul. 1971	J. Ryan & C. Hergert	pitfall trap	CNC	I.B.P. Project
Cotesia eliniae Papp 1989		CNC497363	Canada	Northwest Territories	Victoria Island	71.2833	-114	23-28 Jul. 1975	G. & M. Wood		CNC
Cotesia eliniae Papp 1989		CNC497364	Canada	Nunavut	Ellesmere Island, Alexandra Fiord	78.53	-75.55	16 Jun.-2 Jul. 1982	Olga Kukal	pan trap	CNC	Pantraps B
Cotesia eliniae Papp 1989		CNC497365	Canada	Nunavut	Ellesmere Island, Alexandra Fiord	78.53	-75.55	20 Jul.-3 Aug. 1982	Olga Kukal	pan trap	CNC	Pantraps H
Cotesia eliniae Papp 1989		CNC497366	Canada	Nunavut	Ellesmere Island, Alexandra Fiord	78.53	-75.55	2-10 Jul. 1982	Olga Kukal	pan trap	CNC	Pantraps S
Cotesia eliniae Papp 1989		CNC497367	Canada	Nunavut	Ellesmere Island, Alexandra Fiord	78.53	-75.55	2-10 Jul. 1982	Olga Kukal	pan trap	CNC	Pantraps S
Cotesia eliniae Papp 1989		CNC497368	Canada	Nunavut	Ellesmere Island, Alexandra Fiord	78.53	-75.55	11-20 Jul. 1982	Olga Kukal	pan trap	CNC	Pantraps H
Cotesia eliniae Papp 1989		CNC497369	Canada	Nunavut	Ellesmere Island, Alexandra Fiord	78.53	-75.55	2-10 Jul. 1982	Olga Kukal	pan trap	CNC	Pantraps S
Cotesia eliniae Papp 1989		CNC497370	Canada	Nunavut	Ellesmere Island, Hazen Camp	81.8167	-71.3	6 Aug. 1962	R.B. Madge		CNC
Cotesia eliniae Papp 1989		CNC497371	Canada	Nunavut	Ellesmere Island, Hazen Camp	81.8167	-71.3	19 Jun. 1962	J. F. McAlpine		CNC
Cotesia eliniae Papp 1989		CNC497372	Canada	Nunavut	Ellesmere Island, Hazen Camp R.	81.8167	-71.3	10 Jul. 1962	R.B. Madge		CNC
Cotesia eliniae Papp 1989		CNC497373	Canada	Nunavut	Ellesmere Island, Hazen Camp	81.8167	-71.3	19 Jun. 1962	J. F. McAlpine		CNC
Cotesia eliniae Papp 1989		CNC497374	Canada	Nunavut	Ellesmere Island, Hazen Camp R.	81.8167	-71.3	11 Jul. 1962	R.B. Madge		CNC
Cotesia eliniae Papp 1989		CNC497375	Canada	Nunavut	Ellesmere Island, Hazen Camp R.	81.8167	-71.3	5 Jul. 1962	R.B. Madge		CNC
Cotesia eliniae Papp 1989		CNC497376	Canada	Nunavut	Ellesmere Island	79.4833	-75.8333	4 Jul. 1980	J.R. Smith		CNC	JSEPMB
Cotesia eliniae Papp 1989		CNC497377	Canada	Nunavut	Ellesmere Island	79.4833	-75.8333	11 Jul. 1980	J.R. Smith		CNC	JSEPMB
Cotesia eliniae Papp 1989		CNC497378	Canada	Nunavut	Ellesmere Island	79.4833	-75.8333	11 Jul. 1980	J.R. Smith		CNC	JSEPMB
Cotesia eliniae Papp 1989		CNC497379	Canada	Nunavut	Ellesmere Island	79.4833	-75.8333	11 Jul. 1980	J.R. Smith		CNC	JSEPMB
Cotesia eliniae Papp 1989		CNC497380	Canada	Nunavut	Ellesmere Island	79.4833	-75.8333				CNC	Label image not uploaded yet into the database
Cotesia eliniae Papp 1989		CNC497381	Canada	Northwest Territories	Victoria Island	71.2833	-114	11-15 Jul. 1975	G. & M. Wood		CNC
Cotesia eliniae Papp 1989		CNC497382	Canada	Northwest Territories	Victoria Island	71.2833	-114	11-15 Jul. 1976	G. & M. Wood		CNC
Cotesia eliniae Papp 1989		CNC497383	Canada	Northwest Territories	Victoria Island	71.2833	-114	11-15 Jul. 1977	G. & M. Wood		CNC
Cotesia eliniae Papp 1989		CNC497384	Canada	Northwest Territories	Victoria Island	71.2833	-114	11-15 Jul. 1978	G. & M. Wood		CNC
Cotesia eliniae Papp 1989		CNC497385	Canada	Northwest Territories	Victoria Island	71.2833	-114	11-15 Jul. 1979	G. & M. Wood		CNC
Cotesia eliniae Papp 1989		CNC497386	Canada	Northwest Territories	Victoria Island	71.2833	-114	11-15 Jul. 1980	G. & M. Wood		CNC
Cotesia eliniae Papp 1989		CNC497387	Canada	Northwest Territories	Victoria Island	71.2833	-114	11-15 Jul. 1981	G. & M. Wood		CNC
Cotesia eliniae Papp 1989		CNC497388	Canada	Northwest Territories	Victoria Island	71.2833	-114	11-15 Jul. 1982	G. & M. Wood		CNC
Cotesia eliniae Papp 1989		CNC497389	Canada	Northwest Territories	Victoria Island	71.2833	-114	23-28 Jul. 1975	G. & M. Wood	pan trap	CNC	pan traps in sedge meadow
Cotesia eliniae Papp 1989		CNC497390	Canada	Northwest Territories	Victoria Island	71.2833	-114	23-28 Jul. 1975	G. & M. Wood		CNC
Cotesia eliniae Papp 1989		CNC497391	Canada	Northwest Territories	Victoria Island	71.2833	-114	1-5 Jul. 1975	G. & M. Wood		CNC
Cotesia eliniae Papp 1989		CNC497392	Canada	Northwest Territories	Victoria Island	71.2833	-114	1-5 Jul. 1975	G. & M. Wood		CNC
Cotesia eliniae Papp 1989		CNC497393	Canada	Northwest Territories	Victoria Island	71.2833	-114	1-5 Jul. 1975	G. & M. Wood		CNC
Cotesia eliniae Papp 1989		CNC497394	Canada	Northwest Territories	Victoria Island	71.2833	-114	1-5 Jul. 1975	G. & M. Wood		CNC
Cotesia eliniae Papp 1989		CNC497395	Canada	Northwest Territories	Victoria Island	71.2833	-114	23-28 Jul. 1975	G. & M. Wood		CNC
Cotesia eliniae Papp 1989		CNC497396	Canada	Northwest Territories	Victoria Island	71.2833	-114	1-5 Jul. 1975	G. & M. Wood		CNC
Cotesia eliniae Papp 1989		CNC497397	Canada	Northwest Territories	Victoria Island	71.2833	-114	1-5 Jul. 1975	G. & M. Wood		CNC
Cotesia eliniae Papp 1989		CNC497398	Canada	Northwest Territories	Victoria Island	71.2833	-114	1-5 Jul. 1976	G. & M. Wood		CNC
Cotesia eliniae Papp 1989		CNC497399	Canada	Northwest Territories	Victoria Island	71.2833	-114	1-5 Jul. 1976	G. & M. Wood		CNC
Cotesia eliniae Papp 1989		CNC497400	Canada	Northwest Territories	Victoria Island	71.2833	-114	1-5 Jul. 1976	G. & M. Wood		CNC
Cotesia eliniae Papp 1989		CNC497401	Canada	Nunavut	Ellesmere Island, Alexandra Fiord	78.53	-75.55	2-10 Jul. 1982	Olga Kukal	pan trap	CNC	Pantraps H
Cotesia eliniae Papp 1989		CNC497402	Canada	Nunavut	Ellesmere Island, Alexandra Fiord	78.53	-75.55	2-10 Jul. 1982	Olga Kukal	pan trap	CNC	Pantraps H
Cotesia eliniae Papp 1989		CNC497403	Canada	Nunavut	Ellesmere Island, Alexandra Fiord	78.53	-75.55	2-10 Jul. 1982	Olga Kukal	pan trap	CNC	Pantraps H
Cotesia eliniae Papp 1989		CNC497404	Canada	Nunavut	Ellesmere Island, Fosheim Peninsula, Hot Weather Creek	79.9667	-84.4667	10 Jul. 1990	F. Brodo		CNC	Picnic Lake
Cotesia eliniae Papp 1989		CNC497405	Canada	Nunavut	Ellesmere Island, Alexandra Fiord	78.53	-75.55	2 Jul. 1981	Olga Kukal	pan trap	CNC	collecting year could be 1981 or 1982
Cotesia eliniae Papp 1989		CNC497406	Canada	Northwest Territories	Banks Island, Masik River	71.5333	-123.8	31 Jul. 1968	W.R.M. Mason	Malaise trap	CNC	Malaise Trap 1
Cotesia eliniae Papp 1989		CNC497407	Canada	Nunavut	Ellesmere Island, Alexandra Fiord	78.53	-75.55	20 Jul.-3 Aug. 1982	Olga Kukal	pan trap	CNC	Pantraps H
Cotesia eliniae Papp 1989		CNC497408	Canada	Nunavut	Ellesmere Island, Alexandra Fiord	78.53	-75.55	11-20 Jul. 1982	Olga Kukal	pan trap	CNC	Pantraps H
Cotesia eliniae Papp 1989		CNC497409	Canada	Nunavut	Ellesmere Island, Alexandra Fiord	78.53	-75.55	11-20 Jul. 1982	Olga Kukal	pan trap	CNC	Pantraps H
Cotesia eliniae Papp 1989		CNC497410	Canada	Nunavut	Ellesmere Island, Alexandra Fiord	78.53	-75.55	11-20 Jul. 1982	Olga Kukal	pan trap	CNC	Pantraps S
Cotesia eliniae Papp 1989		CNC497411	Canada	Nunavut	Ellesmere Island, Alexandra Fiord	78.53	-75.55	29 Jun. 1981	Olga Kukal	pan trap	CNC	collecting year could be 1981 or 1982
Cotesia eliniae Papp 1989		CNC497412	Canada	Nunavut	Ellesmere Island, Hazen Camp	81.8167	-71.3	25 Jul. 1962	R.B. Madge		CNC
Cotesia eliniae Papp 1989		CNC497413	Canada	Nunavut	Ellesmere Island, Hazen Camp R.	81.8167	-71.3	25 Jun. 1962	R.B. Madge		CNC
Cotesia eliniae Papp 1989		CNC497414	Canada	Nunavut	Ellesmere Island, Hazen Camp	81.8167	-71.3	19 Jul. 1963	R.E. Leech		CNC	TR31
Cotesia eliniae Papp 1989		CNC497415	Canada	Northwest Territories	Melville Island, Bailey Point	75	-115	25 Jul. 1965	J.E.H. Martin		CNC
Cotesia eliniae Papp 1989		CNC703725	Greenland		Scoresby Sound	70.75	-25.5	4 Aug. 1985	D. Elin		HNHM	Specimen not in CNC collection, information extracted from van Achterberg (2006) [The Braconidae (Hymenoptera) of Greenland. Zoologische Mededelingen Leiden. 80-1(2):13-62)].
Cotesia eliniae Papp 1989		CNC703726	Greenland		Coloradodal, Cassiopehede, Fgl. 2	71.1667	-23.4	2 Aug. 1994	J. Böcher		ZMUC	Specimen not in CNC collection, information extracted from van Achterberg (2006) [The Braconidae (Hymenoptera) of Greenland. Zoologische Mededelingen Leiden. 80-1(2):13-62)].
Cotesia eliniae Papp 1989		CNC703727	Greenland		Coloradodal, Cassiopehede, Flg. 2	71.1667	-23.4	2 Aug. 1994	J. Böcher		ZMUC	Specimen not in CNC collection, information extracted from van Achterberg (2006) [The Braconidae (Hymenoptera) of Greenland. Zoologische Mededelingen Leiden. 80-1(2):13-62)].
Cotesia eliniae Papp 1989		CNC703728	Greenland		Eskimonaes, Kratlien			1933-05-29	J. Braendegaard		ZMUC	Specimen not in CNC collection, information extracted from van Achterberg (2006) [The Braconidae (Hymenoptera) of Greenland. Zoologische Mededelingen Leiden. 80-1(2):13-62)].
Cotesia eliniae Papp 1989		CNC703729	Greenland		Eskimonaes, Kratlien			1933-05-29	J. Braendegaard		ZMUC	Specimen not in CNC collection, information extracted from van Achterberg (2006) [The Braconidae (Hymenoptera) of Greenland. Zoologische Mededelingen Leiden. 80-1(2):13-62)].
Cotesia eliniae Papp 1989		CNC703730	Greenland		Eskimonaes, Kratlien			1933-05-29	J. Braendegaard		ZMUC	Specimen not in CNC collection, information extracted from van Achterberg (2006) [The Braconidae (Hymenoptera) of Greenland. Zoologische Mededelingen Leiden. 80-1(2):13-62)].
Cotesia eliniae Papp 1989		CNC703731	Greenland		Eskimonaes, Kratlien			1933-05-29	J. Braendegaard		ZMUC	Specimen not in CNC collection, information extracted from van Achterberg (2006) [The Braconidae (Hymenoptera) of Greenland. Zoologische Mededelingen Leiden. 80-1(2):13-62)].
Cotesia eliniae Papp 1989		CNC703732	Greenland		Eskimonaes, Kratlien			1933-05-29	J. Braendegaard		RMNH	Specimen not in CNC collection, information extracted from van Achterberg (2006) [The Braconidae (Hymenoptera) of Greenland. Zoologische Mededelingen Leiden. 80-1(2):13-62)].
Cotesia eliniae Papp 1989		CNC703733	Greenland		Eskimonaes, Kratlien			1933-05-29	J. Braendegaard		ZMUC	Specimen not in CNC collection, information extrcted from van Achterberg (2006) [The Braconidae (Hymenoptera) of Greenland. Zoologische Mededelingen Leiden. 80-1(2):13-62)]. Text written in Danish(?) reads: ”Puppun fandtes fastkl. paa en Sten, 11.vi.[1993] fandtes de udkl. Hvepse dode. Den 3 aarige Østgrønl. Exped.”
Cotesia eliniae Papp 1989		CNC703734	Greenland		Godtaab, Sommertogl 1932, Nordfjord			29 Jul. 1932	J. Braendegaard		ZMUC	Specimen not in CNC collection, information extracted from van Achterberg (2006) [The Braconidae (Hymenoptera) of Greenland. Zoologische Mededelingen Leiden. 80-1(2):13-62)].
Cotesia eliniae Papp 1989		CNC703735	Greenland		South-East of Greenland, Skjoldungen, Bygden			19-27 Jul. 1992	S. Anderson		RMNH	Specimen not in CNC collection, information extracted from van Achterberg (2006) [The Braconidae (Hymenoptera) of Greenland. Zoologische Mededelingen Leiden. 80-1(2):13-62)].
Cotesia eliniae Papp 1989		CNC703736	Greenland		North-East of Greenland, Zackenberg	74.4667	-20.5667	1 Aug. 1991	J. Böcher		ZMUC	Specimen not in CNC collection, information extracted from van Achterberg (2006) [The Braconidae (Hymenoptera) of Greenland. Zoologische Mededelingen Leiden. 80-1(2):13-62)].
Cotesia eliniae Papp 1989		CNC703737	Greenland		North-East of Greenland, Zackenberg	74.4667	-20.5667	1 Aug. 1991	J. Böcher		RMNH	Specimen not in CNC collection, information extracted from van Achterberg (2006) [The Braconidae (Hymenoptera) of Greenland. Zoologische Mededelingen Leiden. 80-1(2):13-62)].
Cotesia eliniae Papp 1989		CNC703738	Greenland		North-East of Greenland, Zackenberg	74.4667	-20.5667	1 Aug. 1991	J. Böcher		RMNH	Specimen not in CNC collection, information extracted from van Achterberg (2006) [The Braconidae (Hymenoptera) of Greenland. Zoologische Mededelingen Leiden. 80-1(2):13-62)].
Cotesia eliniae Papp 1989		CNC703739	Greenland		Nordostgronlamd, Ella Ø			Jul. 1958	C. Vibe		RMNH	Specimen not in CNC collection, information extracted from van Achterberg (2006) [The Braconidae (Hymenoptera) of Greenland. Zoologische Mededelingen Leiden. 80-1(2):13-62)].
Cotesia eliniae Papp 1989		CNC703740	Greenland		South-West of Greenland, Godhavn	69.0025	-55.5667	20 Jul. 1992	J. Böcher		ZMUC	Specimen not in CNC collection, information extracted from van Achterberg (2006) [The Braconidae (Hymenoptera) of Greenland. Zoologische Mededelingen Leiden. 80-1(2):13-62)].
Cotesia eliniae Papp 1989		CNC703741	Greenland		Mestersvig			6 Jun. 1953	C. Vibe		ZMUC	Specimen not in CNC collection, information extracted from van Achterberg (2006) [The Braconidae (Hymenoptera) of Greenland. Zoologische Mededelingen Leiden. 80-1(2):13-62)].
Cotesia eliniae Papp 1989		CNC703742	Greenland		Thule			25 Jul. 1951	Chr. Vibe		ZMUC	Specimen not in CNC collection, information extracted from van Achterberg (2006) [The Braconidae (Hymenoptera) of Greenland. Zoologische Mededelingen Leiden. 80-1(2):13-62)].
Cotesia eliniae Papp 1989		CNC703743	Greenland		Marrait (Nugssuaq)			17 Jul. 1949	Chr. Vibe		RMNH	Specimen not in CNC collection, information extracted from van Achterberg (2006) [The Braconidae (Hymenoptera) of Greenland. Zoologische Mededelingen Leiden. 80-1(2):13-62)].
Cotesia eliniae Papp 1989		CNC703744	Greenland		Marrait (Nugssuaq)			17 Jul. 1949	Chr. Vibe		ZMUC	Specimen not in CNC collection, information extracted from van Achterberg (2006) [The Braconidae (Hymenoptera) of Greenland. Zoologische Mededelingen Leiden. 80-1(2):13-62)].
Cotesia eliniae Papp 1989		CNC703745	Greenland		Marrait (Nugssuaq)			17 Jul. 1949	Chr. Vibe		ZMUC	Specimen not in CNC collection, information extracted from van Achterberg (2006) [The Braconidae (Hymenoptera) of Greenland. Zoologische Mededelingen Leiden. 80-1(2):13-62)].
Cotesia eliniae Papp 1989		MIC000330	Canada	Northwest Territories	Banks Island, Masik River	71.5333	-123.8	29 Jul. 1968	W. Mason		CNC
Cotesia eliniae Papp 1989		MIC000331	Canada	Nunavut	Axel Heiberg Island; Axel Heiberg Island	79.25	-90.45	19 Jul. 1963	H. K. Rutz		CNC
Cotesia fascifemorata van Achterberg 2006		CNC703746	Greenland		South-West of Greenland, Bjornesund, Eqaluit	62.9	-50.15	28-29 Jun. 2003			ZMUC	Specimen not in CNC collection, information extracted from van Achterberg (2006) [The Braconidae (Hymenoptera) of Greenland. Zoologische Mededelingen Leiden. 80-1(2):13-62)]. Kissavik Exp.
Cotesia hallii (Packard 1877)	Cotesia halli	MIC000326	Greenland		Nedre Midsommer So; Greenland	82.15	-34.15	1 Jul. 1966	Canadian Peary Land Expedition		CNC
Cotesia hallii (Packard 1877)	Cotesia jft08	CAM0578	Canada	Nunavut	Bylot Island	73.1572	-79.9495		L. Jolicoeur		CNC
Cotesia hallii (Packard 1877)	Cotesia jft08	GOU0517	Canada	Northwest Territories	Banks Island, Sachs Harbour	71.9865	-125.243	22 Jul. 2010	Goulet & Boudreault		CNC
Cotesia hallii (Packard 1877)	Cotesia jft08	GOU0525	Canada	Northwest Territories	Banks Island, Sachs Harbour	71.9865	-125.243	22 Jul. 2010	Goulet & Boudreault		CNC
Cotesia hallii (Packard 1877)	Cotesia jft08	MIC000317	Canada	Nunavut	Ellesmere Island, Eureka	79.59	-85.79	6 Jul. 1953	P. F. Bruggemann		CNC
Cotesia hallii (Packard 1877)	Cotesia jft08	MIC000319	Canada	Nunavut	Alexandra Fiord; Ellesmere Island	78.53	-75.55	15 Jul. 1982	O. Kukal		CNC
Cotesia hallii (Packard 1877)	Cotesia jft08	MIC000320	Canada	Nunavut	Ellesmere Island, Eureka	79.59	-85.79	6 Jul. 1953	P. F. Bruggemann		CNC
Cotesia hallii (Packard 1877)	Cotesia jft08	MIC000321	Canada	Nunavut	Alexandra Fiord; Ellesmere Island	78.53	-75.55	6 Jul. 1982	O. Kukal		CNC
Cotesia hallii (Packard 1877)	Cotesia jft08	MIC000327	Canada	Nunavut	Ellesmere Island, Hazen Camp	81.8167	-71.3	12 Jul. 1963	D. R. Oliver		CNC
Cotesia hallii (Packard 1877)	Cotesia jft08	MIC000328	Canada	Nunavut	Ellesmere Island, Hazen Camp	81.8167	-71.3	15 Jul. 1963	R. Leech		CNC
Cotesia hallii (Packard 1877)	Cotesia jft08	MIC000329	Canada	Nunavut	Devon Island	75	-85	7 Jul. 1970			CNC
Cotesia hallii (Packard 1877)	Cotesia jft09	MIC000322	Canada	Nunavut	Ellesmere Island	79.4833	-75.8333	11 Jul. 1980	J. Smith		CNC
Cotesia hallii (Packard 1877)	Cotesia jft09	MIC000325	Canada	Nunavut	Baffin Island, Iqaluit	63.45	-68.31	31 Jul. 1948	F. DiLabio		CNC
Cotesia hallii (Packard 1877)	Cotesia jft14	CAM0571	Canada	Nunavut	Bylot Island	73.1572	-79.9495		L. Jolicoeur		CNC
Cotesia hallii (Packard 1877)	Cotesia jft14	CAM0572	Canada	Nunavut	Bylot Island	73.1572	-79.9495		L. Jolicoeur		CNC
Cotesia hallii (Packard 1877)	Cotesia jft14	CAM0577	Canada	Nunavut	Bylot Island	73.1572	-79.9495		L. Jolicoeur		CNC
Cotesia hallii (Packard 1877)	Cotesia jft21	CAM0579	Canada	Nunavut	Bylot Island	73.1572	-79.9495		L. Jolicoeur		CNC
Cotesia hallii (Packard 1877)	Cotesia jft22	MIC000318	Canada	Northwest Territories	Banks Island, Masik River	71.5333	-123.8	28 Jul. 1968	W. Mason		CNC
Cotesia hallii (Packard 1877)	Cotesia jft48	CAM0573	Canada	Nunavut	Bylot Island	73.1572	-79.9495		L. Jolicoeur		CNC
Cotesia hallii (Packard 1877)	Cotesia sp.	24412-F04	Greenland		Zackenberg	74.4667	-20.5667		M. Tiusanen & T. Roslin		MZH
Cotesia hallii (Packard 1877)	Cotesia sp.	ZA2011-130	Greenland		Zackenberg Research Station	74.4667	-20.5667		T. Roslin & G. Varkonyi		MZH
Cotesia hallii (Packard 1877)	Cotesia sp.	ZA2011-176	Greenland		Zackenberg Research Station	74.4667	-20.5667		T. Roslin & G. Varkonyi		MZH
Cotesia hallii (Packard 1877)	Cotesia sp.	ZMUC00023384	Greenland		Zackenberg: Station 4 D	74.4667	-20.5667	22 Jul. 2002			MZH
Cotesia hallii (Packard 1877)		CAM0575	Canada	Nunavut	Bylot Island	73.1572	-79.9495		L. Jolicoeur		CNC
Cotesia hallii (Packard 1877)		CAM0576	Canada	Nunavut	Bylot Island	73.1572	-79.9495		L. Jolicoeur		CNC
Cotesia hallii (Packard 1877)		CAM0640	Canada	Nunavut	Ellesmere Island, Fosheim Peninsula, Hot Weather Creek	79.9667	-84.4667	31 Jul. 1990	F. Brodo		CNC
Cotesia hallii (Packard 1877)		CAM0658	Canada	Nunavut	Ellesmere Island, Fosheim Peninsula, Hot Weather Creek	79.9667	-84.4667	2 Aug. 1990	F. Brodo		CNC
Cotesia hallii (Packard 1877)		CAM0659	Canada	Nunavut	Ellesmere Island, Fosheim Peninsula, Hot Weather Creek	79.9667	-84.4667	17 Jul. 1990	F. Brodo		CNC
Cotesia hallii (Packard 1877)		CAM0660	Canada	Nunavut	Ellesmere Island, Fosheim Peninsula, Hot Weather Creek	79.967	-84.467	17 Jul. 1990	F. Brodo		CNC
Cotesia hallii (Packard 1877)		CAM0661	Canada	Nunavut	Ellesmere Island, Fosheim Peninsula, Hot Weather Creek	79.9667	-84.4667	17 Jul. 1990	F. Brodo		CNC
Cotesia hallii (Packard 1877)		CAM0662	Canada	Nunavut	Ellesmere Island, Fosheim Peninsula, Hot Weather Creek	79.9667	-84.4667	2 Aug. 1990	F. Brodo		CNC
Cotesia hallii (Packard 1877)		CAM0663	Canada	Nunavut	Ellesmere Island, Fosheim Peninsula, Hot Weather Creek	79.9667	-84.4667	17 Jul. 1990	F. Brodo		CNC
Cotesia hallii (Packard 1877)		CAM0664	Canada	Nunavut	Ellesmere Island, Fosheim Peninsula, Hot Weather Creek	79.9667	-84.4667	24 Jul. 1990	F. Brodo		CNC
Cotesia hallii (Packard 1877)		CAM0666	Canada	Nunavut	Ellesmere Island, Fosheim Peninsula, Hot Weather Creek	79.9667	-84.4667	5 Aug. 1990	F. Brodo		CNC
Cotesia hallii (Packard 1877)		CAM0671	Canada	Nunavut	Ellesmere Island, Fosheim Peninsula, Hot Weather Creek	79.9667	-84.4667	8 Jul. 1991	F. Brodo		CNC
Cotesia hallii (Packard 1877)		CAM0672	Canada	Nunavut	Ellesmere Island, Fosheim Peninsula, Hot Weather Creek	79.9667	-84.4667	8 Jul. 1991	F. Brodo		CNC
Cotesia hallii (Packard 1877)		CNC280806	Canada	Nunavut	Ellesmere Island, Alexandra Fiord	78.53	-75.55	2 Jul. 1981	Kukal, O.	pan trap	CNC	I.D. by W.R.M. Mason.
Cotesia hallii (Packard 1877)		CNC492313	Canada	Nunavut	Ellesmere Island, Hazen Camp	81.8167	-71.3	14 Jul. 1963	H.K.Rutz		CNC
Cotesia hallii (Packard 1877)		CNC492318	Canada	Nunavut	Ellesmere Island, Hazen Camp	81.8167	-71.3	22 Jul. 1962	R. B. Madge		CNC
Cotesia hallii (Packard 1877)		CNC492319	Canada	Nunavut	Ellesmere Island, Hazen Camp	81.8167	-71.3				CNC
Cotesia hallii (Packard 1877)		CNC492320	Canada	Nunavut	Ellesmere Island, Hazen Camp	81.8167	-71.3				CNC
Cotesia hallii (Packard 1877)		CNC492321	Canada	Nunavut	Ellesmere Island, Hazen Camp	81.8167	-71.3				CNC
Cotesia hallii (Packard 1877)		CNC492322	Canada	Nunavut	Ellesmere Island, Hazen Camp	81.8167	-71.3				CNC
Cotesia hallii (Packard 1877)		CNC492323	Canada	Nunavut	Ellesmere Island, Hazen Camp	81.8167	-71.3				CNC
Cotesia hallii (Packard 1877)		CNC492324	Canada	Nunavut	Ellesmere Island, Hazen Camp	81.8167	-71.3				CNC
Cotesia hallii (Packard 1877)		CNC492325	Canada	Nunavut	Ellesmere Island, Hazen Camp	81.8167	-71.3				CNC
Cotesia hallii (Packard 1877)		CNC492326	Canada	Nunavut	Ellesmere Island, Hazen Camp	81.8167	-71.3				CNC
Cotesia hallii (Packard 1877)		CNC492327	Canada	Nunavut	Ellesmere Island, Hazen Camp	81.8167	-71.3				CNC
Cotesia hallii (Packard 1877)		CNC492328	Canada	Nunavut	Ellesmere Island, Hazen Camp	81.8167	-71.3				CNC
Cotesia hallii (Packard 1877)		CNC492329	Canada	Nunavut	Ellesmere Island, Hazen Camp	81.8167	-71.3				CNC
Cotesia hallii (Packard 1877)		CNC492330	Canada	Nunavut	Ellesmere Island, Hazen Camp	81.8167	-71.3				CNC
Cotesia hallii (Packard 1877)		CNC492331	Canada	Nunavut	Ellesmere Island, Hazen Camp	81.8167	-71.3				CNC
Cotesia hallii (Packard 1877)		CNC492332	Canada	Nunavut	Ellesmere Island, Hazen Camp	81.8167	-71.3				CNC
Cotesia hallii (Packard 1877)		CNC492333	Canada	Nunavut	Ellesmere Island, Hazen Camp	81.8167	-71.3				CNC
Cotesia hallii (Packard 1877)		CNC492334	Canada	Nunavut	Ellesmere Island, Hazen Camp	81.8167	-71.3				CNC
Cotesia hallii (Packard 1877)		CNC492335	Canada	Nunavut	Ellesmere Island, Hazen Camp	81.8167	-71.3				CNC
Cotesia hallii (Packard 1877)		CNC492336	Canada	Nunavut	Ellesmere Island, Hazen Camp	81.8167	-71.3				CNC
Cotesia hallii (Packard 1877)		CNC492337	Canada	Nunavut	Ellesmere Island, Hazen Camp	81.8167	-71.3				CNC
Cotesia hallii (Packard 1877)		CNC492338	Canada	Nunavut	Ellesmere Island, Hazen Camp	81.8167	-71.3				CNC
Cotesia hallii (Packard 1877)		CNC492339	Canada	Nunavut	Ellesmere Island, Hazen Camp	81.8167	-71.3				CNC
Cotesia hallii (Packard 1877)		CNC492340	Canada	Nunavut	Ellesmere Island, Hazen Camp	81.8167	-71.3				CNC
Cotesia hallii (Packard 1877)		CNC492341	Canada	Nunavut	Ellesmere Island, Hazen Camp	81.8167	-71.3				CNC
Cotesia hallii (Packard 1877)		CNC492342	Canada	Nunavut	Ellesmere Island, Hazen Camp	81.8167	-71.3				CNC
Cotesia hallii (Packard 1877)		CNC492343	Canada	Nunavut	Ellesmere Island, Hazen Camp	81.8167	-71.3				CNC
Cotesia hallii (Packard 1877)		CNC492344	Canada	Nunavut	Ellesmere Island, Alexandra Fiord	78.53	-75.55				CNC
Cotesia hallii (Packard 1877)		CNC492345	Canada	Nunavut	Ellesmere Island, Alexandra Fiord	78.53	-75.55				CNC
Cotesia hallii (Packard 1877)		CNC492346	Canada	Nunavut	Ellesmere Island, Alexandra Fiord	78.53	-75.55				CNC
Cotesia hallii (Packard 1877)		CNC492347	Canada	Nunavut	Ellesmere Island, Alexandra Fiord	78.53	-75.55	11-20 Jul. 1982	Olga Kukal	pan trap	CNC	”Alexandra Fiord” can also be spelled ”Alexandra Fjord”
Cotesia hallii (Packard 1877)		CNC492348	Canada	Nunavut	Ellesmere Island, Alexandra Fiord	78.53	-75.55	11-20 Jul. 1982	Olga Kukal	pan trap	CNC	”Alexandra Fiord” can also be spelled ”Alexandra Fjord”
Cotesia hallii (Packard 1877)		CNC492349	Canada	Nunavut	Ellesmere Island, Eureka	79.59	-85.79	5-6 Jul. 1953	P. F. Bruggemann	reared	CNC	Territory is given as North West Territories (N.W.T.) , but Ellesmere Island is now part of Nunavut.
Cotesia hallii (Packard 1877)		CNC492350	Canada	Nunavut	Ellesmere Island, Eureka	79.59	-85.79	5-6 Jul. 1953	P. F. Bruggemann	reared	CNC	Territory is given as North West Territories (N.W.T.) , but Ellesmere Island is now part of Nunavut.
Cotesia hallii (Packard 1877)		CNC492351	Canada	Nunavut	Ellesmere Island, Eureka	79.59	-85.79	5-6 Jul. 1953	P. F. Bruggemann	reared	CNC	Territory is given as North West Territories (N.W.T.) , but Ellesmere Island is now part of Nunavut.
Cotesia hallii (Packard 1877)		CNC492352	Canada	Nunavut	Ellesmere Island, Eureka	79.59	-85.79	5-6 Jul. 1953	P. F. Bruggemann	reared	CNC	Territory is given as North West Territories (N.W.T.) , but Ellesmere Island is now part of Nunavut.
Cotesia hallii (Packard 1877)		CNC492353	Canada	Nunavut	Ellesmere Island, Eureka	79.59	-85.79	5-6 Jul. 1953	P. F. Bruggemann	reared	CNC	Territory is given as North West Territories (N.W.T.) , but Ellesmere Island is now part of Nunavut.
Cotesia hallii (Packard 1877)		CNC492354	Canada	Nunavut	Ellesmere Island, Eureka	79.59	-85.79	5-6 Jul. 1953	P. F. Bruggemann	reared	CNC	Territory is given as North West Territories (N.W.T.) , but Ellesmere Island is now part of Nunavut.
Cotesia hallii (Packard 1877)		CNC492355	Canada	Nunavut	Ellesmere Island, Alexandra Fiord	78.53	-75.55	20 Jul.-3 Aug. 1982	Olga Kukal	pan trap	CNC	”Alexandra Fiord” can also be spelled ”Alexandra Fjord”
Cotesia hallii (Packard 1877)		CNC492356	Canada	Nunavut	Ellesmere Island, Alexandra Fiord	78.53	-75.55	20 Jul.-3 Aug. 1982	Olga Kukal	pan trap	CNC	”Alexandra Fiord” can also be spelled ”Alexandra Fjord”
Cotesia hallii (Packard 1877)		CNC492357	Canada	Nunavut	Ellesmere Island, Eureka	79.59	-85.79	5-6 Jul. 1953	P. F. Bruggemann	reared	CNC	Territory is given as North West Territories (N.W.T.) , but Ellesmere Island is now part of Nunavut.
Cotesia hallii (Packard 1877)		CNC492358	Canada	Nunavut	Ellesmere Island, Eureka	79.59	-85.79	5-6 Jul. 1953	P. F. Bruggemann	reared	CNC	Territory is given as North West Territories (N.W.T.) , but Ellesmere Island is now part of Nunavut.
Cotesia hallii (Packard 1877)		CNC492359	Canada	Nunavut	Ellesmere Island, Eureka	79.59	-85.79	5-6 Jul. 1953	P. F. Bruggemann	reared	CNC	Territory is given as North West Territories (N.W.T.), but Ellesmere Island is now part of Nunavut.
Cotesia hallii (Packard 1877)		CNC492360	Canada	Nunavut	Ellesmere Island, Eureka	79.59	-85.79	5-6 Jul. 1953	P. F. Bruggemann	reared	CNC	Territory is given as North West Territories (N.W.T.), but Ellesmere Island is now part of Nunavut.
Cotesia hallii (Packard 1877)		CNC492361	Canada	Northwest Territories	Victoria Island	71.2833	-114	23-28 Jul. 1975	G. & M. Wood		CNC	Chironomids swept. Reared from a chironomid collected via sweeping?
Cotesia hallii (Packard 1877)		CNC492362	Canada	Nunavut	Ellesmere Island, Eureka	79.59	-85.79	5-6 Jul. 1953	P. F. Bruggemann	reared	CNC	Territory is given as North West Territories (N.W.T.) , but Ellesmere Island is now part of Nunavut.
Cotesia hallii (Packard 1877)		CNC492363	Greenland		Sondrestrom Air Base			19 Jun. 1952	W. J. Brown		CNC
Cotesia hallii (Packard 1877)		CNC492364	Canada	Nunavut	Baffin Island, Iqaluit	63.45	-68.31	3 Aug. 1948	F. G. DiLabio		CNC
Cotesia hallii (Packard 1877)		CNC492365	Canada	Nunavut	Ellesmere Island, Hazen Camp R.	81.8167	-71.3	11 Jul. 1962	R. B. Madge		CNC
Cotesia hallii (Packard 1877)		CNC492366	Canada	Nunavut	Ellesmere Island, Hazen Camp R.	81.8167	-71.3	10 Jul. 1962	R. B. Madge		CNC
Cotesia hallii (Packard 1877)		CNC492367	Canada	Nunavut	Ellesmere Island, Hazen Camp R.	81.8167	-71.3	10 Jul. 1962	R. B. Madge		CNC
Cotesia hallii (Packard 1877)		CNC492368	Canada	Nunavut	Ellesmere Island, Hazen Camp R.	81.8167	-71.3	10 Jul. 1962	R. B. Madge		CNC
Cotesia hallii (Packard 1877)		CNC492369	Canada	Nunavut	Ellesmere Island, Hazen Camp, NE	81.8167	-71.2667	11 Jul. 1962	D. R. Oliver		CNC
Cotesia hallii (Packard 1877)		CNC492370	Canada	Nunavut	Ellesmere Island, Hazen Camp, NE	81.8167	-71.2667	1962	D. R. Oliver		CNC
Cotesia hallii (Packard 1877)		CNC492371	Canada	Nunavut	Ellesmere Island, Hazen Camp, NE	81.8167	-71.2667	5 Jul. 1962	D. R. Oliver		CNC
Cotesia hallii (Packard 1877)		CNC492372	Canada	Nunavut	Ellesmere Island, Hazen Camp, NE	81.8167	-71.2667	11 Jul. 1963	D. R. Oliver		CNC
Cotesia hallii (Packard 1877)		CNC492373	Canada	Nunavut	Ellesmere Island, Hazen Camp	81.8167	-71.3	19 Jul. 1963	R. E. Leech		CNC
Cotesia hallii (Packard 1877)		CNC492374	Canada	Nunavut	Ellesmere Island	79.4833	-75.8333	14 Jul. 1980	J. R. Smith		CNC
Cotesia hallii (Packard 1877)		CNC492375	Canada	Nunavut	Ellesmere Island	79.4833	-75.8333	14 Jul. 1980	J. R. Smith		CNC
Cotesia hallii (Packard 1877)		CNC492376	Canada	Nunavut	Ellesmere Island	79.4833	-75.8333	14 Jul. 1980	J. R. Smith		CNC
Cotesia hallii (Packard 1877)		CNC492377	Canada	Nunavut	Ellesmere Island	79.4833	-75.8333	14 Jul. 1980	J. R. Smith		CNC
Cotesia hallii (Packard 1877)		CNC492378	Canada	Nunavut	Ellesmere Island	79.4833	-75.8333	14 Jul. 1980	J. R. Smith		CNC
Cotesia hallii (Packard 1877)		CNC492379	Canada	Nunavut	Ellesmere Island	79.4833	-75.8333	14 Jul. 1980	J. R. Smith		CNC
Cotesia hallii (Packard 1877)		CNC492380	Canada	Nunavut	Ellesmere Island	79.4833	-75.8333	14 Jul. 1980	J. R. Smith		CNC
Cotesia hallii (Packard 1877)		CNC492381	Canada	Nunavut	Devon Island	75	-85	7 Jul. 1970	J. K. Ryan		CNC	Devon Island I.B.P. Project
Cotesia hallii (Packard 1877)		CNC492382	Canada	Nunavut	Devon Island	75	-85	6 Jul. 1970	J. K. Ryan		CNC	Devon Island I.B.P. Project
Cotesia hallii (Packard 1877)		CNC492383	Canada	Nunavut	Devon Island	75	-85	6 Jul. 1970	J. K. Ryan		CNC	Devon Island I.B.P. Project
Cotesia hallii (Packard 1877)		CNC492384	Canada	Nunavut	Devon Island	75	-85	7 Jul. 1970	J. K. Ryan		CNC	Devon Island I.B.P. Project
Cotesia hallii (Packard 1877)		CNC492385	Canada	Nunavut	Devon Island	75	-85	7 Jul. 1970	J. K. Ryan		CNC	Devon Island I.B.P. Project
Cotesia hallii (Packard 1877)		CNC492386	Canada	Nunavut	Devon Island	75	-85	7 Jul. 1970	J. K. Ryan		CNC	Devon Island I.B.P. Project
Cotesia hallii (Packard 1877)		CNC492387	Canada	Nunavut	Devon Island	75	-85	7 Jul. 1970	J. K. Ryan		CNC	Devon Island I.B.P. Project
Cotesia hallii (Packard 1877)		CNC492388	Canada	Nunavut	Devon Island	75	-85	7 Jul. 1970	J. K. Ryan		CNC	Devon Island I.B.P. Project
Cotesia hallii (Packard 1877)		CNC492389	Canada	Nunavut	Devon Island	75	-85	7 Jul. 1970	J. K. Ryan		CNC	Devon Island I.B.P. Project
Cotesia hallii (Packard 1877)		CNC492390	Canada	Nunavut	Devon Island	75	-85	7 Jul. 1970	J. K. Ryan		CNC	Devon Island I.B.P. Project
Cotesia hallii (Packard 1877)		CNC492391	Canada	Nunavut	Devon Island	75	-85	6 Jul. 1970	J. K. Ryan		CNC	Devon Island I.B.P. Project
Cotesia hallii (Packard 1877)		CNC492392	Canada	Nunavut	Devon Island	75	-85	6 Jul. 1970	J. K. Ryan		CNC	Devon Island I.B.P. Project
Cotesia hallii (Packard 1877)		CNC492393	Canada	Nunavut	Devon Island	75	-85	6 Jul. 1970	J. K. Ryan		CNC	Devon Island I.B.P. Project
Cotesia hallii (Packard 1877)		CNC492394	Canada	Nunavut	Devon Island	75	-85	6 Jul. 1970	J. K. Ryan		CNC	Devon Island I.B.P. Project
Cotesia hallii (Packard 1877)		CNC492395	Canada	Nunavut	Devon Island	75	-85	6 Jul. 1970	J. K. Ryan		CNC	Devon Island I.B.P. Project
Cotesia hallii (Packard 1877)		CNC492396	Canada	Nunavut	Devon Island	75	-85	6 Jul. 1970	J. K. Ryan		CNC	Devon Island I.B.P. Project
Cotesia hallii (Packard 1877)		CNC492397	Canada	Nunavut	Devon Island	75	-85	6 Jul. 1970	J. K. Ryan		CNC	Devon Island I.B.P. Project
Cotesia hallii (Packard 1877)		CNC492398	Canada	Nunavut	Devon Island	75	-85	6 Jul. 1970	J. K. Ryan		CNC	Devon Island I.B.P. Project
Cotesia hallii (Packard 1877)		CNC492399	Canada	Nunavut	Devon Island	75	-85	7 Jul. 1970	J. K. Ryan		CNC	Devon Island I.B.P. Project
Cotesia hallii (Packard 1877)		CNC492400	Canada	Nunavut	Devon Island	75	-85	Aug. 1971	J. Ryan & C. Hergert	pitfall trap	CNC	I.B.P. Project
Cotesia hallii (Packard 1877)		CNC492401	Canada	Nunavut	Devon Island	75	-85	Aug. 1971	J. Ryan & C. Hergert	pitfall trap	CNC	I.B.P. Project
Cotesia hallii (Packard 1877)		CNC492402	Canada	Nunavut	Ellesmere Island, Hazen Camp	81.8167	-71.3	11 Jul. 1963	H. K. Rutz		CNC	Typo in the latitude on the label (89°49'N is the North Pole, not Hazen Camp). Hazen camp is at 81°49'N.
Cotesia hallii (Packard 1877)		CNC492403	Canada	Nunavut	Ellesmere Island, Hazen Camp	81.8167	-71.3	11 Jul. 1963	H. K. Rutz		CNC	Typo in the latitude on the label (89°49'N is the North Pole, not Hazen Camp). Hazen camp is at 81°49'N.
Cotesia hallii (Packard 1877)		CNC492404	Canada	Nunavut	Ellesmere Island, Hazen Camp	81.8167	-71.3	11 Jul. 1963	R. E. Leech		CNC
Cotesia hallii (Packard 1877)		CNC492405	Canada	Nunavut	Ellesmere Island, Hazen Camp	81.8167	-71.3	11 Jul. 1963	R. E. Leech		CNC
Cotesia hallii (Packard 1877)		CNC492406	Canada	Nunavut	Ellesmere Island, Hazen Camp	81.8167	-71.3	11 Jul. 1963	R. E. Leech		CNC
Cotesia hallii (Packard 1877)		CNC492911	Canada	Nunavut	Ellesmere Island, Hazen Camp	81.8167	-71.3	6 Aug. 1963	H. K. Rutz		CNC
Cotesia hallii (Packard 1877)		CNC492912	Canada	Nunavut	Ellesmere Island, Hazen Camp	81.8167	-71.3	15 Jul. 1963	R. E. Leech		CNC
Cotesia hallii (Packard 1877)		CNC492913	Canada	Nunavut	Ellesmere Island, Hazen Camp	81.8167	-71.3	11 Jul. 1963	R. E. Leech		CNC
Cotesia hallii (Packard 1877)		CNC492914	Canada	Nunavut	Ellesmere Island, Hazen Camp	81.8167	-71.3	11 Jul. 1963	R. E. Leech		CNC
Cotesia hallii (Packard 1877)		CNC492915	Canada	Nunavut	Ellesmere Island, Hazen Camp	81.8167	-71.3	11 Jul. 1963	R. E. Leech		CNC
Cotesia hallii (Packard 1877)		CNC492916	Canada	Nunavut	Ellesmere Island, Hazen Camp	81.8167	-71.3	11 Jul. 1963	R. E. Leech		CNC
Cotesia hallii (Packard 1877)		CNC492917	Canada	Nunavut	Ellesmere Island, Hazen Camp	81.8167	-71.3	19 Aug. 1963	R. E. Leech		CNC
Cotesia hallii (Packard 1877)		CNC492918	Canada	Nunavut	Ellesmere Island, Hazen Camp	81.8167	-71.3	15 Jul. 1963	R. E. Leech		CNC
Cotesia hallii (Packard 1877)		CNC492919	Canada	Nunavut	Ellesmere Island, Hazen Camp	81.8167	-71.3	23 Jul. 1963	R. E. Leech		CNC
Cotesia hallii (Packard 1877)		CNC492920	Canada	Nunavut	Ellesmere Island, Hazen Camp	81.8167	-71.3	23 Jul. 1963	R. E. Leech		CNC
Cotesia hallii (Packard 1877)		CNC492921	Canada	Nunavut	Ellesmere Island, Hazen Camp	81.8167	-71.3	31 Jul. 1963	R. E. Leech		CNC
Cotesia hallii (Packard 1877)		CNC492922	Canada	Nunavut	Ellesmere Island, Hazen Camp	81.8167	-71.3	15 Jul. 1963	R. E. Leech		CNC
Cotesia hallii (Packard 1877)		CNC492923	Canada	Nunavut	Ellesmere Island, Hazen Camp	81.8167	-71.3	15 Jul. 1963	R. E. Leech		CNC
Cotesia hallii (Packard 1877)		CNC492924	Canada	Nunavut	Ellesmere Island, Hazen Camp	81.8167	-71.3	15 Jul. 1963	R. E. Leech		CNC
Cotesia hallii (Packard 1877)		CNC492925	Canada	Nunavut	Ellesmere Island, Hazen Camp	81.8167	-71.3	15 Jul. 1963	R. E. Leech		CNC
Cotesia hallii (Packard 1877)		CNC492926	Canada	Nunavut	Ellesmere Island, Hazen Camp	81.8167	-71.3	11 Jul. 1963	R. E. Leech		CNC
Cotesia hallii (Packard 1877)		CNC492927	Canada	Nunavut	Ellesmere Island, Hazen Camp	81.8167	-71.3	11 Jul. 1963	R. E. Leech		CNC
Cotesia hallii (Packard 1877)		CNC492928	Canada	Nunavut	Ellesmere Island, Hazen Camp	81.8167	-71.3	21 Aug. 1963	R. E. Leech		CNC
Cotesia hallii (Packard 1877)		CNC492929	Canada	Nunavut	Ellesmere Island, Hazen Camp	81.8167	-71.3	15 Jul. 1963	R. E. Leech		CNC
Cotesia hallii (Packard 1877)		CNC492930	Canada	Nunavut	Ellesmere Island, Hazen Camp	81.8167	-71.3	15 Jul. 1963	R. E. Leech		CNC
Cotesia hallii (Packard 1877)		CNC492931	Canada	Nunavut	Ellesmere Island, Hazen Camp	81.8167	-71.3	15 Jul. 1963	R. E. Leech		CNC
Cotesia hallii (Packard 1877)		CNC492932	Canada	Nunavut	Ellesmere Island, Hazen Camp	81.8167	-71.3	15 Jul. 1963	R. E. Leech		CNC
Cotesia hallii (Packard 1877)		CNC492933	Canada	Nunavut	Ellesmere Island, Hazen Camp	81.8167	-71.3	15 Jul. 1963	R. E. Leech		CNC
Cotesia hallii (Packard 1877)		CNC492934	Canada	Northwest Territories	Banks Island, Masik River	71.5333	-123.8	29 Jul. 1968	W. R. M. Mason	pan trap	CNC
Cotesia hallii (Packard 1877)		CNC492935	Canada	Nunavut	Ellesmere Island, Hazen Camp	81.8167	-71.3	16 Jul. 1963	R. E. Leech		CNC
Cotesia hallii (Packard 1877)		CNC492936	Canada	Nunavut	Ellesmere Island	79.4833	-75.8333	14 Jul. 1980	J. R. Smith		CNC
Cotesia hallii (Packard 1877)		CNC492937	Canada	Nunavut	Ellesmere Island	79.4833	-75.8333	14 Jul. 1980	J. R. Smith		CNC
Cotesia hallii (Packard 1877)		CNC492938	Canada	Nunavut	Ellesmere Island	79.4833	-75.8333	14 Jul. 1980	J. R. Smith		CNC
Cotesia hallii (Packard 1877)		CNC492939	Canada	Nunavut	Ellesmere Island	79.4833	-75.8333	14 Jul. 1980	J. R. Smith		CNC
Cotesia hallii (Packard 1877)		CNC492940	Canada	Nunavut	Ellesmere Island	79.4833	-75.8333	14 Jul. 1980	J. R. Smith		CNC
Cotesia hallii (Packard 1877)		CNC492941	Canada	Nunavut	Ellesmere Island	79.4833	-75.8333	14 Jul. 1980	J. R. Smith		CNC
Cotesia hallii (Packard 1877)		CNC492942	Canada	Nunavut	Ellesmere Island	79.4833	-75.8333	14 Jul. 1980	J. R. Smith		CNC
Cotesia hallii (Packard 1877)		CNC492943	Canada	Nunavut	Ellesmere Island	79.4833	-75.8333	14 Jul. 1980	J. R. Smith		CNC
Cotesia hallii (Packard 1877)		CNC492944	Canada	Nunavut	Ellesmere Island	79.4833	-75.8333	14 Jul. 1980	J. R. Smith		CNC
Cotesia hallii (Packard 1877)		CNC492945	Canada	Nunavut	Baffin Island, Iqaluit	63.45	-68.31	31 Jul. 1948	F. G. DiLabio		CNC
Cotesia hallii (Packard 1877)		CNC492946	Canada	Nunavut	Devon Island	75	-85	7 Jul. 1970			CNC
Cotesia hallii (Packard 1877)		CNC492947	Canada	Nunavut	Devon Island	75	-85	7 Jul. 1970			CNC
Cotesia hallii (Packard 1877)		CNC492948	Canada	Nunavut	Devon Island	75	-85	7 Jul. 1970			CNC
Cotesia hallii (Packard 1877)		CNC492949	Canada	Nunavut	Devon Island	75	-85	7 Jul. 1970			CNC
Cotesia hallii (Packard 1877)		CNC492950	Canada	Nunavut	Devon Island	75	-85	7 Jul. 1970			CNC
Cotesia hallii (Packard 1877)		CNC492951	Canada	Nunavut	Devon Island	75	-85	7 Jul. 1970			CNC
Cotesia hallii (Packard 1877)		CNC492952	Canada	Nunavut	Devon Island	75	-85	7 Jul. 1970			CNC
Cotesia hallii (Packard 1877)		CNC492953	Canada	Nunavut	Devon Island	75	-85	7 Jul. 1970			CNC
Cotesia hallii (Packard 1877)		CNC492954	Canada	Nunavut	Devon Island	75	-85	7 Jul. 1970			CNC
Cotesia hallii (Packard 1877)		CNC492955	Canada	Nunavut	Devon Island	75	-85	7 Jul. 1970			CNC
Cotesia hallii (Packard 1877)		CNC492956	Canada	Nunavut	Devon Island	75	-85	7 Jul. 1970			CNC
Cotesia hallii (Packard 1877)		CNC492957	Canada	Nunavut	Devon Island	75	-85	7 Jul. 1970			CNC
Cotesia hallii (Packard 1877)		CNC492958	Canada	Nunavut	Devon Island	75	-85	7 Jul. 1970			CNC
Cotesia hallii (Packard 1877)		CNC492959	Canada	Nunavut	Devon Island	75	-85	7 Jul. 1970			CNC
Cotesia hallii (Packard 1877)		CNC492960	Canada	Nunavut	Devon Island	75	-85	7 Jul. 1970			CNC
Cotesia hallii (Packard 1877)		CNC492961	Canada	Nunavut	Devon Island	75	-85	7 Jul. 1970			CNC
Cotesia hallii (Packard 1877)		CNC492962	Canada	Nunavut	Devon Island	75	-85	7 Jul. 1970			CNC
Cotesia hallii (Packard 1877)		CNC492963	Canada	Nunavut	Devon Island	75	-85	7 Jul. 1970			CNC
Cotesia hallii (Packard 1877)		CNC492964	Canada	Nunavut	Devon Island	75	-85	7 Jul. 1970			CNC
Cotesia hallii (Packard 1877)		CNC492965	Canada	Nunavut	Devon Island	75	-85	7 Jul. 1970			CNC
Cotesia hallii (Packard 1877)		CNC492966	Canada	Nunavut	Devon Island	75	-85	7 Jul. 1970			CNC
Cotesia hallii (Packard 1877)		CNC492967	Canada	Nunavut	Devon Island	75	-85	7 Jul. 1970			CNC
Cotesia hallii (Packard 1877)		CNC492968	Canada	Nunavut	Devon Island	75	-85	7 Jul. 1970			CNC
Cotesia hallii (Packard 1877)		CNC492969	Canada	Nunavut	Devon Island	75	-85	7 Jul. 1970			CNC
Cotesia hallii (Packard 1877)		CNC492970	Canada	Northwest Territories	Victoria Island	71.2833	-114	23-28 Jul. 1975	G. & M. Wood	pan trap	CNC
Cotesia hallii (Packard 1877)		CNC492971	Canada	Northwest Territories	Victoria Island	71.2833	-114	11-15 Jul. 1975	G. & M. Wood		CNC
Cotesia hallii (Packard 1877)		CNC492972	Canada	Nunavut	Ellesmere Island	79.4833	-75.8333	14 Jul. 1980	J. R. Smith		CNC
Cotesia hallii (Packard 1877)		CNC492973	Canada	Nunavut	Ellesmere Island	79.4833	-75.8333	14 Jul. 1980	J. R. Smith		CNC
Cotesia hallii (Packard 1877)		CNC492974	Canada	Nunavut	Ellesmere Island	79.4833	-75.8333	14 Jul. 1980	J. R. Smith		CNC
Cotesia hallii (Packard 1877)		CNC492975	Canada	Nunavut	Ellesmere Island	79.4833	-75.8333	14 Jul. 1980	J. R. Smith		CNC
Cotesia hallii (Packard 1877)		CNC492976	Canada	Nunavut	Ellesmere Island, Hazen Camp R.	81.8167	-71.3	5 Jul. 1962	R. B. Madge		CNC
Cotesia hallii (Packard 1877)		CNC492977	Canada	Nunavut	Ellesmere Island, Hazen Camp R.	81.8167	-71.3	5 Jul. 1962	R. B. Madge		CNC
Cotesia hallii (Packard 1877)		CNC492978	Canada	Nunavut	Ellesmere Island, Hazen Camp R.	81.8167	-71.3	10 Jul. 1962	R. B. Madge		CNC
Cotesia hallii (Packard 1877)		CNC492979	Canada	Nunavut	Ellesmere Island, Hazen Camp R.	81.8167	-71.3	11 Jul. 1962	R. B. Madge		CNC
Cotesia hallii (Packard 1877)		CNC492980	Canada	Nunavut	Ellesmere Island, Hazen Camp R.	81.8167	-71.3	10 Jul. 1962	R. B. Madge		CNC
Cotesia hallii (Packard 1877)		CNC492981	Canada	Nunavut	Ellesmere Island, Hazen Camp R.	81.8167	-71.3	10 Jul. 1962	R. B. Madge		CNC
Cotesia hallii (Packard 1877)		CNC492982	Canada	Nunavut	Ellesmere Island, Hazen Camp, NE. 339	81.8167	-71.2667	26 Jun. 1962	D. R. Oliver		CNC
Cotesia hallii (Packard 1877)		CNC492983	Canada	Nunavut	Ellesmere Island, Hazen Camp R.	81.8167	-71.3	11 Jul. 1962	R. B. Madge		CNC
Cotesia hallii (Packard 1877)		CNC492984	Canada	Nunavut	Ellesmere Island, Hazen Camp, NE. 345-11	81.8167	-71.2667	6 Jul. 1962	D. R. Oliver		CNC
Cotesia hallii (Packard 1877)		CNC492985	Canada	Nunavut	Ellesmere Island, Hazen Camp, NE	81.8167	-71.2667	25 Jul. 1963	D. R. Oliver		CNC
Cotesia hallii (Packard 1877)		CNC492986	Canada	Nunavut	Ellesmere Island, Hazen Camp	81.8167	-71.3	14 Jun. 1962	D. R. Oliver		CNC
Cotesia hallii (Packard 1877)		CNC492987	Canada	Nunavut	Ellesmere Island, Hazen Camp	81.8167	-71.3	11 Jul. 1962	R. B. Madge		CNC
Cotesia hallii (Packard 1877)		CNC492988	Canada	Nunavut	Ellesmere Island, Hazen Camp	81.8167	-71.3	11 Jul. 1962	R. B. Madge		CNC
Cotesia hallii (Packard 1877)		CNC492989	Canada	Nunavut	Ellesmere Island, Hazen Camp R.	81.8167	-71.3	5 Jul. 1962	R. B. Madge		CNC
Cotesia hallii (Packard 1877)		CNC492990	Canada	Nunavut	Ellesmere Island, Hazen Camp R.	81.8167	-71.3	5 Jul. 1962	R. B. Madge		CNC
Cotesia hallii (Packard 1877)		CNC492991	Canada	Nunavut	Ellesmere Island, Hazen Camp R.	81.8167	-71.3	11 Jul. 1962	R. B. Madge		CNC
Cotesia hallii (Packard 1877)		CNC492992	Canada	Nunavut	Ellesmere Island, Hazen Camp R.	81.8167	-71.3	5 Jul. 1962	R. B. Madge		CNC
Cotesia hallii (Packard 1877)		CNC492993	Canada	Nunavut	Ellesmere Island, Hazen Camp R.	81.8167	-71.3	5 Jul. 1962	R. B. Madge		CNC
Cotesia hallii (Packard 1877)		CNC492994	Canada	Nunavut	Ellesmere Island, Hazen Camp R.	81.8167	-71.3	5 Jul. 1962	R. B. Madge		CNC
Cotesia hallii (Packard 1877)		CNC492995	Canada	Nunavut	Ellesmere Island, Eureka	79.59	-85.79	5-6 Jul. 1953	P. F. Bruggemann	reared	CNC
Cotesia hallii (Packard 1877)		CNC492996	Canada	Nunavut	Ellesmere Island, Hazen Camp R.	81.8167	-71.3	5 Jul. 1962	R. B. Madge		CNC
Cotesia hallii (Packard 1877)		CNC492997	Canada	Nunavut	Baffin Island, Iqaluit	63.45	-68.31	6 Aug. 1948	F. G. DiLabio		CNC
Cotesia hallii (Packard 1877)		CNC492998	Canada	Nunavut	Baffin Island, Iqaluit	63.45	-68.31	26 Jun. 1948	T. N. Freeman		CNC
Cotesia hallii (Packard 1877)		CNC492999	Canada	Nunavut	Ellesmere Island, Alexandra Fiord	78.53	-75.55	20 Jul.-3 Aug. 1982	Olga Kukal	flight intercept	CNC	Intercepts; ”Alexandra Fiord” can also be spelled ”Alexandra Fjord”
Cotesia hallii (Packard 1877)		CNC493000	Canada	Nunavut	Ellesmere Island, Alexandra Fiord	78.53	-75.55	20 Jul.-3 Aug. 1982	Olga Kukal	pan trap	CNC	”Alexandra Fiord” can also be spelled ”Alexandra Fjord”
Cotesia hallii (Packard 1877)		CNC493001	Canada	Nunavut	Ellesmere Island, Alexandra Fiord	78.53	-75.55	2-10 Jul. 1982	Olga Kukal	pan trap	CNC	”Alexandra Fiord” can also be spelled ”Alexandra Fjord”
Cotesia hallii (Packard 1877)		CNC493002	Canada	Nunavut	Ellesmere Island, Alexandra Fiord	78.53	-75.55	16 Jun.-2 Jul. 1982	Olga Kukal	pan trap	CNC	”Alexandra Fiord” can also be spelled ”Alexandra Fjord”
Cotesia hallii (Packard 1877)		CNC493003	Canada	Nunavut	Ellesmere Island, Alexandra Fiord	78.53	-75.55	11-20 Jul. 1982	Olga Kukal	pan trap	CNC	”Alexandra Fiord” can also be spelled ”Alexandra Fjord”
Cotesia hallii (Packard 1877)		CNC493004	Canada	Nunavut	Ellesmere Island, Alexandra Fiord	78.53	-75.55	2-10 Jul. 1982	Olga Kukal	pan trap	CNC	”Alexandra Fiord” can also be spelled ”Alexandra Fjord”
Cotesia hallii (Packard 1877)		CNC493005	Canada	Nunavut	Ellesmere Island, Alexandra Fiord	78.53	-75.55	11-20 Jul. 1982	Olga Kukal	pan trap	CNC	”Alexandra Fiord” can also be spelled ”Alexandra Fjord”
Cotesia hallii (Packard 1877)		CNC493006	Canada	Nunavut	Ellesmere Island, Alexandra Fiord	78.53	-75.55	2-10 Jul. 1982	Olga Kukal	pan trap	CNC	”Alexandra Fiord” can also be spelled ”Alexandra Fjord”
Cotesia hallii (Packard 1877)		CNC493007	Canada	Nunavut	Ellesmere Island, Alexandra Fiord	78.53	-75.55	11-20 Jul. 1982	Olga Kukal	pan trap	CNC	”Alexandra Fiord” can also be spelled ”Alexandra Fjord”
Cotesia hallii (Packard 1877)		CNC493008	Canada	Nunavut	Ellesmere Island, Alexandra Fiord	78.53	-75.55	2-10 Jul. 1982	Olga Kukal	pan trap	CNC	”Alexandra Fiord” can also be spelled ”Alexandra Fjord”
Cotesia hallii (Packard 1877)		CNC493009	Canada	Nunavut	Ellesmere Island, Alexandra Fiord	78.53	-75.55	11-20 Jul. 1982	Olga Kukal	pan trap	CNC	”Alexandra Fiord” can also be spelled ”Alexandra Fjord”
Cotesia hallii (Packard 1877)		CNC493010	Canada	Nunavut	Ellesmere Island, Alexandra Fiord	78.53	-75.55	2-10 Jul. 1982	Olga Kukal	pan trap	CNC	”Alexandra Fiord” can also be spelled ”Alexandra Fjord”
Cotesia hallii (Packard 1877)		CNC493011	Canada	Nunavut	Ellesmere Island, Alexandra Fiord	78.53	-75.55	2-10 Jul. 1982	Olga Kukal	pan trap	CNC	”Alexandra Fiord” can also be spelled ”Alexandra Fjord”
Cotesia hallii (Packard 1877)		CNC493012	Canada	Nunavut	Ellesmere Island, Alexandra Fiord	78.53	-75.55	2-10 Jul. 1982	Olga Kukal	pan trap	CNC	”Alexandra Fiord” can also be spelled ”Alexandra Fjord”
Cotesia hallii (Packard 1877)		CNC493013	Canada	Nunavut	Ellesmere Island, Alexandra Fiord	78.53	-75.55	20 Jul.-3 Aug. 1982	Olga Kukal	flight intercept	CNC	”Alexandra Fiord” can also be spelled ”Alexandra Fjord”; Intercepts
Cotesia hallii (Packard 1877)		CNC493014	Canada	Nunavut	Ellesmere Island, Alexandra Fiord	78.53	-75.55	20 Jul. 1982	Olga Kukal	flight intercept	CNC	”Alexandra Fiord” can also be spelled ”Alexandra Fjord”; Intercepts
Cotesia hallii (Packard 1877)		CNC493015	Canada	Nunavut	Ellesmere Island, Alexandra Fiord	78.53	-75.55	2-10 Jul. 1982	Olga Kukal	pan trap	CNC	”Alexandra Fiord” can also be spelled ”Alexandra Fjord”
Cotesia hallii (Packard 1877)		CNC493016	Canada	Nunavut	Ellesmere Island, Hazen Camp	81.8167	-71.3	14 Jul. 1962	R. B. Madge		CNC
Cotesia hallii (Packard 1877)		CNC493017	Canada	Nunavut	Ellesmere Island, Hazen Camp	81.8167	-71.3	21 Aug. 1963	R. E. Leech		CNC
Cotesia hallii (Packard 1877)		CNC493018	Canada	Nunavut	Ellesmere Island, Hazen Camp	81.8167	-71.3	14 Jul. 1962	R. B. Madge		CNC
Cotesia hallii (Packard 1877)		CNC493019	Canada	Nunavut	Ellesmere Island, Hazen Camp	81.8167	-71.3	14 Jul. 1962	R. B. Madge		CNC
Cotesia hallii (Packard 1877)		CNC493020	Canada	Nunavut	Ellesmere Island, Hazen Camp	81.8167	-71.3	17 Jul. 1962	R. B. Madge		CNC
Cotesia hallii (Packard 1877)		CNC493021	Canada	Nunavut	Ellesmere Island, Hazen Camp	81.8167	-71.3	15 Jul. 1962	R. B. Madge		CNC
Cotesia hallii (Packard 1877)		CNC493022	Canada	Nunavut	Ellesmere Island, Hazen Camp	81.8167	-71.3	24 Jul. 1962	R. B. Madge		CNC
Cotesia hallii (Packard 1877)		CNC493023	Canada	Nunavut	Ellesmere Island, Hazen Camp	81.8167	-71.3	30 Jul. 1962	R. B. Madge		CNC
Cotesia hallii (Packard 1877)		CNC493024	Canada	Nunavut	Ellesmere Island, Hazen Camp	81.8167	-71.3	16 Jul. 1962	R. B. Madge		CNC
Cotesia hallii (Packard 1877)		CNC493025	Canada	Nunavut	Ellesmere Island, Hazen Camp	81.8167	-71.3	18 Jul. 1962	R. B. Madge		CNC
Cotesia hallii (Packard 1877)		CNC493026	Canada	Nunavut	Ellesmere Island, Hazen Camp	81.8167	-71.3	31 Jul. 1962	R. B. Madge		CNC
Cotesia hallii (Packard 1877)		CNC493027	Canada	Nunavut	Ellesmere Island, Hazen Camp	81.8167	-71.3	20 Jul. 1962	R. B. Madge		CNC
Cotesia hallii (Packard 1877)		CNC493028	Canada	Nunavut	Ellesmere Island, Hazen Camp	81.8167	-71.3	17 Jul. 1962	R. B. Madge		CNC
Cotesia hallii (Packard 1877)		CNC493029	Canada	Nunavut	Ellesmere Island, Hazen Camp	81.8167	-71.3	15 Jul. 1962	R. B. Madge		CNC
Cotesia hallii (Packard 1877)		CNC493030	Canada	Nunavut	Ellesmere Island, Hazen Camp	81.8167	-71.3	16 Jul. 1962	R. B. Madge		CNC
Cotesia hallii (Packard 1877)		CNC493031	Canada	Nunavut	Ellesmere Island, Hazen Camp	81.8167	-71.3	23 Jul. 1963	R. E. Leech		CNC
Cotesia hallii (Packard 1877)		CNC493032	Canada	Nunavut	Ellesmere Island, Hazen Camp	81.8167	-71.3	15 Jul. 1962	R. B. Madge		CNC
Cotesia hallii (Packard 1877)		CNC493033	Canada	Nunavut	Ellesmere Island, Alexandra Fiord	78.53	-75.55	11-20 Jul. 1982	Olga Kukal	pan trap	CNC	”Alexandra Fiord” can also be spelled ”Alexandra Fjord”
Cotesia hallii (Packard 1877)		CNC493034	Canada	Nunavut	Ellesmere Island, Alexandra Fiord	78.53	-75.55	2-10 Jul. 1982	Olga Kukal	pan trap	CNC	”Alexandra Fiord” can also be spelled ”Alexandra Fjord”
Cotesia hallii (Packard 1877)		CNC493035	Canada	Nunavut	Ellesmere Island, Alexandra Fiord	78.53	-75.55	2-10 Jul. 1982	Olga Kukal	pan trap	CNC	”Alexandra Fiord” can also be spelled ”Alexandra Fjord”
Cotesia hallii (Packard 1877)		CNC493036	Canada	Nunavut	Ellesmere Island, Alexandra Fiord	78.53	-75.55	2-10 Jul. 1982	Olga Kukal	pan trap	CNC	”Alexandra Fiord” can also be spelled ”Alexandra Fjord”
Cotesia hallii (Packard 1877)		CNC493037	Canada	Nunavut	Ellesmere Island, Alexandra Fiord	78.53	-75.55	2-10 Jul. 1982	Olga Kukal	pan trap	CNC	”Alexandra Fiord” can also be spelled ”Alexandra Fjord”
Cotesia hallii (Packard 1877)		CNC493038	Canada	Nunavut	Ellesmere Island, Alexandra Fiord	78.53	-75.55	2-10 Jul. 1982	Olga Kukal	pan trap	CNC	”Alexandra Fiord” can also be spelled ”Alexandra Fjord”
Cotesia hallii (Packard 1877)		CNC493039	Canada	Nunavut	Ellesmere Island, Alexandra Fiord	78.53	-75.55	2-10 Jul. 1982	Olga Kukal	pan trap	CNC	”Alexandra Fiord” can also be spelled ”Alexandra Fjord”
Cotesia hallii (Packard 1877)		CNC493040	Canada	Nunavut	Ellesmere Island, Alexandra Fiord	78.53	-75.55	2-10 Jul. 1982	Olga Kukal	pan trap	CNC	”Alexandra Fiord” can also be spelled ”Alexandra Fjord”
Cotesia hallii (Packard 1877)		CNC493041	Canada	Nunavut	Ellesmere Island, Alexandra Fiord	78.53	-75.55	2-10 Jul. 1982	Olga Kukal	pan trap	CNC	”Alexandra Fiord” can also be spelled ”Alexandra Fjord”
Cotesia hallii (Packard 1877)		CNC493042	Canada	Nunavut	Ellesmere Island, Alexandra Fiord	78.53	-75.55	2-10 Jul. 1982	Olga Kukal	pan trap	CNC	”Alexandra Fiord” can also be spelled ”Alexandra Fjord”
Cotesia hallii (Packard 1877)		CNC493043	Canada	Nunavut	Ellesmere Island, Alexandra Fiord	78.53	-75.55	2-10 Jul. 1982	Olga Kukal	pan trap	CNC	”Alexandra Fiord” can also be spelled ”Alexandra Fjord”
Cotesia hallii (Packard 1877)		CNC493044	Canada	Nunavut	Ellesmere Island, Alexandra Fiord	78.53	-75.55	2-10 Jul. 1982	Olga Kukal	pan trap	CNC	”Alexandra Fiord” can also be spelled ”Alexandra Fjord”
Cotesia hallii (Packard 1877)		CNC493045	Canada	Nunavut	Ellesmere Island, Alexandra Fiord	78.53	-75.55	2-10 Jul. 1982	Olga Kukal	pan trap	CNC	”Alexandra Fiord” can also be spelled ”Alexandra Fjord”
Cotesia hallii (Packard 1877)		CNC493046	Canada	Nunavut	Ellesmere Island, Alexandra Fiord	78.53	-75.55	2-10 Jul. 1982	Olga Kukal	pan trap	CNC	”Alexandra Fiord” can also be spelled ”Alexandra Fjord”
Cotesia hallii (Packard 1877)		CNC493047	Canada	Nunavut	Ellesmere Island, Alexandra Fiord	78.53	-75.55	11-20 Jul. 1982	Olga Kukal	pan trap	CNC	”Alexandra Fiord” can also be spelled ”Alexandra Fjord”
Cotesia hallii (Packard 1877)		CNC493048	Canada	Nunavut	Ellesmere Island, Alexandra Fiord	78.53	-75.55	20 Jul.-3 Aug. 1982	Olga Kukal	pan trap	CNC	”Alexandra Fiord” can also be spelled ”Alexandra Fjord”
Cotesia hallii (Packard 1877)		CNC493049	Canada	Nunavut	Ellesmere Island, Alexandra Fiord	78.53	-75.55	11-20 Jul. 1982	Olga Kukal	pan trap	CNC	”Alexandra Fiord” can also be spelled ”Alexandra Fjord”
Cotesia hallii (Packard 1877)		CNC493050	Canada	Nunavut	Ellesmere Island, Alexandra Fiord	78.53	-75.55	11-20 Jul. 1982	Olga Kukal	pan trap	CNC	”Alexandra Fiord” can also be spelled ”Alexandra Fjord”
Cotesia hallii (Packard 1877)		CNC493051	Canada	Nunavut	Ellesmere Island, Alexandra Fiord	78.53	-75.55	11-20 Jul. 1982	Olga Kukal	pan trap	CNC
Cotesia hallii (Packard 1877)		CNC493052	Canada	Nunavut	Ellesmere Island, Alexandra Fiord	78.53	-75.55	11-20 Jul. 1982	Olga Kukal	pan trap	CNC
Cotesia hallii (Packard 1877)		CNC493053	Canada	Nunavut	Ellesmere Island, Alexandra Fiord	78.53	-75.55	20 Jul.-3 Aug. 1982	Olga Kukal	pan trap	CNC
Cotesia hallii (Packard 1877)		CNC493054	Canada	Nunavut	Ellesmere Island, Alexandra Fiord	78.53	-75.55	20 Jul.-3 Aug. 1982	Olga Kukal	pan trap	CNC
Cotesia hallii (Packard 1877)		CNC493055	Canada	Nunavut	Ellesmere Island, Alexandra Fiord	78.53	-75.55	11-20 Jul. 1982	Olga Kukal	pan trap	CNC
Cotesia hallii (Packard 1877)		CNC493056	Canada	Nunavut	Ellesmere Island, Alexandra Fiord	78.53	-75.55	9 Jul. 1981	Olga Kukal	pan trap	CNC
Cotesia hallii (Packard 1877)		CNC493057	Canada	Nunavut	Ellesmere Island, Alexandra Fiord	78.53	-75.55	29 Jun. 1981	Olga Kukal	pan trap	CNC
Cotesia hallii (Packard 1877)		CNC493058	Canada	Nunavut	Ellesmere Island, Alexandra Fiord	78.53	-75.55	11-20 Jul. 1982	Olga Kukal	pan trap	CNC
Cotesia hallii (Packard 1877)		CNC493059	Canada	Nunavut	Ellesmere Island, Alexandra Fiord	78.53	-75.55	11-20 Jul. 1982	Olga Kukal	pan trap	CNC
Cotesia hallii (Packard 1877)		CNC493060	Canada	Nunavut	Ellesmere Island, Alexandra Fiord	78.53	-75.55	2 Jul. 1981	Olga Kukal	pan trap	CNC
Cotesia hallii (Packard 1877)		CNC493061	Canada	Nunavut	Ellesmere Island, Alexandra Fiord	78.53	-75.55	2-10 Jul. 1982	Olga Kukal	pan trap	CNC
Cotesia hallii (Packard 1877)		CNC493062	Canada	Nunavut	Ellesmere Island, Alexandra Fiord	78.53	-75.55	17 Jun.-3 Jul. 1982	Olga Kukal		CNC
Cotesia hallii (Packard 1877)		CNC493063	Canada	Nunavut	Ellesmere Island, Alexandra Fiord	78.53	-75.55	29 Jun. 1981	Olga Kukal	pan trap	CNC
Cotesia hallii (Packard 1877)		CNC493064	Canada	Nunavut	Ellesmere Island, Alexandra Fiord	78.53	-75.55	2-10 Jul. 1982	Olga Kukal	pan trap	CNC
Cotesia hallii (Packard 1877)		CNC493065	Canada	Nunavut	Ellesmere Island, Alexandra Fiord	78.53	-75.55	29 Jun. 1981	Olga Kukal	pan trap	CNC
Cotesia hallii (Packard 1877)		CNC493066	Canada	Nunavut	Ellesmere Island, Alexandra Fiord	78.53	-75.55	2-10 Jul. 1982	Olga Kukal	pan trap	CNC
Cotesia hallii (Packard 1877)		CNC493067	Canada	Nunavut	Ellesmere Island, Alexandra Fiord	78.53	-75.55	29 Jun. 1981	Olga Kukal	pan trap	CNC
Cotesia hallii (Packard 1877)		CNC493068	Canada	Nunavut	Ellesmere Island, Alexandra Fiord	78.53	-75.55	2 Jul. 1981	Olga Kukal	pan trap	CNC
Cotesia hallii (Packard 1877)		CNC493069	Canada	Nunavut	Ellesmere Island, Alexandra Fiord	78.53	-75.55	2 Jul. 1981	Olga Kukal	pan trap	CNC
Cotesia hallii (Packard 1877)		CNC493070	Canada	Nunavut	Ellesmere Island, Alexandra Fiord	78.53	-75.55	9 Jul. 1981	Olga Kukal	pan trap	CNC
Cotesia hallii (Packard 1877)		CNC493071	Canada	Nunavut	Ellesmere Island, Alexandra Fiord	78.53	-75.55	9 Jul. 1981	Olga Kukal	pan trap	CNC
Cotesia hallii (Packard 1877)		CNC493072	Canada	Nunavut	Ellesmere Island, Alexandra Fiord	78.53	-75.55	9 Jul. 1981	Olga Kukal	pan trap	CNC
Cotesia hallii (Packard 1877)		CNC493073	Canada	Nunavut	Ellesmere Island, Alexandra Fiord	78.53	-75.55	2 Jul. 1981	Olga Kukal	pan trap	CNC
Cotesia hallii (Packard 1877)		CNC493074	Canada	Nunavut	Baffin Island, Clyde	70.41	-68.58	24 Jul. 1958	J.E.H. Martin		CNC
Cotesia hallii (Packard 1877)		CNC493075	Canada	Nunavut	Baffin Island, Clyde	70.41	-68.58	4 Aug. 1958	J.E.H. Martin		CNC
Cotesia hallii (Packard 1877)		CNC493076	Canada	Nunavut	Baffin Island, Clyde	70.41	-68.58	10 Jul. 1958	J.E.H. Martin		CNC
Cotesia hallii (Packard 1877)		CNC493077	Canada	Nunavut	Baffin Island, Clyde	70.41	-68.58	5 Jul. 1958	J.E.H. Martin		CNC
Cotesia hallii (Packard 1877)		CNC493078	Canada	Nunavut	Baffin Island, Clyde	70.41	-68.58	25 Jul. 1958	J.E.H. Martin		CNC
Cotesia hallii (Packard 1877)		CNC493079	Canada	Nunavut	Baffin Island, Clyde	70.41	-68.58	25 Jul. 1958	J.E.H. Martin		CNC
Cotesia hallii (Packard 1877)		CNC493080	Canada	Nunavut	Baffin Island, Clyde	70.41	-68.58	25 Jul. 1958	J.E.H. Martin		CNC
Cotesia hallii (Packard 1877)		CNC493081	Canada	Nunavut	Baffin Island, Clyde	70.41	-68.58	10 Jul. 1958	J.E.H. Martin		CNC
Cotesia hallii (Packard 1877)		CNC493082	Canada	Nunavut	Baffin Island, Clyde	70.41	-68.58	13 Aug. 1958	J.E.H. Martin		CNC
Cotesia hallii (Packard 1877)		CNC493083	Canada	Nunavut	Baffin Island, Clyde	70.41	-68.58	25 Jul. 1958	J.E.H. Martin		CNC
Cotesia hallii (Packard 1877)		CNC493084	Canada	Nunavut	Baffin Island, Clyde	70.41	-68.58	25 Jun. 1958	J.E.H. Martin		CNC
Cotesia hallii (Packard 1877)		CNC493085	Canada	Nunavut	Baffin Island, Clyde	70.41	-68.58	3 Jul. 1958	J.E.H. Martin		CNC
Cotesia hallii (Packard 1877)		CNC493086	Canada	Nunavut	Baffin Island, Iqaluit	63.45	-68.31	10-11 Aug. 1959	W.R.M. Mason		CNC
Cotesia hallii (Packard 1877)		CNC493087	Canada	Nunavut	Baffin Island, Clyde	70.41	-68.58	22 Jul. 1958	J.E.H. Martin		CNC
Cotesia hallii (Packard 1877)		CNC493088	Canada	Nunavut	Baffin Island, Clyde	70.41	-68.58	5 Jul. 1958	J.E.H. Martin		CNC
Cotesia hallii (Packard 1877)		CNC493089	Canada	Nunavut	Baffin Island, Clyde	70.41	-68.58	5 Jul. 1958	J.E.H. Martin		CNC
Cotesia hallii (Packard 1877)		CNC493090	Canada	Nunavut	Baffin Island, Clyde	70.41	-68.58	2 Aug. 1958	J.E.H. Martin		CNC
Cotesia hallii (Packard 1877)		CNC493091	Canada	Nunavut	Baffin Island, Head of Clyde Inlet	70.29	-68.31	7 Aug. 1958	J.E.H. Martin		CNC
Cotesia hallii (Packard 1877)		CNC493092	Canada	Nunavut	Baffin Island, Clyde	70.41	-68.58	24 Jul. 1958	J.E.H. Martin		CNC
Cotesia hallii (Packard 1877)		CNC493093	Canada	Nunavut	Baffin Island, Clyde	70.41	-68.58	24 Jul. 1958	J.E.H. Martin		CNC
Cotesia hallii (Packard 1877)		CNC493094	Canada	Nunavut	Baffin Island, Clyde	70.41	-68.58	5 Jul. 1958	J.E.H. Martin		CNC
Cotesia hallii (Packard 1877)		CNC493095	Canada	Nunavut	Baffin Island, Clyde	70.41	-68.58	5 Jul. 1958	J.E.H. Martin		CNC
Cotesia hallii (Packard 1877)		CNC493096	Canada	Nunavut	Baffin Island, Clyde	70.41	-68.58	27 Jul. 1958	J.E.H. Martin		CNC
Cotesia hallii (Packard 1877)		CNC493097	Canada	Nunavut	Baffin Island, Clyde	70.41	-68.58	27 Jul. 1958	J.E.H. Martin		CNC
Cotesia hallii (Packard 1877)		CNC493098	Canada	Northwest Territories	Victoria Island	71.2833	-114	23-28 Jul. 1975	G. & M. Wood		CNC	71° 17' N, 114° W
Cotesia hallii (Packard 1877)		CNC493099	Canada	Northwest Territories	Victoria Island	71.2833	-114	1-5 Jul. 1975	G. & M. Wood		CNC	71° 17' N, 114° W
Cotesia hallii (Packard 1877)		CNC493100	Canada	Northwest Territories	Victoria Island	71.2833	-114	1-5 Jul. 1975	G. & M. Wood		CNC	71° 17' N, 114° W
Cotesia hallii (Packard 1877)		CNC493101	Canada	Northwest Territories	Victoria Island	71.2833	-114	23-28 Jul. 1975	G. & M. Wood		CNC	71° 17' N, 114° W
Cotesia hallii (Packard 1877)		CNC493102	Canada	Northwest Territories	Banks Island, Masik River	71.5333	-123.8	14 Jul. 1968	W.R.M. Mason	Malaise trap	CNC
Cotesia hallii (Packard 1877)		CNC493103	Canada	Northwest Territories	Victoria Island	71.2833	-114	11-15 Jul. 1975	G. & M. Wood		CNC
Cotesia hallii (Packard 1877)		CNC493104	Canada	Northwest Territories	Victoria Island	71.2833	-114	11-15 Jul. 1975	G. & M. Wood		CNC
Cotesia hallii (Packard 1877)		CNC493105	Canada	Northwest Territories	Victoria Island	71.2833	-114	11-15 Jul. 1975	G. & M. Wood		CNC
Cotesia hallii (Packard 1877)		CNC493106	Canada	Nunavut	Ellesmere Island, Alexandra Fiord	78.53	-75.55	9 Jul. 1981	Olga Kukal	pan trap	CNC
Cotesia hallii (Packard 1877)		CNC493107	Canada	Northwest Territories	Victoria Island	71.2833	-114	11-15 Jul. 1975	G. & M. Wood	pan trap	CNC	pan traps on s. tundra slope
Cotesia hallii (Packard 1877)		CNC493108	Canada	Nunavut	Ellesmere Island	79.4833	-75.8333	8 Aug. 1980	J.R. Smith		CNC
Cotesia hallii (Packard 1877)		CNC493109	Canada	Northwest Territories	Victoria Island	71.2833	-114	8-10 Jul. 1975	G. & M. Wood	pan trap	CNC	pan traps on south facing tundra slope
Cotesia hallii (Packard 1877)		CNC493110	Canada	Northwest Territories	Victoria Island	71.2833	-114	11-15 Jul. 1975	G. & M. Wood	pan trap	CNC	pan traps on s. tundra slope
Cotesia hallii (Packard 1877)		CNC493111	Canada	Northwest Territories	Victoria Island	71.2833	-114	11-15 Jul. 1975	G. & M. Wood		CNC
Cotesia hallii (Packard 1877)		CNC493112	Canada	Northwest Territories	Victoria Island	71.2833	-114	11-15 Jul. 1975	G. & M. Wood		CNC
Cotesia hallii (Packard 1877)		CNC493113	Canada	Northwest Territories	Victoria Island	71.2833	-114	11-15 Jul. 1975	G. & M. Wood		CNC
Cotesia hallii (Packard 1877)		CNC493114	Canada	Northwest Territories	Victoria Island	71.2833	-114	11-15 Jul. 1975	G. & M. Wood		CNC
Cotesia hallii (Packard 1877)		CNC493115	Canada	Northwest Territories	Victoria Island	71.2833	-114	23-28 Jul. 1975	G. & M. Wood		CNC
Cotesia hallii (Packard 1877)		CNC493116	Canada	Northwest Territories	Victoria Island	71.2833	-114	11-15 Jul. 1975	G. & M. Wood		CNC
Cotesia hallii (Packard 1877)		CNC493117	Canada	Northwest Territories	Victoria Island	71.2833	-114	11-15 Jul. 1975	G. & M. Wood		CNC
Cotesia hallii (Packard 1877)		CNC493118	Canada	Nunavut	Ellesmere Island	79.4833	-75.8333	11 Jul. 1980	J.R. Smith		CNC
Cotesia hallii (Packard 1877)		CNC493119	Canada	Northwest Territories	Banks Island, Masik River	71.5333	-123.8	16 Jul. 1968	W.R.M. Mason	Malaise trap	CNC
Cotesia hallii (Packard 1877)		CNC493120	Canada	Northwest Territories	Victoria Island	71.2833	-114	11-15 Jul. 1975	G. & M. Wood		CNC
Cotesia hallii (Packard 1877)		CNC493121	Canada	Nunavut	Ellesmere Island, Fosheim Peninsula, Hot Weather Creek	79.9667	-84.4667	28 Jul. 1991	F. Brodo		CNC
Cotesia hallii (Packard 1877)		CNC493122	Canada	Nunavut	Ellesmere Island, Fosheim Peninsula, Hot Weather Creek	79.9667	-84.4667	23 Jul. 1991	F. Brodo		CNC
Cotesia hallii (Packard 1877)		CNC493123	Canada	Nunavut	Ellesmere Island, Fosheim Peninsula, Hot Weather Creek	79.9667	-84.4667	28 Jul. 1991	F. Brodo		CNC
Cotesia hallii (Packard 1877)		CNC493124	Canada	Nunavut	Ellesmere Island, Fosheim Peninsula, Hot Weather Creek	79.9667	-84.4667	23 Jul. 1991	F. Brodo		CNC
Cotesia hallii (Packard 1877)		CNC493125	Canada	Nunavut	Ellesmere Island, Fosheim Peninsula, Hot Weather Creek	79.9667	-84.4667	7 Aug. 1991	F. Brodo		CNC
Cotesia hallii (Packard 1877)		CNC493126	Greenland		Nedre Midsommer Sö	82.15	-34.15	9 Jul. 1966	Canada Peary Land Expd.		CNC
Cotesia hallii (Packard 1877)		CNC493127	Canada	Nunavut	Ellesmere Island, Fosheim Peninsula, Hot Weather Creek	79.9667	-84.4667	13 Jul. 1991	F. Brodo		CNC
Cotesia hallii (Packard 1877)		CNC493128	Canada	Nunavut	Ellesmere Island, Fosheim Peninsula, Hot Weather Creek	79.9667	-84.4667	16 Jul. 1991	F. Brodo		CNC
Cotesia hallii (Packard 1877)		CNC493129	Canada	Northwest Territories	Banks Island, Masik River	71.5333	-123.8	14 Jul. 1968	W.R.M. Mason	Malaise trap	CNC
Cotesia hallii (Packard 1877)		CNC493130	Canada	Nunavut	Baffin Island, Clyde	70.41	-68.58	24 Jul. 1958	J.E.H. Martin		CNC
Cotesia hallii (Packard 1877)		CNC493131	Canada	Northwest Territories	Banks Island, Masik River	71.5333	-123.8	29 Jul. 1968	W.R.M. Mason		CNC
Cotesia hallii (Packard 1877)		CNC493132	Canada	Northwest Territories	Banks Island, Masik River	71.5333	-123.8	30 Jul. 1968	W.R.M. Mason		CNC
Cotesia hallii (Packard 1877)		CNC493133	Canada	Nunavut	Baffin Island, Clyde	70.41	-68.58	4 Aug. 1958	J.E.H. Martin		CNC
Cotesia hallii (Packard 1877)		CNC493134	Canada	Northwest Territories	Banks Island, Masik River	71.5333	-123.8	30 Jul. 1968	W.R.M. Mason		CNC
Cotesia hallii (Packard 1877)		CNC493135	Canada	Northwest Territories	Banks Island, Masik River	71.5333	-123.8	28 Jul. 1968	W.R.M. Mason		CNC
Cotesia hallii (Packard 1877)		CNC493136	Canada	Northwest Territories	Banks Island, Masik River	71.5333	-123.8	29 Jul. 1968	W.R.M. Mason		CNC
Cotesia hallii (Packard 1877)		CNC493137	Canada	Northwest Territories	Banks Island, Masik River	71.5333	-123.8	17 Jul. 1968	W.R.M. Mason	pan trap	CNC
Cotesia hallii (Packard 1877)		CNC493138	Canada	Northwest Territories	Banks Island, Masik River	71.5333	-123.8	29 Jul. 1968	W.R.M. Mason		CNC
Cotesia hallii (Packard 1877)		CNC493139	Canada	Northwest Territories	Banks Island, Masik River	71.5333	-123.8	29 Jul. 1968	W.R.M. Mason		CNC
Cotesia hallii (Packard 1877)		CNC493140	Canada	Northwest Territories	Banks Island, Masik River	71.5333	-123.8	28 Jul. 1968	W.R.M. Mason		CNC
Cotesia hallii (Packard 1877)		CNC493141	Canada	Northwest Territories	Banks Island, Masik River	71.5333	-123.8	27 Jul. 1968	W.R.M. Mason	Malaise trap	CNC
Cotesia hallii (Packard 1877)		CNC493142	Canada	Northwest Territories	Banks Island, Masik River	71.5333	-123.8	24 Jul. 1968	W.R.M. Mason	pan trap	CNC
Cotesia hallii (Packard 1877)		CNC493143	Canada	Nunavut	Ellesmere Island, Hazen Camp	81.8167	-71.3	15 Jul. 1961	D.R. Oliver		CNC
Cotesia hallii (Packard 1877)		CNC493144	Canada	Nunavut	Ellesmere Island, Hazen Camp	81.8167	-71.3	2 Aug. 1962	R.B. Madge		CNC
Cotesia hallii (Packard 1877)		CNC493145	Canada	Nunavut	Ellesmere Island, Hazen Camp	81.8167	-71.3	28 Jun. 1962	R. Madge		CNC
Cotesia hallii (Packard 1877)		CNC493146	Canada	Nunavut	Ellesmere Island, Hazen Camp	81.8167	-71.3	1 Jul. 1962	R.B. Madge		CNC
Cotesia hallii (Packard 1877)		CNC493147	Canada	Nunavut	Ellesmere Island, Hazen Camp	81.8167	-71.3	1 Jul. 1962	R.B. Madge		CNC
Cotesia hallii (Packard 1877)		CNC493148	Canada	Nunavut	Ellesmere Island, Hazen Camp	81.8167	-71.3	21 Aug. 1963	R.E. Leech		CNC
Cotesia hallii (Packard 1877)		CNC493149	Canada	Nunavut	Ellesmere Island, Hazen Camp	81.8167	-71.3	24 Jul. 1963	R.E. Leech		CNC
Cotesia hallii (Packard 1877)		CNC493150	Canada	Nunavut	Ellesmere Island, Hazen Camp	81.8167	-71.3	11 Jul. 1963	R.E. Leech		CNC
Cotesia hallii (Packard 1877)		CNC493151	Canada	Nunavut	Ellesmere Island, Hazen Camp	81.8167	-71.3	7 Jul. 1963	R.E. Leech		CNC
Cotesia hallii (Packard 1877)		CNC493152	Canada	Nunavut	Ellesmere Island, Hazen Camp	81.8167	-71.3	21 Aug. 1963	R.E. Leech		CNC
Cotesia hallii (Packard 1877)		CNC493153	Canada	Nunavut	Ellesmere Island, Hazen Camp	81.8167	-71.3	21 Aug. 1963	R.E. Leech		CNC
Cotesia hallii (Packard 1877)		CNC493154	Canada	Nunavut	Ellesmere Island, Hazen Camp	81.8167	-71.3	24 Jul. 1963	R.E. Leech		CNC
Cotesia hallii (Packard 1877)		CNC493155	Canada	Nunavut	Ellesmere Island, Hazen Camp	81.8167	-71.3	19 Aug. 1963	R.E. Leech		CNC
Cotesia hallii (Packard 1877)		CNC493156	Canada	Nunavut	Ellesmere Island, Hazen Camp	81.8167	-71.3	21 Aug. 1963	R.E. Leech		CNC
Cotesia hallii (Packard 1877)		CNC493157	Canada	Nunavut	Ellesmere Island, Hazen Camp	81.8167	-71.3	15 Jul. 1963	R.E. Leech		CNC
Cotesia hallii (Packard 1877)		CNC493158	Canada	Nunavut	Ellesmere Island, Hazen Camp	81.8167	-71.3	24 Jul. 1963	R.E. Leech		CNC
Cotesia hallii (Packard 1877)		CNC493159	Canada	Nunavut	Ellesmere Island, Hazen Camp	81.8167	-71.3	19 Jul. 1963	R.E. Leech		CNC
Cotesia hallii (Packard 1877)		CNC493160	Canada	Nunavut	Ellesmere Island, Hazen Camp	81.8167	-71.3	31 Jul. 1963	R.E. Leech		CNC
Cotesia hallii (Packard 1877)		CNC493161	Canada	Nunavut	Ellesmere Island, Hazen Camp	81.8167	-71.3	15 Jul. 1963	R.E. Leech		CNC
Cotesia hallii (Packard 1877)		CNC493162	Canada	Nunavut	Ellesmere Island, Hazen Camp	81.8167	-71.3	15 Jul. 1963	R.E. Leech		CNC
Cotesia hallii (Packard 1877)		CNC493163	Canada	Nunavut	Ellesmere Island, Hazen Camp	81.8167	-71.3	15 Jul. 1963	R.E. Leech		CNC
Cotesia hallii (Packard 1877)		CNC493164	Canada	Nunavut	Ellesmere Island, Hazen Camp	81.8167	-71.3	31 Jul. 1963	R.E. Leech		CNC
Cotesia hallii (Packard 1877)		CNC493165	Canada	Nunavut	Ellesmere Island, Hazen Camp	81.8167	-71.3	15 Jul. 1963	R.E. Leech		CNC
Cotesia hallii (Packard 1877)		CNC493166	Canada	Nunavut	Ellesmere Island, Hazen Camp	81.8167	-71.3	24 Jul. 1963	R.E. Leech		CNC
Cotesia hallii (Packard 1877)		CNC493167	Canada	Nunavut	Ellesmere Island, Hazen Camp	81.8167	-71.3	19 Jul. 1963	R.E. Leech		CNC
Cotesia hallii (Packard 1877)		CNC493168	Canada	Nunavut	Ellesmere Island, Hazen Camp	81.8167	-71.3	19 Jul. 1963	R.E. Leech		CNC
Cotesia hallii (Packard 1877)		CNC493169	Canada	Nunavut	Ellesmere Island, Hazen Camp	81.8167	-71.3	15 Jul. 1963	R.E. Leech		CNC
Cotesia hallii (Packard 1877)		CNC493170	Canada	Nunavut	Ellesmere Island, Hazen Camp	81.8167	-71.3	31 Jul. 1963	R.E. Leech		CNC
Cotesia hallii (Packard 1877)		CNC493171	Canada	Nunavut	Ellesmere Island, Hazen Camp	81.8167	-71.3	15 Jul. 1963	R.E. Leech		CNC
Cotesia hallii (Packard 1877)		CNC493172	Canada	Nunavut	Ellesmere Island, Hazen Camp	81.8167	-71.3	15 Jul. 1963	R.E. Leech		CNC
Cotesia hallii (Packard 1877)		CNC493173	Canada	Nunavut	Ellesmere Island, Hazen Camp	81.8167	-71.3	19 Jul. 1963	R.E. Leech		CNC
Cotesia hallii (Packard 1877)		CNC493174	Canada	Nunavut	Ellesmere Island, Hazen Camp	81.8167	-71.3	11 Jul. 1963	R.E. Leech		CNC
Cotesia hallii (Packard 1877)		CNC493175	Canada	Nunavut	Ellesmere Island, Hazen Camp	81.8167	-71.3	11 Jul. 1963	R.E. Leech		CNC
Cotesia hallii (Packard 1877)		CNC493176	Canada	Nunavut	Ellesmere Island, Hazen Camp	81.8167	-71.3	27 Jul. 1963	R.E. Leech		CNC
Cotesia hallii (Packard 1877)		CNC493177	Canada	Nunavut	Ellesmere Island, Hazen Camp	81.8167	-71.3	31 Jul. 1963	R.E. Leech		CNC
Cotesia hallii (Packard 1877)		CNC493178	Canada	Nunavut	Ellesmere Island, Hazen Camp	81.8167	-71.3	19 Jul. 1963	R.E. Leech		CNC
Cotesia hallii (Packard 1877)		CNC493179	Canada	Nunavut	Ellesmere Island, Hazen Camp	81.8167	-71.3	31 Jul. 1963	R.E. Leech		CNC
Cotesia hallii (Packard 1877)		CNC493180	Canada	Nunavut	Ellesmere Island, Hazen Camp	81.8167	-71.3	15 Jul. 1963	R.E. Leech		CNC
Cotesia hallii (Packard 1877)		CNC493181	Canada	Nunavut	Ellesmere Island, Hazen Camp	81.8167	-71.3	11 Jul. 1963	R.E. Leech		CNC
Cotesia hallii (Packard 1877)		CNC493182	Canada	Nunavut	Ellesmere Island, Hazen Camp	81.8167	-71.3	1 Jul. 1963	R.E. Leech		CNC
Cotesia hallii (Packard 1877)		CNC493183	Canada	Nunavut	Ellesmere Island, Hazen Camp	81.8167	-71.3	1 Jul. 1963	R.E. Leech		CNC
Cotesia hallii (Packard 1877)		CNC493184	Canada	Nunavut	Ellesmere Island, Hazen Camp	81.8167	-71.3	26 Jul. 1963	R.E. Leech		CNC
Cotesia hallii (Packard 1877)		CNC493185	Canada	Nunavut	Ellesmere Island, Hazen Camp	81.8167	-71.3	26 Jul. 1963	R.E. Leech		CNC
Cotesia hallii (Packard 1877)		CNC493186	Canada	Nunavut	Baffin Island, Clyde	70.41	-68.58	4 Aug. 1958	J.E.H. Martin		CNC
Cotesia hallii (Packard 1877)		CNC493187	Greenland		Nedre Midsommer Sö	82.15	-34.15	28 Jun. 1966	Can. Peary Land Expd.		CNC
Cotesia hallii (Packard 1877)		CNC493188	Canada	Northwest Territories	Banks Island, Masik River	71.5333	-123.8	30 Jul. 1968	W.R.M. Mason		CNC
Cotesia hallii (Packard 1877)		CNC493189	Canada	Northwest Territories	Banks Island, Masik River	71.5333	-123.8	17 Jul. 1968	W.R.M. Mason	Malaise trap	CNC
Cotesia hallii (Packard 1877)		CNC493190	Canada	Northwest Territories	Banks Island, Masik River	71.5333	-123.8	31 Jul. 1968	W.R.M. Mason	Malaise trap	CNC
Cotesia hallii (Packard 1877)		CNC493191	Canada	Nunavut	Ellesmere Island	79.4833	-75.8333	1 Aug. 1980	J.R. Smith		CNC
Cotesia hallii (Packard 1877)		CNC493192	Canada	Northwest Territories	Banks Island, Masik River	71.5333	-123.8	29 Jul. 1968	W.R.M. Mason		CNC
Cotesia hallii (Packard 1877)		CNC493193	Canada	Northwest Territories	Banks Island, Masik River	71.5333	-123.8	31 Jul. 1968	W.R.M. Mason	Malaise trap	CNC
Cotesia hallii (Packard 1877)		CNC493194	Canada	Northwest Territories	Victoria Island	71.2833	-114	1-5 Jul. 1975	G. & M. Wood		CNC
Cotesia hallii (Packard 1877)		CNC493195	Canada	Nunavut	Ellesmere Island, Alexandra Fiord	78.53	-75.55	2-10 Jul. 1982	Olga Kukal	pan trap	CNC
Cotesia hallii (Packard 1877)		CNC493196	Canada	Nunavut	Ellesmere Island, Alexandra Fiord	78.53	-75.55	20 Jul.-3 Aug. 1982	Olga Kukal	pan trap	CNC
Cotesia hallii (Packard 1877)		CNC493197	Canada	Nunavut	Ellesmere Island, Hazen Camp R.	81.8167	-71.3	1 Jul. 1962	R.B. Madge		CNC
Cotesia hallii (Packard 1877)		CNC493198	Canada	Northwest Territories	Banks Island, Masik River	71.5333	-123.8	31 Jul. 1968	W.R.M. Mason	Malaise trap	CNC
Cotesia hallii (Packard 1877)		CNC493199	Canada	Northwest Territories	Banks Island, Masik River	71.5333	-123.8	31 Jul. 1968	W.R.M. Mason	Malaise trap	CNC
Cotesia hallii (Packard 1877)		CNC493200	Canada	Northwest Territories	Banks Island, Masik River	71.5333	-123.8	8-12 Jul. 1968	W.R.M. Mason	Malaise trap	CNC
Cotesia hallii (Packard 1877)		CNC493201	Canada	Northwest Territories	Banks Island, Masik River	71.5333	-123.8	8-12 Jul. 1968	W.R.M. Mason	Malaise trap	CNC
Cotesia hallii (Packard 1877)		CNC493202	Canada	Northwest Territories	Banks Island, Masik River	71.5333	-123.8	8-12 Jul. 1968	W.R.M. Mason	Malaise trap	CNC
Cotesia hallii (Packard 1877)		CNC493203	Canada	Nunavut	Ellesmere Island, Hazen Camp	81.8167	-71.3	11 Jul. 1963	R.E. Leech		CNC
Cotesia hallii (Packard 1877)		CNC493204	Canada	Nunavut	Ellesmere Island, Hazen Camp	81.8167	-71.3	31 Jul. 1963	R.E. Leech		CNC
Cotesia hallii (Packard 1877)		CNC493205	Canada	Nunavut	Ellesmere Island, Hazen Camp	81.8167	-71.3	19 Aug. 1963	R.E. Leech		CNC
Cotesia hallii (Packard 1877)		CNC493206	Canada	Nunavut	Axel Heiberg Island, Gypsum Hill	79.4167	-90.75	20 Jul. 1963	H.K. Rutz		CNC
Cotesia hallii (Packard 1877)		CNC493207	Greenland		Nedre Midsommer Sö	82.15	-34.15	25 Jul. 1966	Can. Peary Land Expd.		CNC
Cotesia hallii (Packard 1877)		CNC493208	Greenland		Nedre Midsommer Sö	82.15	-34.15	2 Jul. 1966	Can. Peary Land Expd.		CNC
Cotesia hallii (Packard 1877)		CNC493209	Greenland		Nedre Midsommer Sö	82.15	-34.15	25 Jul. 1966	Can. Peary Land Expd.		CNC
Cotesia hallii (Packard 1877)		CNC493210	Canada	Nunavut	Ellesmere Island, Hazen Camp	81.8167	-71.3	15 Jul. 1961	D.R. Oliver		CNC
Cotesia hallii (Packard 1877)		CNC497199	Canada	Northwest Territories	Banks Island, Masik River	71.5333	-123.8	31 Jul. 1968	W.R.M. Mason	pan trap	CNC
Cotesia hallii (Packard 1877)		CNC497200	Canada	Northwest Territories	Banks Island, Masik River	71.5333	-123.8	29 Jul. 1968	W.R.M. Mason		CNC
Cotesia hallii (Packard 1877)		CNC497201	Canada	Northwest Territories	Banks Island, Masik River	71.5333	-123.8	28 Jul. 1968	W.R.M. Mason	pan trap	CNC
Cotesia hallii (Packard 1877)		CNC497202	Canada	Northwest Territories	Banks Island, Masik River	71.5333	-123.8	31 Jul. 1968	W.R.M. Mason	pan trap	CNC
Cotesia hallii (Packard 1877)		CNC497203	Canada	Northwest Territories	Banks Island, Masik River	71.5333	-123.8	29 Jul. 1968	W.R.M. Mason		CNC
Cotesia hallii (Packard 1877)		CNC497204	Canada	Northwest Territories	Banks Island, Masik River	71.5333	-123.8	28 Jul. 1968	W.R.M. Mason		CNC
Cotesia hallii (Packard 1877)		CNC497205	Canada	Northwest Territories	Banks Island, Masik River	71.5333	-123.8	28 Jul. 1968	W.R.M. Mason		CNC
Cotesia hallii (Packard 1877)		CNC497206	Canada	Northwest Territories	Banks Island, Masik River	71.5333	-123.8	17 Jul. 1968	W.R.M. Mason	Malaise trap	CNC
Cotesia hallii (Packard 1877)		CNC497207	Canada	Northwest Territories	Banks Island, Masik River	71.5333	-123.8	30 Jul. 1968	W.R.M. Mason		CNC
Cotesia hallii (Packard 1877)		CNC497208	Greenland		Nedre Midsommer Sö	82.15	-34.15	21 Jun. 1966	Can. Peary Land Expd.		CNC
Cotesia hallii (Packard 1877)		CNC497209	Canada	Nunavut	Baffin Island, Iqaluit	63.45	-68.31	22 Jul. 1948	F. G. DiLabio		CNC
Cotesia hallii (Packard 1877)		CNC497210	Canada	Nunavut	Ellesmere Island	79.4833	-75.8333	1 Aug. 1980	J.R. Smith		CNC
Cotesia hallii (Packard 1877)		CNC497211	Canada	Nunavut	Ellesmere Island	79.4833	-75.8333	11 Jul. 1980	J.R. Smith		CNC
Cotesia hallii (Packard 1877)		CNC497212	Canada	Nunavut	Baffin Island, Clyde	70.41	-68.58	4 Aug. 1958	J.E.H. Martin		CNC
Cotesia hallii (Packard 1877)		CNC497213	Canada	Nunavut	Baffin Island, Clyde	70.41	-68.58	27 Jul. 1958	J.E.H. Martin		CNC
Cotesia hallii (Packard 1877)		CNC497214	Canada	Nunavut	Baffin Island, Clyde	70.41	-68.58	27 Jul. 1958	J.E.H. Martin		CNC
Cotesia hallii (Packard 1877)		CNC497215	Canada	Nunavut	Ellesmere Island, Alexandra Fiord	78.53	-75.55	2 Jul. 1981	Olga Kukal	pan trap	CNC
Cotesia hallii (Packard 1877)		CNC497216	Canada	Nunavut	Ellesmere Island, Alexandra Fiord	78.53	-75.55	3 Aug. 1981	Olga Kukal	pan trap	CNC
Cotesia hallii (Packard 1877)		CNC497217	Canada	Nunavut	Ellesmere Island, Alexandra Fiord	78.53	-75.55	20 Jul.-3 Aug. 1982	Olga Kukal	pan trap	CNC
Cotesia hallii (Packard 1877)		CNC497218	Canada	Nunavut	Ellesmere Island, Alexandra Fiord	78.53	-75.55	20 Jul.-3 Aug. 1982	Olga Kukal	pan trap	CNC
Cotesia hallii (Packard 1877)		CNC497219	Canada	Nunavut	Ellesmere Island, Alexandra Fiord	78.53	-75.55	20 Jul.-3 Aug. 1982	Olga Kukal	pan trap	CNC
Cotesia hallii (Packard 1877)		CNC497220	Canada	Nunavut	Ellesmere Island, Alexandra Fiord	78.53	-75.55	20 Jul. 1982	Olga Kukal		CNC
Cotesia hallii (Packard 1877)		CNC497221	Canada	Nunavut	Ellesmere Island	79.4833	-75.8333	11 Jul. 1980	J.R. Smith		CNC
Cotesia hallii (Packard 1877)		CNC497222	Canada	Northwest Territories	Victoria Island	71.2833	-114	11-15 Jul. 1975	G. & M. Wood		CNC
Cotesia hallii (Packard 1877)		CNC497223	Canada	Northwest Territories	Victoria Island	71.2833	-114	11-15 Jul. 1975	G. & M. Wood		CNC
Cotesia hallii (Packard 1877)		CNC497224	Canada	Northwest Territories	Victoria Island	71.2833	-114	11-15 Jul. 1975	G. & M. Wood		CNC
Cotesia hallii (Packard 1877)		CNC497225	Canada	Northwest Territories	Victoria Island	71.2833	-114	11-15 Jul. 1975	G. & M. Wood		CNC
Cotesia hallii (Packard 1877)		CNC497226	Canada	Northwest Territories	Banks Island, Masik River	71.5333	-123.8	29 Jul. 1968	W.R.M. Mason		CNC
Cotesia hallii (Packard 1877)		CNC497227	Canada	Northwest Territories	Banks Island, Masik River	71.5333	-123.8	26 Jul. 1968	W.R.M. Mason	pan trap	CNC
Cotesia hallii (Packard 1877)		CNC497228	Canada	Nunavut	Baffin Island, Iqaluit	63.45	-68.31	10-11 Aug. 1959	W.R.M. Mason		CNC
Cotesia hallii (Packard 1877)		CNC497229	Canada	Nunavut	Baffin Island, Clyde	70.41	-68.58	25 Jul. 1958	J.E.H. Martin		CNC
Cotesia hallii (Packard 1877)		CNC497230	Canada	Nunavut	Baffin Island, Clyde	70.41	-68.58	13 Aug. 1958	J.E.H. Martin		CNC
Cotesia hallii (Packard 1877)		CNC497231	Canada	Nunavut	Baffin Island, Clyde	70.41	-68.58	4 Aug. 1958	J.E.H. Martin		CNC
Cotesia hallii (Packard 1877)		CNC497232	Canada	Nunavut	Baffin Island, Iqaluit	63.45	-68.31	10-11 Aug. 1959	W.R.M. Mason		CNC
Cotesia hallii (Packard 1877)		CNC497233	Canada	Nunavut	Baffin Island, Clyde	70.41	-68.58	25 Jul. 1958	J.E.H. Martin		CNC
Cotesia hallii (Packard 1877)		CNC497234	Canada	Nunavut	Baffin Island, Clyde	70.41	-68.58	23 Jul. 1958	J.E.H. Martin		CNC
Cotesia hallii (Packard 1877)		CNC497235	Canada	Nunavut	Baffin Island, Iqaluit	63.45	-68.31	10-11 Aug. 1959	W.R.M. Mason		CNC
Cotesia hallii (Packard 1877)		CNC497236	Canada	Nunavut	Baffin Island, Clyde	70.41	-68.58	4 Aug. 1958	J.E.H. Martin		CNC
Cotesia hallii (Packard 1877)		CNC497237	Canada	Nunavut	Baffin Island, Clyde	70.41	-68.58	4 Aug. 1958	J.E.H. Martin		CNC
Cotesia hallii (Packard 1877)		CNC497238	Canada	Nunavut	Baffin Island, Clyde	70.41	-68.58	25 Jul. 1958	J.E.H. Martin		CNC
Cotesia hallii (Packard 1877)		CNC497239	Canada	Nunavut	Baffin Island, Clyde	70.41	-68.58	25 Jul. 1958	J.E.H. Martin		CNC
Cotesia hallii (Packard 1877)		CNC497240	Canada	Nunavut	Baffin Island, Clyde	70.41	-68.58	25 Jul. 1958	J.E.H. Martin		CNC
Cotesia hallii (Packard 1877)		CNC497241	Canada	Nunavut	Baffin Island, Clyde	70.41	-68.58	24 Jul. 1958	J.E.H. Martin		CNC
Cotesia hallii (Packard 1877)		CNC497242	Canada	Nunavut	Baffin Island, Clyde	70.41	-68.58	25 Jul. 1958	J.E.H. Martin		CNC
Cotesia hallii (Packard 1877)		CNC497243	Canada	Nunavut	Baffin Island, Clyde	70.41	-68.58	25 Jul. 1958	J.E.H. Martin		CNC
Cotesia hallii (Packard 1877)		CNC497244	Canada	Nunavut	Baffin Island, Clyde	70.41	-68.58	26 Jul. 1958	J.E.H. Martin		CNC
Cotesia hallii (Packard 1877)		CNC497245	Canada	Nunavut	Baffin Island, Clyde	70.41	-68.58	25 Jul. 1958	J.E.H. Martin		CNC
Cotesia hallii (Packard 1877)		CNC497246	Canada	Nunavut	Baffin Island, Clyde	70.41	-68.58	27 Jul. 1958	J.E.H. Martin		CNC
Cotesia hallii (Packard 1877)		CNC497247	Canada	Nunavut	Baffin Island, Clyde	70.41	-68.58	27 Jul. 1958	J.E.H. Martin		CNC
Cotesia hallii (Packard 1877)		CNC497248	Canada	Nunavut	Baffin Island, Clyde	70.41	-68.58	20 Jun. 1958	J.E.H. Martin		CNC
Cotesia hallii (Packard 1877)		CNC497249	Canada	Nunavut	Baffin Island, Clyde	70.41	-68.58	7 Aug. 1958	J.E.H. Martin		CNC
Cotesia hallii (Packard 1877)		CNC497250	Canada	Nunavut	Baffin Island, Clyde	70.41	-68.58	5 Jul. 1958	J.E.H. Martin		CNC
Cotesia hallii (Packard 1877)		CNC497251	Canada	Nunavut	Ellesmere Island, Alexandra Fiord	78.53	-75.55	2-10 Jul. 1982	Olga Kukal	pan trap	CNC	Pantraps H
Cotesia hallii (Packard 1877)		CNC497252	Canada	Nunavut	Ellesmere Island, Alexandra Fiord	78.53	-75.55	2-10 Jul. 1982	Olga Kukal	pan trap	CNC	Pantraps H
Cotesia hallii (Packard 1877)		CNC497253	Canada	Nunavut	Ellesmere Island, Alexandra Fiord	78.53	-75.55	2-10 Jul. 1982	Olga Kukal	pan trap	CNC	Pantraps H
Cotesia hallii (Packard 1877)		CNC497254	Canada	Nunavut	Ellesmere Island, Alexandra Fiord	78.53	-75.55	2-10 Jul. 1982	Olga Kukal	pan trap	CNC	Pantraps H
Cotesia hallii (Packard 1877)		CNC497255	Canada	Nunavut	Ellesmere Island, Alexandra Fiord	78.53	-75.55	2-10 Jul. 1982	Olga Kukal	pan trap	CNC	Pantraps H
Cotesia hallii (Packard 1877)		CNC497256	Canada	Nunavut	Ellesmere Island, Alexandra Fiord	78.53	-75.55	2-10 Jul. 1982	Olga Kukal	pan trap	CNC	Pantraps H
Cotesia hallii (Packard 1877)		CNC497257	Canada	Nunavut	Ellesmere Island, Alexandra Fiord	78.53	-75.55	2-10 Jul. 1982	Olga Kukal	pan trap	CNC	Pantraps H
Cotesia hallii (Packard 1877)		CNC497258	Canada	Nunavut	Ellesmere Island, Alexandra Fiord	78.53	-75.55	20 Jul.-3 Aug. 1982	Olga Kukal	pan trap	CNC	Pantraps B
Cotesia hallii (Packard 1877)		CNC497259	Canada	Nunavut	Baffin Island, Clyde	70.41	-68.58	22 Jul. 1958	J.E.H. Martin		CNC
Cotesia hallii (Packard 1877)		CNC497260	Canada	Nunavut	Ellesmere Island, Hazen Camp R.	81.8167	-71.3	6 Jul. 1962	R.B. Madge		CNC
Cotesia hallii (Packard 1877)		CNC497261	Canada	Nunavut	Ellesmere Island, Hazen Camp R.	81.8167	-71.3	6 Jul. 1962	R.B. Madge		CNC
Cotesia hallii (Packard 1877)		CNC497262	Canada	Nunavut	Ellesmere Island, Hazen Camp R.	81.8167	-71.3	6 Jul. 1962	R.B. Madge		CNC
Cotesia hallii (Packard 1877)		CNC497263	Canada	Nunavut	Ellesmere Island, Hazen Camp R.	81.8167	-71.3	1 Jul. 1962	R.B. Madge		CNC
Cotesia hallii (Packard 1877)		CNC497264	Canada	Nunavut	Ellesmere Island, Hazen Camp R.	81.8167	-71.3	6 Jul. 1962	R.B. Madge		CNC
Cotesia hallii (Packard 1877)		CNC497265	Canada	Nunavut	Devon Island	75	-85	7 Aug. 1971	J.K. Ryan and C.R. Hergert	emergence trap	CNC	I.P.B. Proj.
Cotesia hallii (Packard 1877)		CNC497266	Greenland		Nedre Midsomer Sö	82.15	-34.15	13 Jul. 1966	Can. Peary Land Expd.		CNC
Cotesia hallii (Packard 1877)		CNC497267	Canada	Nunavut	Ellesmere Island, Hazen Camp	81.8167	-71.3	21 Aug. 1963	R.E. Leech		CNC	TR4
Cotesia hallii (Packard 1877)		CNC497268	Canada	Nunavut	Ellesmere Island, Hazen Camp	81.8167	-71.3	11 Jul. 1963	R.E. Leech		CNC	TR41
Cotesia hallii (Packard 1877)		CNC497269	Canada	Nunavut	Ellesmere Island, Hazen Camp	81.8167	-71.3	12 Aug. 1963	R.E. Leech		CNC	TR34
Cotesia hallii (Packard 1877)		CNC497270	Canada	Nunavut	Ellesmere Island, Hazen Camp	81.8167	-71.3	8 Aug. 1963	R.E. Leech		CNC	TR32
Cotesia hallii (Packard 1877)		CNC497271	Canada	Nunavut	Ellesmere Island, Hazen Camp	81.8167	-71.3	12 Aug. 1963	R.E. Leech		CNC	TR34
Cotesia hallii (Packard 1877)		CNC497272	Canada	Nunavut	Axel Heiberg Island, Gypsum Mill	79.4167	-90.75	20 Jul. 1963	H. K. Rutz		CNC
Cotesia hallii (Packard 1877)		CNC497273	Canada	Nunavut	Ellesmere Island, Hazen Camp	81.8167	-71.3	13 Jul. 1963	B. Hocking		CNC
Cotesia hallii (Packard 1877)		CNC497274	Canada	Nunavut	Ellesmere Island, Hazen Camp	81.8167	-71.3	17 Jul. 1962	R.B. Madge		CNC
Cotesia hallii (Packard 1877)		CNC497275	Canada	Nunavut	Ellesmere Island, Hazen Camp	81.8167	-71.3	23 Jun.-12 Jul. 1963	D.R. Oliver	reared	CNC	larva coll. 23.vi.1963
Cotesia hallii (Packard 1877)		CNC497276	Canada	Nunavut	Ellesmere Island, Hazen Camp	81.8167	-71.3	1 Aug. 1962	R.B. Madge		CNC
Cotesia hallii (Packard 1877)		CNC497277	Canada	Nunavut	Ellesmere Island, Hazen Camp	81.8167	-71.3	12 Aug. 1963	W. Forrest		CNC
Cotesia hallii (Packard 1877)		CNC497278	Canada	Nunavut	Ellesmere Island, Hazen Camp	81.8167	-71.3	12 Aug. 1963	W. Forrest		CNC
Cotesia hallii (Packard 1877)		CNC497279	Canada	Nunavut	Ellesmere Island, Hazen Camp	81.8167	-71.3	12 Aug. 1963	W. Forrest		CNC
Cotesia hallii (Packard 1877)		CNC497280	Canada	Nunavut	Ellesmere Island, Hazen Camp	81.8167	-71.3	15 Aug. 1961	D.R. Oliver		CNC
Cotesia hallii (Packard 1877)		CNC497281	Canada	Nunavut	Ellesmere Island, Hazen Camp	81.8167	-71.3	22 Jul. 1961	D.R. Oliver		CNC
Cotesia hallii (Packard 1877)		CNC497282	Canada	Nunavut	Ellesmere Island, Hazen Camp R.	81.8167	-71.3	6 Jul. 1962	R.B. Madge		CNC
Cotesia hallii (Packard 1877)		CNC497283	Canada	Nunavut	Ellesmere Island, Hazen Camp R.	81.8167	-71.3	6 Jul. 1962			CNC
Cotesia hallii (Packard 1877)		CNC497284	Canada	Nunavut	Ellesmere Island, Hazen Camp R.	81.8167	-71.3	6 Jul. 1962	R.B. Madge		CNC
Cotesia hallii (Packard 1877)		CNC497285	Canada	Nunavut	Ellesmere Island, Hazen Camp, NE.R	81.8167	-71.2667	6 Jul. 1962	R. B. Madge		CNC
Cotesia hallii (Packard 1877)		CNC497286	Canada	Nunavut	Ellesmere Island, Hazen Camp R.	81.8167	-71.2667	29 Jun. 1962	R.B. Madge		CNC
Cotesia hallii (Packard 1877)		CNC497287	Canada	Nunavut	Ellesmere Island, Hazen Camp R.	81.8167	-71.2667	30 Jun. 1962	R.B. Madge		CNC
Cotesia hallii (Packard 1877)		CNC497288	Canada	Nunavut	Ellesmere Island, Hazen Camp R.	81.8167	-71.2667	30 Jun. 1962	R.B. Madge		CNC
Cotesia hallii (Packard 1877)		CNC497289	Canada	Nunavut	Ellesmere Island, Hazen Camp	81.8167	-71.3	21 Aug. 1963	R.E. Leech		CNC	TR33
Cotesia hallii (Packard 1877)		CNC497290	Canada	Nunavut	Ellesmere Island, Hazen Camp	81.8167	-71.3	15 Jul. 1963	R.E. Leech		CNC	TR49
Cotesia hallii (Packard 1877)		CNC497291	Canada	Nunavut	Ellesmere Island, Hazen Camp	81.8167	-71.3	21 Aug. 1963	R.E. Leech		CNC	TR5
Cotesia hallii (Packard 1877)		CNC497292	Canada	Nunavut	Ellesmere Island, Hazen Camp	81.8167	-71.3	8 Aug. 1963	R.E. Leech		CNC	TR34
Cotesia hallii (Packard 1877)		CNC497293	Canada	Nunavut	Ellesmere Island, Hazen Camp	81.8167	-71.3	21 Aug. 1963	R.E. Leech		CNC	TR5
Cotesia hallii (Packard 1877)		CNC497294	Canada	Nunavut	Ellesmere Island, Hazen Camp	81.8167	-71.3	21 Aug. 1963	R.E. Leech		CNC	TR5
Cotesia hallii (Packard 1877)		CNC497295	Canada	Nunavut	Ellesmere Island, Hazen Camp	81.8167	-71.3	15 Jul. 1963	R.E. Leech		CNC	TR3
Cotesia hallii (Packard 1877)		CNC497296	Canada	Nunavut	Baffin Island, Iqaluit	63.45	-68.31	31 Jul. 1948	F.G. DiLabio		CNC
Cotesia hallii (Packard 1877)		CNC497298	Canada	Nunavut	Ellesmere Island, Alexandra Fiord	78.53	-75.55	11-20 Jul. 1982	Olga Kukal	pan trap	CNC	Pantraps B
Cotesia hallii (Packard 1877)		CNC497299	Canada	Nunavut	Ellesmere Island, Alexandra Fiord	78.53	-75.55	20 Jul.-3 Aug. 1982	Olga Kukal	pan trap	CNC	Pantraps H
Cotesia hallii (Packard 1877)		CNC497300	Canada	Nunavut	Ellesmere Island, Hazen Camp	81.8167	-71.3	21 Aug. 1963	R.E. Leech		CNC	TR5
Cotesia hallii (Packard 1877)		CNC497301	Canada	Nunavut	Ellesmere Island, Hazen Camp	81.8167	-71.3	19 Jul. 1963	R.E. Leech		CNC	TR20
Cotesia hallii (Packard 1877)		CNC497302	Canada	Nunavut	Ellesmere Island, Hazen Camp	81.8167	-71.3	3 Jul. 1963	R.E. Leech		CNC	TR5
Cotesia hallii (Packard 1877)		CNC497303	Canada	Nunavut	Ellesmere Island, Hazen Camp	81.8167	-71.3	27 Jul. 1963	R.E. Leech		CNC	TR31
Cotesia hallii (Packard 1877)		CNC497304	Canada	Nunavut	Ellesmere Island, Hazen Camp	81.8167	-71.3	8 Aug. 1963	R.E. Leech		CNC	TR5
Cotesia hallii (Packard 1877)		CNC497305	Canada	Nunavut	Ellesmere Island, Hazen Camp	81.8167	-71.3	12 Aug. 1963	R.E. Leech		CNC	TR45
Cotesia hallii (Packard 1877)		CNC497306	Canada	Nunavut	Ellesmere Island, Hazen Camp	81.8167	-71.3	12 Aug. 1963	R.E. Leech		CNC	TR47
Cotesia hallii (Packard 1877)		CNC497307	Canada	Nunavut	Ellesmere Island, Hazen Camp	81.8167	-71.3	16 Aug. 1963	R.E. Leech		CNC	TR72
Cotesia hallii (Packard 1877)		CNC497308	Canada	Nunavut	Ellesmere Island, Hazen Camp	81.8167	-71.3	16 Aug. 1963	R.E. Leech		CNC	TR72
Cotesia hallii (Packard 1877)		CNC497309	Canada	Nunavut	Ellesmere Island, Hazen Camp	81.8167	-71.3	15 Aug. 1963	R.E. Leech		CNC	TR4
Cotesia hallii (Packard 1877)		CNC497310	Canada	Nunavut	Ellesmere Island, Hazen Camp	81.8167	-71.3	19 Aug. 1963	R.E. Leech		CNC	TR23
Cotesia hallii (Packard 1877)		CNC497311	Canada	Nunavut	Ellesmere Island, Hazen Camp	81.8167	-71.3	12 Aug. 1963	R.E. Leech		CNC	TR32
Cotesia hallii (Packard 1877)		CNC497312	Canada	Nunavut	Ellesmere Island, Hazen Camp	81.8167	-71.3	19 Jul. 1963	R.E. Leech		CNC	TR12; TR12
Cotesia hallii (Packard 1877)		CNC497313	Canada	Nunavut	Ellesmere Island, Hazen Camp	81.8167	-71.3	21 Aug. 1963	R.E. Leech		CNC	TR2
Cotesia hallii (Packard 1877)		CNC497314	Canada	Nunavut	Ellesmere Island, Hazen Camp	81.8167	-71.3	8 Aug. 1963	R.E. Leech		CNC	TR45
Cotesia hallii (Packard 1877)		CNC497315	Canada	Nunavut	Ellesmere Island, Hazen Camp	81.8167	-71.3	29 Jul. 1963	R.E. Leech		CNC	TR2
Cotesia hallii (Packard 1877)		CNC497316	Canada	Nunavut	Ellesmere Island, Hazen Camp	81.8167	-71.3	11 Jul. 1963	R.E. Leech		CNC	TR42
Cotesia hallii (Packard 1877)		CNC497317	Canada	Nunavut	Ellesmere Island, Hazen Camp	81.8167	-71.3	21 Aug. 1963	R.E. Leech		CNC	TR3
Cotesia hallii (Packard 1877)		CNC497318	Canada	Nunavut	Ellesmere Island, Hazen Camp	81.8167	-71.3	4 Aug. 1963	R.E. Leech		CNC	TR31
Cotesia hallii (Packard 1877)		CNC497319	Canada	Nunavut	Ellesmere Island, Hazen Camp	81.8167	-71.3	17 Jul. 1961	D.R. Oliver		CNC
Cotesia hallii (Packard 1877)		CNC497320	Canada	Nunavut	Ellesmere Island, Alexandra Fiord	78.53	-75.55	2-10 Jul. 1982	Olga Kukal	pan trap	CNC
Cotesia hallii (Packard 1877)		CNC497321	Canada	Nunavut	Ellesmere Island, Alexandra Fiord	78.53	-75.55	2-10 Jul. 1982	Olga Kukal	pan trap	CNC
Cotesia hallii (Packard 1877)		CNC497322	Canada	Nunavut	Ellesmere Island, Alexandra Fiord	78.53	-75.55	2-10 Jul. 1982	Olga Kukal	pan trap	CNC
Cotesia hallii (Packard 1877)		CNC497323	Canada	Nunavut	Ellesmere Island, Alexandra Fiord	78.53	-75.55	2-10 Jul. 1982	Olga Kukal	pan trap	CNC
Cotesia hallii (Packard 1877)		CNC497324	Canada	Nunavut	Ellesmere Island, Alexandra Fiord	78.53	-75.55	2-10 Jul. 1982	Olga Kukal	pan trap	CNC
Cotesia hallii (Packard 1877)		CNC497325	Canada	Northwest Territories	Banks Island, Masik River	71.5333	-123.8	29 Jul. 1968	W.R.M. Mason		CNC	Fox den area
Cotesia hallii (Packard 1877)		CNC703748	Greenland		Thule			29 Jul. 1951	Chr. Vibe		ZMUC	Specimen not in CNC collection, information extracted from van Achterberg (2006) [The Braconidae (Hymenoptera) of Greenland. Zoologische Mededelingen Leiden. 80-1(2):13-62)].
Cotesia hallii (Packard 1877)		CNC703754	Greenland		Thule			7 Jul. 1952	Chr. Vibe		ZMUC	Specimen not in CNC collection, information extracted from van Achterberg (2006) [The Braconidae (Hymenoptera) of Greenland. Zoologische Mededelingen Leiden. 80-1(2):13-62)].
Cotesia hallii (Packard 1877)		CNC703755	Greenland		Thule			24 Jul. 1951	Chr. Vibe		ZMUC
Cotesia hallii (Packard 1877)		CNC703756	Greenland		Godhavn, Osterlien			8 Jul. 1969	J. Böcher		ZMUC	Specimen not in CNC collection, information extracted from van Achterberg (2006) [The Braconidae (Hymenoptera) of Greenland. Zoologische Mededelingen Leiden. 80-1(2):13-62)].
Cotesia hallii (Packard 1877)		CNC703757	Greenland		Godhavn, Osterlien			8 Jul. 1969	J. Böcher		ZMUC	Specimen not in CNC collection, information extracted from van Achterberg (2006) [The Braconidae (Hymenoptera) of Greenland. Zoologische Mededelingen Leiden. 80-1(2):13-62)].
Cotesia hallii (Packard 1877)		CNC703758	Greenland		Godhavn, Osterlien			8 Jul. 1969	J. Böcher		ZMUC	Specimen not in CNC collection, information extracted from van Achterberg (2006) [The Braconidae (Hymenoptera) of Greenland. Zoologische Mededelingen Leiden. 80-1(2):13-62)].
Cotesia hallii (Packard 1877)		CNC703759	Greenland		Sankodden, Ved Danneborg			23 Jul. 1947	P. Johnsen		ZMUC	Specimen not in CNC collection, information extracted from van Achterberg (2006) [The Braconidae (Hymenoptera) of Greenland. Zoologische Mededelingen Leiden. 80-1(2):13-62)].
Cotesia hallii (Packard 1877)		CNC703760	Greenland		Coloradodal, Fgl. 5			2 Aug. 1994	J. Böcher		RMNH	Specimen not in CNC collection, information extracted from van Achterberg (2006) [The Braconidae (Hymenoptera) of Greenland. Zoologische Mededelingen Leiden. 80-1(2):13-62)].
Cotesia hallii (Packard 1877)		CNC703761	Greenland		Jamesonland, Muslingeelvbugt, Fgl. 2			26 Jul. 1994	J. Böcher		ZMUC	Specimen not in CNC collection, information extracted from van Achterberg (2006) [The Braconidae (Hymenoptera) of Greenland. Zoologische Mededelingen Leiden. 80-1(2):13-62)].
Cotesia hallii (Packard 1877)		CNC703762	Greenland		Thule, Hojfjeldei, Sodalen lok. 32			26 Jul. 1951	C. Vibe		ZMUC	Specimen not in CNC collection, information extracted from van Achterberg (2006) [The Braconidae (Hymenoptera) of Greenland. Zoologische Mededelingen Leiden. 80-1(2):13-62)].
Cotesia hallii (Packard 1877)		CNC703763	Greenland		Faxe so, Ganselandet			1958	Chr. Vibe		ZMUC	Specimen not in CNC collection, information extracted from van Achterberg (2006) [The Braconidae (Hymenoptera) of Greenland. Zoologische Mededelingen Leiden. 80-1(2):13-62)].
Cotesia hallii (Packard 1877)		CNC703764	Greenland		Godhavn			28 Jun. 1969	J. Böcher		ZMUC	Specimen not in CNC collection, information extracted from van Achterberg (2006) [The Braconidae (Hymenoptera) of Greenland. Zoologische Mededelingen Leiden. 80-1(2):13-62)].
Cotesia hallii (Packard 1877)		CNC703765	Greenland		Godhavn			28 Jun. 1969	J. Böcher		ZMUC	Specimen not in CNC collection, information extracted from van Achterberg (2006) [The Braconidae (Hymenoptera) of Greenland. Zoologische Mededelingen Leiden. 80-1(2):13-62)].
Cotesia hallii (Packard 1877)		CNC703766	Greenland		Godhavn			28 Jun. 1969	J. Böcher		RMNH	Specimen not in CNC collection, information extracted from van Achterberg (2006) [The Braconidae (Hymenoptera) of Greenland. Zoologische Mededelingen Leiden. 80-1(2):13-62)].
Cotesia hallii (Packard 1877)		CNC703767	Greenland		Sarqaq, Kugssuak			5 Jul. 1949	Chr. Vibe		ZMUC	Specimen not in CNC collection, information extracted from van Achterberg (2006) [The Braconidae (Hymenoptera) of Greenland. Zoologische Mededelingen Leiden. 80-1(2):13-62)].
Cotesia hallii (Packard 1877)		CNC703769	Greenland		Heklahavn			19 Jun. 1892	Deichmann		ZMUC	Specimen not in CNC collection, information extracted from van Achterberg (2006) [The Braconidae (Hymenoptera) of Greenland. Zoologische Mededelingen Leiden. 80-1(2):13-62)].
Cotesia hallii (Packard 1877)		CNCH0476	Canada	Nunavut	Ellesmere Island, Fosheim Peninsula, Hot Weather Creek	79.9667	-84.4667	8 Jul. 1990	F. Brodo		CNC
Cotesia hallii (Packard 1877)		CNCH0477	Canada	Nunavut	Ellesmere Island, Fosheim Peninsula, Hot Weather Creek	79.9667	-84.4667	15 Jul. 1990	F. Brodo		CNC
Cotesia hallii (Packard 1877)		CNCH0478	Canada	Nunavut	Ellesmere Island, Fosheim Peninsula, Hot Weather Creek	79.9667	-84.4667	8 Jul. 1990	F. Brodo		CNC
Cotesia hallii (Packard 1877)		CNCH0577	Canada	Nunavut	Bylot Island; Camp 1, Mesic	73.245	-80.6345	1 Aug. 2008	International Polar Year Project		CNC
Cotesia hallii (Packard 1877)		CNCHYM00503	Canada	Northwest Territories	Ellesmere Island, Alexandra Fiord	78.53	-75.55	6 Jul. 1982	O. Kukal		CNC
Cotesia hallii (Packard 1877)		ZA2012-4208	Greenland		Northeast	74.5	-21	19 Jul. 2012	Tomas Roslin/ Riikka Kaartinen/ Gergely Varkonyi		MZH
Cotesia yakutatensis (Ashmead 1902)	Cotesia jft08	CNCH0395	Canada	Nunavut	Bylot Island; Camp 1, Humid	73.1572	-79.9495				CNC
Cotesia yakutatensis (Ashmead 1902)	Cotesia sp.	24478-D09	Greenland		Zackenberg	74.4667	-20.5667		M. Tiusanen & T. Roslin		MZH
Cotesia yakutatensis (Ashmead 1902)	Cotesia sp.	24492-F08	Greenland		Zackenberg	74.4667	-20.5667		M. Tiusanen & T. Roslin		MZH
Cotesia yakutatensis (Ashmead 1902)	Cotesia sp.	24492-F11	Greenland		Zackenberg	74.4667	-20.5667		M. Tiusanen & T. Roslin		MZH
Cotesia yakutatensis (Ashmead 1902)		CNC497416	Canada	Nunavut	Baffin Island, Clyde River	70.41	-68.58	25 Jul. 1958	J.E.H. Martin		CNC
Dolichogenidea sicaria (Marshall 1885)		CNC497444	Canada	Nunavut	Ellesmere Island, Hazen Camp	81.8167	-71.3	3 Aug. 1962	R.B. Madge		CNC
Dolichogenidea sicaria (Marshall 1885)		CNC497445	Canada	Nunavut	Ellesmere Island, Hazen Camp	81.8167	-71.3	20 Jul. 1962	R.B. Madge		CNC
Dolichogenidea sicaria (Marshall 1885)		CNC497446	Canada	Nunavut	Ellesmere Island, Hazen Camp	81.8167	-71.3	19 Aug. 1963	R.E. Leech		CNC
Dolichogenidea sicaria (Marshall 1885)		CNC497447	Canada	Nunavut	Ellesmere Island, Hazen Camp	81.8167	-71.3	6 Jul. 1962	R. Madge		CNC
Dolichogenidea sicaria (Marshall 1885)		CNC497572	Canada	Nunavut	Ellesmere Island	79.4833	-75.8333	8 Aug. 1980	J.R. Smith		CNC
Dolichogenidea sicaria (Marshall 1885)		MIC000284	Canada	Nunavut	Axel Heiberg Island; Axel Heiberg Island	79.25	-90.45	21 Jul. 1963	H. K. Rutz		CNC
Dolichogenidea sicaria (Marshall 1885)		MIC000289	Canada	Nunavut	Ellesmere Island, Hazen Camp	81.8167	-71.3	25 Jul. 1962	R. Madge		CNC
Dolichogenidea sicaria (Marshall 1885)		MIC000292	Canada	Nunavut	Baffin Island, Head of Clyde Inlet	70.29	-68.31	7 Aug. 1958	J. E. Martin		CNC
Dolichogenidea sicaria (Marshall 1885)		ZA2011-241	Greenland		Zackenberg Research Station	74.4667	-20.5667		T. Roslin & G. Varkonyi		MZH
Dolichogenidea Viereck 1911	Dolichogenidea sp. 1	CNC497448	Canada	Nunavut	Baffin Island, Clyde	70.41	-68.58	24 Jul. 1958	J.E.H.Martin		CNC
Dolichogenidea Viereck 1911	Dolichogenidea sp. 1	CNC497449	Canada	Nunavut	Baffin Island, Clyde	70.41	-68.58	22 Jul. 1958	J.E.H.Martin		CNC
Dolichogenidea Viereck 1911	Dolichogenidea sp. 1	CNC497450	Canada	Nunavut	Baffin Island, Clyde	70.41	-68.58	24 Jul. 1958	J.E.H.Martin		CNC
Dolichogenidea Viereck 1911	Dolichogenidea sp. 1	CNC497451	Canada	Nunavut	Baffin Island, Clyde	70.41	-68.58	27 Jul. 1958	J.E.H.Martin		CNC
Dolichogenidea Viereck 1911	Dolichogenidea sp. 1	CNC497452	Canada	Nunavut	Baffin Island, Clyde	70.41	-68.58	25 Jul. 1958	J.E.H.Martin		CNC
Dolichogenidea Viereck 1911	Dolichogenidea sp. 1	CNC497453	Canada	Nunavut	Baffin Island, Clyde	70.41	-68.58	24 Jul. 1958	J.E.H.Martin		CNC
Dolichogenidea Viereck 1911	Dolichogenidea sp. 1	CNC497454	Canada	Nunavut	Baffin Island, Clyde	70.41	-68.58	23 Jul. 1958	J.E.H.Martin		CNC
Dolichogenidea Viereck 1911	Dolichogenidea sp. 1	CNC497455	Canada	Nunavut	Baffin Island, Clyde	70.41	-68.58	27 Jul. 1958	J.E.H.Martin		CNC
Dolichogenidea Viereck 1911	Dolichogenidea sp. 1	CNC497456	Canada	Nunavut	Baffin Island, Clyde	70.41	-68.58	25 Jul. 1958	J.E.H.Martin		CNC
Dolichogenidea Viereck 1911	Dolichogenidea sp. 1	CNC497457	Canada	Nunavut	Baffin Island, Clyde	70.41	-68.58	25 Jul. 1958	J.E.H.Martin		CNC
Dolichogenidea Viereck 1911	Dolichogenidea sp. 1	CNC497458	Canada	Nunavut	Baffin Island, Clyde	70.41	-68.58	13 Aug. 1958	J.E.H.Martin		CNC
Dolichogenidea Viereck 1911	Dolichogenidea sp. 1	CNC497459	Canada	Nunavut	Baffin Island, Clyde	70.41	-68.58	21 Aug. 1958	G.E. Shewell		CNC
Dolichogenidea Viereck 1911	Dolichogenidea sp. 1	CNC497460	Canada	Nunavut	Baffin Island, Clyde	70.41	-68.58	27 Jul. 1958	J.E.H.Martin		CNC
Dolichogenidea Viereck 1911	Dolichogenidea sp. 1	CNC497461	Canada	Nunavut	Baffin Island, Clyde	70.41	-68.58	22 Jul. 1958	J.E.H.Martin		CNC
Dolichogenidea Viereck 1911	Dolichogenidea sp. 1	CNC497462	Canada	Nunavut	Baffin Island, Clyde	70.41	-68.58	25 Jul. 1958	J.E.H.Martin		CNC
Dolichogenidea Viereck 1911	Dolichogenidea sp. 1	CNC497463	Canada	Nunavut	Baffin Island, Clyde	70.41	-68.58	27 Jul. 1958	J.E.H.Martin		CNC
Dolichogenidea Viereck 1911	Dolichogenidea sp. 1	CNC497464	Canada	Nunavut	Baffin Island, Clyde	70.41	-68.58	4 Aug. 1958	J.E.H.Martin		CNC
Dolichogenidea Viereck 1911	Dolichogenidea sp. 1	CNC497465	Canada	Nunavut	Baffin Island, Clyde	70.41	-68.58	23 Jul. 1958	J.E.H.Martin		CNC
Dolichogenidea Viereck 1911	Dolichogenidea sp. 1	CNC497466	Canada	Nunavut	Baffin Island, Clyde	70.41	-68.58	24 Jul. 1958	J.E.H.Martin		CNC
Dolichogenidea Viereck 1911	Dolichogenidea sp. 1	CNC497467	Canada	Nunavut	Baffin Island, Clyde	70.41	-68.58	23 Jul. 1958	G.E. Shewell		CNC
Dolichogenidea Viereck 1911	Dolichogenidea sp. 1	CNC497468	Canada	Nunavut	Baffin Island, Head of Clyde Inlet	70.29	-68.31	7 Aug. 1958	J.E.H.Martin		CNC
Dolichogenidea Viereck 1911	Dolichogenidea sp. 1	CNC497469	Canada	Nunavut	Baffin Island, Clyde	70.41	-68.58	24 Jul. 1958	J.E.H.Martin		CNC
Dolichogenidea Viereck 1911	Dolichogenidea sp. 1	CNC497470	Canada	Northwest Territories	Banks Island, Masik River	71.5333	-123.8	24 Jul. 1968	W. R. M. Mason		CNC
Dolichogenidea Viereck 1911	Dolichogenidea sp. 1	CNC497471	Canada	Northwest Territories	Banks Island, Masik River	71.5333	-123.8	30 Jul. 1968	W. R. M. Mason		CNC
Dolichogenidea Viereck 1911	Dolichogenidea sp. 1	CNC497472	Canada	Northwest Territories	Banks Island, Masik River	71.5333	-123.8	29 Jul. 1968	W. R. M. Mason		CNC
Dolichogenidea Viereck 1911	Dolichogenidea sp. 1	CNC497473	Canada	Northwest Territories	Banks Island, Masik River	71.5333	-123.8	31 Jul. 1968	W. R. M. Mason		CNC
Dolichogenidea Viereck 1911	Dolichogenidea sp. 1	CNC497474	Canada	Nunavut	Baffin Island, Clyde	70.41	-68.58	27 Jul. 1958	J.E.H.Martin		CNC
Dolichogenidea Viereck 1911	Dolichogenidea sp. 1	CNC497475	Canada	Nunavut	Baffin Island, Clyde	70.41	-68.58	24 Jul. 1958	J.E.H.Martin		CNC
Dolichogenidea Viereck 1911	Dolichogenidea sp. 1	CNC497476	Canada	Nunavut	Baffin Island, Clyde	70.41	-68.58	25 Jul. 1958	J.E.H.Martin		CNC
Dolichogenidea Viereck 1911	Dolichogenidea sp. 1	CNC497477	Canada	Nunavut	Baffin Island, Clyde	70.41	-68.58	3 Aug. 1958	J.E.H.Martin		CNC
Dolichogenidea Viereck 1911	Dolichogenidea sp. 1	CNC497478	Canada	Nunavut	Baffin Island, Clyde	70.41	-68.58	23 Jul. 1958	J.E.H.Martin		CNC
Dolichogenidea Viereck 1911	Dolichogenidea sp. 1	CNC497479	Canada	Nunavut	Baffin Island, Head of Clyde Inlet	70.29	-68.31	7 Aug. 1958	G.E. Shewell		CNC
Dolichogenidea Viereck 1911	Dolichogenidea sp. 1	CNC497480	Canada	Nunavut	Baffin Island, Head of Clyde Inlet	70.29	-68.31	7 Aug. 1958	J.E.H.Martin		CNC
Dolichogenidea Viereck 1911	Dolichogenidea sp. 1	CNC497481	Canada	Northwest Territories	Banks Island, Masik River	71.5333	-123.8	28 Jul. 1968	W. R. M. Mason		CNC
Dolichogenidea Viereck 1911	Dolichogenidea sp. 1	CNC497482	Canada	Nunavut	Baffin Island, Clyde	70.41	-68.58	25 Jul. 1958	J.E.H.Martin		CNC
Dolichogenidea Viereck 1911	Dolichogenidea sp. 1	CNC497483	Canada	Nunavut	Baffin Island, Clyde	70.41	-68.58	24 Jul. 1958	J.E.H.Martin		CNC
Dolichogenidea Viereck 1911	Dolichogenidea sp. 1	CNC497484	Canada	Nunavut	Baffin Island, Clyde	70.41	-68.58	24 Jul. 1958	J.E.H.Martin		CNC
Dolichogenidea Viereck 1911	Dolichogenidea sp. 1	CNC497485	Canada	Nunavut	Baffin Island, Clyde	70.41	-68.58	27 Jul. 1958	G.E. Shewell		CNC
Dolichogenidea Viereck 1911	Dolichogenidea sp. 1	CNC497486	Canada	Nunavut	Baffin Island, Clyde	70.41	-68.58	4 Jul. 1958	J.E.H.Martin		CNC
Dolichogenidea Viereck 1911	Dolichogenidea sp. 1	CNC497487	Canada	Nunavut	Baffin Island, Clyde	70.41	-68.58	13 Aug. 1958	J.E.H.Martin		CNC
Dolichogenidea Viereck 1911	Dolichogenidea sp. 1	CNC497488	Canada	Nunavut	Baffin Island, Clyde	70.41	-68.58	24 Jul. 1958	J.E.H.Martin		CNC
Dolichogenidea Viereck 1911	Dolichogenidea sp. 1	CNC497489	Canada	Nunavut	Baffin Island, Clyde	70.41	-68.58	24 Jul. 1958	J.E.H.Martin		CNC
Dolichogenidea Viereck 1911	Dolichogenidea sp. 1	CNC497490	Canada	Nunavut	Baffin Island, Clyde	70.41	-68.58	4 Aug. 1958	J.E.H.Martin		CNC
Dolichogenidea Viereck 1911	Dolichogenidea sp. 1	CNC497491	Canada	Nunavut	Baffin Island, Clyde	70.41	-68.58	25 Jul. 1958	J.E.H.Martin		CNC
Dolichogenidea Viereck 1911	Dolichogenidea sp. 1	CNC497492	Canada	Nunavut	Baffin Island, Clyde	70.41	-68.58	27 Jul. 1958	J.E.H.Martin		CNC
Dolichogenidea Viereck 1911	Dolichogenidea sp. 1	CNC497493	Canada	Nunavut	Baffin Island, Clyde	70.41	-68.58	4 Aug. 1958	J.E.H.Martin		CNC
Dolichogenidea Viereck 1911	Dolichogenidea sp. 1	CNC497494	Canada	Nunavut	Baffin Island, Clyde	70.41	-68.58	24 Jul. 1958	J.E.H.Martin		CNC
Dolichogenidea Viereck 1911	Dolichogenidea sp. 1	CNC497495	Canada	Nunavut	Baffin Island, Clyde	70.41	-68.58	3 Aug. 1958	J.E.H.Martin		CNC
Dolichogenidea Viereck 1911	Dolichogenidea sp. 1	CNC497496	Canada	Nunavut	Baffin Island, Head of Clyde Inlet	70.29	-68.31	7 Aug. 1958	J.E.H.Martin		CNC
Dolichogenidea Viereck 1911	Dolichogenidea sp. 1	CNC497497	Canada	Nunavut	Baffin Island, Clyde	70.41	-68.58	13 Aug. 1958	J.E.H.Martin		CNC
Dolichogenidea Viereck 1911	Dolichogenidea sp. 1	CNC497498	Canada	Nunavut	Baffin Island, Clyde	70.41	-68.58	23 Jul. 1958	J.E.H.Martin		CNC
Dolichogenidea Viereck 1911	Dolichogenidea sp. 1	CNC497499	Canada	Nunavut	Baffin Island, Clyde	70.41	-68.58	22 Jul. 1958	J.E.H.Martin		CNC
Dolichogenidea Viereck 1911	Dolichogenidea sp. 1	CNC497500	Canada	Nunavut	Baffin Island, Clyde	70.41	-68.58	25 Jul. 1958	J.E.H.Martin		CNC
Dolichogenidea Viereck 1911	Dolichogenidea sp. 1	CNC497501	Canada	Nunavut	Baffin Island, Clyde	70.41	-68.58	25 Jul. 1958	J.E.H.Martin		CNC
Dolichogenidea Viereck 1911	Dolichogenidea sp. 1	CNC497502	Canada	Nunavut	Baffin Island, Clyde	70.41	-68.58	4 Aug. 1958	J.E.H.Martin		CNC
Dolichogenidea Viereck 1911	Dolichogenidea sp. 1	CNC497503	Canada	Nunavut	Baffin Island, Clyde	70.41	-68.58	4 Aug. 1958	J.E.H.Martin		CNC
Dolichogenidea Viereck 1911	Dolichogenidea sp. 1	CNC497504	Canada	Nunavut	Baffin Island, Clyde	70.41	-68.58	3 Aug. 1958	J.E.H.Martin		CNC
Dolichogenidea Viereck 1911	Dolichogenidea sp. 1	CNC497505	Canada	Nunavut	Baffin Island, Clyde	70.41	-68.58	10 Jul. 1958	G.E. Shewell		CNC
Dolichogenidea Viereck 1911	Dolichogenidea sp. 1	CNC497506	Canada	Nunavut	Baffin Island, Clyde	70.41	-68.58	10 Jul. 1958	G.E. Shewell		CNC
Dolichogenidea Viereck 1911	Dolichogenidea sp. 1	CNC497507	Canada	Nunavut	Baffin Island, Clyde	70.41	-68.58	24 Jul. 1958	J.E.H.Martin		CNC
Dolichogenidea Viereck 1911	Dolichogenidea sp. 1	CNC497508	Canada	Nunavut	Baffin Island, Clyde	70.41	-68.58	25 Jul. 1958	J.E.H.Martin		CNC
Dolichogenidea Viereck 1911	Dolichogenidea sp. 1	CNC497509	Canada	Nunavut	Baffin Island, Clyde	70.41	-68.58	27 Jul. 1958	J.E.H.Martin		CNC
Dolichogenidea Viereck 1911	Dolichogenidea sp. 1	CNC497510	Canada	Nunavut	Baffin Island, Clyde	70.41	-68.58	27 Jul. 1958	J.E.H.Martin		CNC
Dolichogenidea Viereck 1911	Dolichogenidea sp. 1	CNC497511	Canada	Nunavut	Baffin Island, Clyde	70.41	-68.58	4 Aug. 1958	J.E.H.Martin		CNC
Dolichogenidea Viereck 1911	Dolichogenidea sp. 1	CNC497512	Canada	Nunavut	Baffin Island, Clyde	70.41	-68.58	24 Jul. 1958	J.E.H.Martin		CNC
Dolichogenidea Viereck 1911	Dolichogenidea sp. 1	CNC497513	Canada	Nunavut	Baffin Island, Clyde	70.41	-68.58	2 Aug. 1958	J.E.H.Martin		CNC
Dolichogenidea Viereck 1911	Dolichogenidea sp. 1	CNC497514	Canada	Nunavut	Baffin Island, Clyde	70.41	-68.58	23 Jul. 1958	J.E.H.Martin		CNC
Dolichogenidea Viereck 1911	Dolichogenidea sp. 1	CNC497515	Canada	Nunavut	Baffin Island, Clyde	70.41	-68.58	24 Jul. 1958	J.E.H.Martin		CNC
Dolichogenidea Viereck 1911	Dolichogenidea sp. 1	CNC497516	Canada	Nunavut	Baffin Island, Clyde	70.41	-68.58	24 Jul. 1958	J.E.H.Martin		CNC
Dolichogenidea Viereck 1911	Dolichogenidea sp. 1	CNC497517	Canada	Nunavut	Baffin Island, Clyde	70.41	-68.58	2 Aug. 1958	G.E. Shewell		CNC
Dolichogenidea Viereck 1911	Dolichogenidea sp. 1	CNC497518	Canada	Nunavut	Baffin Island, Clyde	70.41	-68.58	27 Jul. 1958	J.E.H.Martin		CNC
Dolichogenidea Viereck 1911	Dolichogenidea sp. 1	CNC497519	Canada	Nunavut	Baffin Island, Head of Clyde Inlet	70.29	-68.31	7 Aug. 1958	G.E. Shewell		CNC
Dolichogenidea Viereck 1911	Dolichogenidea sp. 1	CNC497520	Canada	Nunavut	Baffin Island, Clyde	70.41	-68.58	22 Jul. 1958	J.E.H.Martin		CNC
Dolichogenidea Viereck 1911	Dolichogenidea sp. 1	CNC497521	Canada	Nunavut	Baffin Island, Clyde	70.41	-68.58	23 Jul. 1958	J.E.H.Martin		CNC
Dolichogenidea Viereck 1911	Dolichogenidea sp. 1	CNC497522	Canada	Nunavut	Baffin Island, Clyde	70.41	-68.58	24 Jul. 1958	J.E.H.Martin		CNC
Dolichogenidea Viereck 1911	Dolichogenidea sp. 1	CNC497523	Canada	Nunavut	Baffin Island, Clyde	70.41	-68.58	24 Jul. 1958	J.E.H.Martin		CNC
Dolichogenidea Viereck 1911	Dolichogenidea sp. 1	CNC497524	Canada	Nunavut	Baffin Island, Iqaluit	63.45	-68.31	3 Aug. 1948	F. G. DiLabio		CNC
Dolichogenidea Viereck 1911	Dolichogenidea sp. 1	CNC497525	Canada	Northwest Territories	Banks Island, Masik River	71.5333	-123.8	4 Jul. 1968	W. R. M. Mason		CNC
Dolichogenidea Viereck 1911	Dolichogenidea sp. 1	CNC497526	Canada	Northwest Territories	Banks Island, Masik River	71.5333	-123.8	29 Jul. 1968	W. R. M. Mason		CNC
Dolichogenidea Viereck 1911	Dolichogenidea sp. 1	CNC497527	Canada	Northwest Territories	Banks Island, Masik River	71.5333	-123.8	29 Jul. 1968	W. R. M. Mason		CNC
Dolichogenidea Viereck 1911	Dolichogenidea sp. 1	CNC497528	Canada	Northwest Territories	Banks Island, Masik River	71.5333	-123.8	30 Jul. 1968	W. R. M. Mason		CNC
Dolichogenidea Viereck 1911	Dolichogenidea sp. 1	CNC497529	Canada	Northwest Territories	Banks Island, Masik River	71.5333	-123.8	27 Jul. 1968	W. R. M. Mason		CNC
Dolichogenidea Viereck 1911	Dolichogenidea sp. 1	CNC497530	Canada	Northwest Territories	Banks Island, Masik River	71.5333	-123.8	26 Jul. 1968	W. R. M. Mason		CNC
Dolichogenidea Viereck 1911	Dolichogenidea sp. 1	CNC497531	Canada	Nunavut	Baffin Island, Kimmirut	62.84	-69.86	9 Aug. 1935	W.J.Brown		CNC
Dolichogenidea Viereck 1911	Dolichogenidea sp. 1	CNC497532	Canada	Northwest Territories	Banks Island, Masik River	71.5333	-123.8	29 Jul. 1968	W. R. M. Mason		CNC
Dolichogenidea Viereck 1911	Dolichogenidea sp. 1	CNC497533	Canada	Northwest Territories	Banks Island, Masik River	71.5333	-123.8	7 Jul. 1968	W. R. M. Mason		CNC
Dolichogenidea Viereck 1911	Dolichogenidea sp. 1	CNC497534	Canada	Nunavut	Baffin Island, Clyde	70.41	-68.58	27 Jul. 1958	J.E.H.Martin		CNC
Dolichogenidea Viereck 1911	Dolichogenidea sp. 1	CNC497535	Canada	Nunavut	Baffin Island, Clyde	70.41	-68.58	4 Aug. 1958	J.E.H.Martin		CNC
Dolichogenidea Viereck 1911	Dolichogenidea sp. 1	CNC497536	Canada	Nunavut	Baffin Island, Clyde	70.41	-68.58	22 Jul. 1958	J.E.H.Martin		CNC
Dolichogenidea Viereck 1911	Dolichogenidea sp. 1	CNC497537	Canada	Nunavut	Baffin Island, Clyde	70.41	-68.58	23 Jul. 1958	J.E.H.Martin		CNC
Dolichogenidea Viereck 1911	Dolichogenidea sp. 1	CNC497538	Canada	Nunavut	Baffin Island, Iqaluit	63.45	-68.31	10-11 Aug. 1959	W. R. M. Mason		CNC
Dolichogenidea Viereck 1911	Dolichogenidea sp. 1	CNC497539	Canada	Nunavut	Baffin Island, Clyde	70.41	-68.58	4 Aug. 1958	J.E.H.Martin		CNC
Dolichogenidea Viereck 1911	Dolichogenidea sp. 1	CNC497540	Canada	Nunavut	Baffin Island, Clyde	70.41	-68.58	1 Aug. 1958	J.E.H.Martin		CNC
Dolichogenidea Viereck 1911	Dolichogenidea sp. 1	CNC497541	Canada	Nunavut	Baffin Island, Clyde	70.41	-68.58	24 Jul. 1958	J.E.H.Martin		CNC
Dolichogenidea Viereck 1911	Dolichogenidea sp. 1	CNC497542	Canada	Northwest Territories	Banks Island, Masik River	71.5333	-123.8	28 Jul. 1968	W. R. M. Mason		CNC
Dolichogenidea Viereck 1911	Dolichogenidea sp. 1	CNC497543	Canada	Northwest Territories	Banks Island, Masik River	71.5333	-123.8	27 Jul. 1968	J.E.H.Martin		CNC
Dolichogenidea Viereck 1911	Dolichogenidea sp. 1	CNC497544	Canada	Nunavut	Baffin Island, Clyde	70.41	-68.58	27 Jul. 1958	G.E. Shewell		CNC
Dolichogenidea Viereck 1911	Dolichogenidea sp. 1	CNC497545	Canada	Nunavut	Baffin Island, Clyde	70.41	-68.58	27 Jul. 1958	G.E. Shewell		CNC
Dolichogenidea Viereck 1911	Dolichogenidea sp. 1	CNC497546	Canada	Nunavut	Baffin Island, Clyde	70.41	-68.58	13 Aug. 1958	J.E.H.Martin		CNC
Dolichogenidea Viereck 1911	Dolichogenidea sp. 1	CNC497547	Canada	Nunavut	Baffin Island, Clyde	70.41	-68.58	23 Jul. 1958	J.E.H.Martin		CNC
Dolichogenidea Viereck 1911	Dolichogenidea sp. 1	CNC497548	Canada	Nunavut	Baffin Island, Clyde	70.41	-68.58	4 Aug. 1958	J.E.H.Martin		CNC
Dolichogenidea Viereck 1911	Dolichogenidea sp. 1	GOU0516	Canada	Northwest Territories	Banks Island, Sachs Harbour	71.9865	-125.243	22 Jul. 2010	Goulet & Boudreault		CNC
Dolichogenidea Viereck 1911	Dolichogenidea sp. 1	GOU0518	Canada	Northwest Territories	Banks Island, Sachs Harbour	71.9865	-125.243	22 Jul. 2010	Goulet & Boudreault		CNC
Dolichogenidea Viereck 1911	Dolichogenidea sp. 1	GOU0523	Canada	Northwest Territories	Banks Island, Sachs Harbour	71.9865	-125.243	22 Jul. 2010	Goulet & Boudreault		CNC
Dolichogenidea Viereck 1911	Dolichogenidea sp. 1	MIC000286	Canada	Nunavut	Baffin Island, Iqaluit	63.45	-68.31	31 Jul. 1948	F. DiLabio		CNC
Dolichogenidea Viereck 1911	Dolichogenidea sp. 2; Dolichogenidea jft11	CNC497549	Canada	Northwest Territories	Banks Island, Masik River	71.5333	-123.8	30 Jul. 1968	W. Mason		CNC
Dolichogenidea Viereck 1911	Dolichogenidea sp. 2; Dolichogenidea jft11	CNC497550	Canada	Northwest Territories	Banks Island, Masik River	71.5333	-123.8	28 Jul. 1968	W. Mason		CNC
Dolichogenidea Viereck 1911	Dolichogenidea sp. 2; Dolichogenidea jft11	CNC497551	Canada	Northwest Territories	Banks Island, Masik River	71.5333	-123.8	29 Jul. 1968	W. Mason		CNC
Dolichogenidea Viereck 1911	Dolichogenidea sp. 2; Dolichogenidea jft11	CNC497552	Canada	Northwest Territories	Banks Island, Masik River	71.5333	-123.8	28 Jul. 1968	W. Mason		CNC
Dolichogenidea Viereck 1911	Dolichogenidea sp. 2; Dolichogenidea jft11	CNC497553	Canada	Northwest Territories	Banks Island, Masik River	71.5333	-123.8	29 Jul. 1968	W. Mason		CNC
Dolichogenidea Viereck 1911	Dolichogenidea sp. 2; Dolichogenidea jft11	CNC497554	Canada	Northwest Territories	Banks Island, Masik River	71.5333	-123.8	29 Jul. 1968	W. Mason		CNC
Dolichogenidea Viereck 1911	Dolichogenidea sp. 2; Dolichogenidea jft11	CNC497555	Canada	Northwest Territories	Banks Island, Masik River	71.5333	-123.8	27 Jul. 1968	W. Mason		CNC
Dolichogenidea Viereck 1911	Dolichogenidea sp. 2; Dolichogenidea jft11	CNC497556	Canada	Northwest Territories	Banks Island, Masik River	71.5333	-123.8	29 Jul. 1968	W. Mason		CNC
Dolichogenidea Viereck 1911	Dolichogenidea sp. 2; Dolichogenidea jft11	CNC497557	Canada	Northwest Territories	Banks Island, Masik River	71.5333	-123.8	31 Jul. 1968	W. Mason		CNC
Dolichogenidea Viereck 1911	Dolichogenidea sp. 2; Dolichogenidea jft11	CNC497558	Canada	Northwest Territories	Banks Island, Masik River	71.5333	-123.8	20 Jul. 1960	W. Mason		CNC
Dolichogenidea Viereck 1911	Dolichogenidea sp. 2; Dolichogenidea jft11	CNC497559	Canada	Northwest Territories	Banks Island, Masik River	71.5333	-123.8		W. Mason		CNC
Dolichogenidea Viereck 1911	Dolichogenidea sp. 2; Dolichogenidea jft11	CNC497560	Canada	Northwest Territories	Banks Island, Masik River	71.5333	-123.8		W. Mason		CNC
Dolichogenidea Viereck 1911	Dolichogenidea sp. 2; Dolichogenidea jft11	CNC497561	Canada	Northwest Territories	Banks Island, Masik River	71.5333	-123.8		W. Mason		CNC
Dolichogenidea Viereck 1911	Dolichogenidea sp. 2; Dolichogenidea jft11	CNC497562	Canada	Northwest Territories	Banks Island, Masik River	71.5333	-123.8		W. Mason		CNC
Dolichogenidea Viereck 1911	Dolichogenidea sp. 2; Dolichogenidea jft11	CNC497563	Canada	Northwest Territories	Banks Island, Masik River	71.5333	-123.8		W. Mason		CNC
Dolichogenidea Viereck 1911	Dolichogenidea sp. 2; Dolichogenidea jft11	CNC497564	Canada	Northwest Territories	Banks Island, Masik River	71.5333	-123.8		W. Mason		CNC
Dolichogenidea Viereck 1911	Dolichogenidea sp. 2; Dolichogenidea jft11	CNC497565	Canada	Northwest Territories	Banks Island, Masik River	71.5333	-123.8		W. Mason		CNC
Dolichogenidea Viereck 1911	Dolichogenidea sp. 2; Dolichogenidea jft11	CNC497566	Canada	Northwest Territories	Banks Island, Masik River	71.5333	-123.8		W. Mason		CNC
Dolichogenidea Viereck 1911	Dolichogenidea sp. 2; Dolichogenidea jft11	CNC497567	Canada	Northwest Territories	Banks Island, Masik River	71.5333	-123.8		W. Mason		CNC
Dolichogenidea Viereck 1911	Dolichogenidea sp. 2; Dolichogenidea jft11	CNC497568	Canada	Northwest Territories	Banks Island, Masik River	71.5333	-123.8		W. Mason		CNC
Dolichogenidea Viereck 1911	Dolichogenidea sp. 2; Dolichogenidea jft11	MIC000290	Canada	Northwest Territories	Banks Island, Masik River	71.5333	-123.8	29 Jul. 1968	W. Mason		CNC
Dolichogenidea Viereck 1911	Dolichogenidea sp. 3	CNC497569	Canada	Northwest Territories	Victoria Island	71.2833	-114	23-28 Jul. 1975	G. & M. Wood	Malaise trap	CNC
Dolichogenidea Viereck 1911	Dolichogenidea sp. 3	CNC497570	Canada	Northwest Territories	Victoria Island	71.2833	-114	23-28 Jul. 1975	G. & M. Wood	Malaise trap	CNC
Dolichogenidea Viereck 1911	Dolichogenidea sp. 3	CNC497571	Canada	Northwest Territories	Victoria Island	71.2833	-114	23-28 Jul. 1975	G. & M. Wood	Malaise trap	CNC
Glyptapanteles Ashmead 1904	Glyptapanteles jft05	MIC000306	Canada	Northwest Territories	Banks Island, Masik River	71.5333	-123.8	30 Jul. 1968	W. Mason		CNC
Glyptapanteles Ashmead 1904	Glyptapanteles jft07	MIC000333	Canada	Nunavut	Victoria Island, Cambridge Bay	69.07	-105.03	3 Aug. 1950	E. Smith		CNC
Glyptapanteles Ashmead 1904	Glyptapanteles sp. 1 High Arctic	CNC620636	Canada	Northwest Territories	Banks Island, Masik River	71.5333	-123.8	28 Jul. 1968	W. R. M. Mason		CNC
Glyptapanteles Ashmead 1904	Glyptapanteles sp. 1 High Arctic	CNC620637	Canada	Northwest Territories	Banks Island, Masik River	71.5333	-123.8	29 Jul. 1968	W. R. M. Mason		CNC	Fox den area
Glyptapanteles Ashmead 1904	Glyptapanteles sp. 1 High Arctic	CNC620638	Canada	Northwest Territories	Banks Island, Masik River	71.5333	-123.8	30 Jul. 1968	W. R. M. Mason		CNC	Fox den area
Glyptapanteles Ashmead 1904	Glyptapanteles sp. 1 High Arctic	CNC620639	Canada	Northwest Territories	Banks Island, Masik River	71.5333	-123.8	30 Jul. 1968	W. R. M. Mason		CNC	Fox den area
Glyptapanteles Ashmead 1904	Glyptapanteles sp. 1 High Arctic	CNC620640	Canada	Northwest Territories	Banks Island, Masik River	71.5333	-123.8	29 Jul. 1968	W. R. M. Mason		CNC	Fox den area
Glyptapanteles Ashmead 1904	Glyptapanteles sp. 1 High Arctic	CNC620641	Canada	Northwest Territories	Banks Island, Masik River	71.5333	-123.8	29 Jul. 1968	W. R. M. Mason		CNC	Fox den area
Glyptapanteles Ashmead 1904	Glyptapanteles sp. 1 High Arctic	CNC620642	Canada	Northwest Territories	Banks Island, Masik River	71.5333	-123.8	30 Jul. 1968	W. R. M. Mason		CNC	Fox den area
Glyptapanteles Ashmead 1904	Glyptapanteles sp. 1 High Arctic	CNC620643	Canada	Northwest Territories	Banks Island, Masik River	71.5333	-123.8	30 Jul. 1968	W. R. M. Mason		CNC	Fox den area
Glyptapanteles Ashmead 1904	Glyptapanteles sp. 1 High Arctic	CNC620644	Canada	Northwest Territories	Banks Island, Masik River	71.5333	-123.8	30 Jul. 1968	W. R. M. Mason		CNC	Fox den area
Glyptapanteles Ashmead 1904	Glyptapanteles sp. 1 High Arctic	CNC620645	Canada	Northwest Territories	Banks Island, Masik River	71.5333	-123.8	30 Jul. 1968	W. R. M. Mason		CNC	Fox den area
Glyptapanteles Ashmead 1904	Glyptapanteles sp. 1 High Arctic	CNC620646	Canada	Northwest Territories	Banks Island, Masik River	71.5333	-123.8	30 Jul. 1968	W. R. M. Mason		CNC	Fox den area
Glyptapanteles Ashmead 1904	Glyptapanteles sp. 1 High Arctic	CNC620647	Canada	Northwest Territories	Banks Island, Masik River	71.5333	-123.8	29 Jul. 1968	W. R. M. Mason		CNC	Fox den area
Glyptapanteles Ashmead 1904	Glyptapanteles sp. 1 High Arctic	CNC620648	Canada	Northwest Territories	Banks Island, Masik River	71.5333	-123.8	29 Jul. 1968	W. R. M. Mason		CNC	Fox den area
Glyptapanteles Ashmead 1904	Glyptapanteles sp. 1 High Arctic	CNC620649	Canada	Northwest Territories	Banks Island, Masik River	71.5333	-123.8	29 Jul. 1968	W. R. M. Mason		CNC	Fox den area
Glyptapanteles Ashmead 1904	Glyptapanteles sp. 1 High Arctic	CNC620650	Canada	Northwest Territories	Banks Island, Masik River	71.5333	-123.8	29 Jul. 1968	W. R. M. Mason		CNC	Fox den area
Glyptapanteles Ashmead 1904	Glyptapanteles sp. 1 High Arctic	CNC620651	Canada	Northwest Territories	Banks Island, Masik River	71.5333	-123.8	29 Jul. 1968	W. R. M. Mason		CNC	Fox den area
Glyptapanteles Ashmead 1904	Glyptapanteles sp. 1 High Arctic	CNC620652	Canada	Northwest Territories	Banks Island, Masik River	71.5333	-123.8	29 Jul. 1968	W. R. M. Mason		CNC	Fox den area
Glyptapanteles Ashmead 1904	Glyptapanteles sp. 1 High Arctic	CNC620653	Canada	Northwest Territories	Banks Island, Masik River	71.5333	-123.8	29 Jul. 1968	W. R. M. Mason		CNC	Fox den area
Glyptapanteles Ashmead 1904	Glyptapanteles sp. 1 High Arctic	CNC620654	Canada	Northwest Territories	Banks Island, Masik River	71.5333	-123.8	29 Jul. 1968	W. R. M. Mason		CNC	Fox den area
Glyptapanteles Ashmead 1904	Glyptapanteles sp. 1 High Arctic	CNC620655	Canada	Northwest Territories	Banks Island, Masik River	71.5333	-123.8	28 Jul. 1968	W. R. M. Mason		CNC
Glyptapanteles Ashmead 1904	Glyptapanteles sp. 1 High Arctic	CNC620656	Canada	Northwest Territories	Banks Island, Masik River	71.5333	-123.8	28 Jul. 1968	W. R. M. Mason		CNC
Glyptapanteles Ashmead 1904	Glyptapanteles sp. 1 High Arctic	CNC620657	Canada	Northwest Territories	Banks Island, Masik River	71.5333	-123.8	20 Jul. 1968	W. R. M. Mason	pan trap	CNC	On owl perch; Pan trap on ground
Glyptapanteles Ashmead 1904	Glyptapanteles sp. 1 High Arctic	CNC620658	Canada	Northwest Territories	Banks Island, Masik River	71.5333	-123.8	27 Jul. 1968	W. R. M. Mason	Malaise trap	CNC	1(w)
Glyptapanteles Ashmead 1904	Glyptapanteles sp. 1 High Arctic	CNC620659	Canada	Northwest Territories	Banks Island, Masik River	71.5333	-123.8	29 Jul. 1968	W. R. M. Mason		CNC	Fox den area
Glyptapanteles Ashmead 1904	Glyptapanteles sp. 1 High Arctic	CNC620660	Canada	Northwest Territories	Banks Island, Masik River	71.5333	-123.8	26 Jul. 1968	W. R. M. Mason	pan trap	CNC	On owl perch
Glyptapanteles Ashmead 1904	Glyptapanteles sp. 1 High Arctic	CNC620661	Canada	Northwest Territories	Banks Island, Masik River	71.5333	-123.8	26 Jul. 1968	W. R. M. Mason	pan trap	CNC	On owl perch
Glyptapanteles Ashmead 1904	Glyptapanteles sp. 1 High Arctic	CNC620662	Canada	Northwest Territories	Banks Island, Masik River	71.5333	-123.8	30 Jul. 1968	W. R. M. Mason	pan trap	CNC	On owl perch
Glyptapanteles Ashmead 1904	Glyptapanteles sp. 1 High Arctic	CNC620663	Canada	Northwest Territories	Banks Island, Masik River	71.5333	-123.8	30 Jul. 1968	W. R. M. Mason	pan trap	CNC	On owl perch
Glyptapanteles Ashmead 1904	Glyptapanteles sp. 1 High Arctic	CNC620664	Canada	Northwest Territories	Banks Island, Masik River	71.5333	-123.8	30 Jul. 1968	W. R. M. Mason		CNC	Fox den area
Glyptapanteles Ashmead 1904	Glyptapanteles sp. 1 High Arctic	CNC620665	Canada	Northwest Territories	Banks Island, Masik River	71.5333	-123.8	29 Jul. 1968	W. R. M. Mason		CNC	Fox den area
Glyptapanteles Ashmead 1904	Glyptapanteles sp. 1 High Arctic	CNC620666	Canada	Northwest Territories	Banks Island, Masik River	71.5333	-123.8	29 Jul. 1968	W. R. M. Mason		CNC	Fox den area
Glyptapanteles Ashmead 1904	Glyptapanteles sp. 1 High Arctic	CNC620667	Canada	Northwest Territories	Banks Island, Masik River	71.5333	-123.8	26 Jul. 1968	W. R. M. Mason		CNC
Glyptapanteles Ashmead 1904	Glyptapanteles sp. 1 High Arctic	CNC620668	Canada	Northwest Territories	Banks Island, Masik River	71.5333	-123.8	29 Jul. 1968	W. R. M. Mason		CNC	Fox den area
Glyptapanteles Ashmead 1904	Glyptapanteles sp. 1 High Arctic	CNC620669	Canada	Northwest Territories	Banks Island, Masik River	71.5333	-123.8	28 Jul. 1968	W. R. M. Mason		CNC
Glyptapanteles Ashmead 1904	Glyptapanteles sp. 1 High Arctic	CNC620670	Canada	Northwest Territories	Banks Island, Masik River	71.5333	-123.8	28 Jul. 1968	W. R. M. Mason		CNC
Glyptapanteles Ashmead 1904	Glyptapanteles sp. 1 High Arctic	CNC620671	Canada	Northwest Territories	Banks Island, Masik River	71.5333	-123.8	28 Jul. 1968	W. R. M. Mason		CNC
Glyptapanteles Ashmead 1904	Glyptapanteles sp. 1 High Arctic	CNC620672	Canada	Northwest Territories	Banks Island, Masik River	71.5333	-123.8	30 Jul. 1968	W. R. M. Mason		CNC	Fox den area
Glyptapanteles Ashmead 1904	Glyptapanteles sp. 1 High Arctic	CNC620673	Canada	Northwest Territories	Banks Island, Masik River	71.5333	-123.8	6 Jul. 1968	W. R. M. Mason	Malaise trap	CNC
Glyptapanteles Ashmead 1904	Glyptapanteles sp. 1 High Arctic	CNC620674	Canada	Northwest Territories	Banks Island, Masik River	71.5333	-123.8	14 Jul. 1968	W. R. M. Mason	Malaise trap	CNC
Glyptapanteles Ashmead 1904	Glyptapanteles sp. 1 High Arctic	CNC620675	Canada	Northwest Territories	Banks Island, Masik River	71.5333	-123.8	29 Jul. 1968	W. R. M. Mason		CNC	Fox den area
Glyptapanteles Ashmead 1904	Glyptapanteles sp. 1 High Arctic	CNC620676	Canada	Northwest Territories	Banks Island, Masik River	71.5333	-123.8	30 Jul. 1968	W. R. M. Mason		CNC	Fox den area
Glyptapanteles Ashmead 1904	Glyptapanteles sp. 1 High Arctic	CNC620677	Canada	Northwest Territories	Banks Island, Masik River	71.5333	-123.8	28 Jul. 1968	W. R. M. Mason		CNC
Glyptapanteles Ashmead 1904	Glyptapanteles sp. 1 High Arctic	CNC620678	Canada	Northwest Territories	Banks Island, Masik River	71.5333	-123.8	31 Jul. 1968	W. R. M. Mason	Malaise trap	CNC	Malaise trap 1
Glyptapanteles Ashmead 1904	Glyptapanteles sp. 1 High Arctic	CNC620679	Canada	Northwest Territories	Banks Island, Masik River	71.5333	-123.8	29 Jul. 1968	W. R. M. Mason		CNC	Fox den area
Glyptapanteles Ashmead 1904	Glyptapanteles sp. 1 High Arctic, Glyptapanteles jft09	MIC000298	Canada	Northwest Territories	Banks Island, Masik River	71.5333	-123.8	16 Jul. 1968	W. Mason		CNC
Glyptapanteles Ashmead 1904	Glyptapanteles sp. 1 High Arctic, Glyptapanteles jft09	MIC000304	Canada	Nunavut	Baffin Island, Head of Clyde Inlet	70.29	-68.31	7 Aug. 1958	G. Shewell		CNC
Glyptapanteles Ashmead 1904	Glyptapanteles sp. 2 High Arctic	CNC620748	Canada	Nunavut	Baffin Island, Clyde	70.41	-68.58	24 Jul. 1958	J. E. H. Martin		CNC	Not sure if ”Clyde” refers to Clyde River or to a station nearby (possibly one that closed in the 70s).
Glyptapanteles Ashmead 1904	Glyptapanteles sp. 2 High Arctic	CNC620749	Canada	Nunavut	Baffin Island, Clyde	70.41	-68.58	27 Jul. 1958	J. E. H. Martin		CNC	Not sure if ”Clyde” refers to Clyde River or to a station nearby (possibly one that closed in the 70s).
Glyptapanteles Ashmead 1904	Glyptapanteles sp. 2 High Arctic	CNC620750	Canada	Nunavut	Baffin Island, Clyde	70.41	-68.58	4 Aug. 1958	J. E. H. Martin		CNC	Not sure if ”Clyde” refers to Clyde River or to a station nearby (possibly one that closed in the 70s).
Glyptapanteles Ashmead 1904	Glyptapanteles sp. 2 High Arctic	CNC620751	Canada	Nunavut	Baffin Island, Clyde	70.41	-68.58	12 Aug. 1958	J. E. H. Martin		CNC	Not sure if ”Clyde” refers to Clyde River or to a station nearby (possibly one that closed in the 70s).
Glyptapanteles Ashmead 1904	Glyptapanteles sp. 2 High Arctic	CNC620752	Canada	Nunavut	Baffin Island, Head of Clyde Inlet	70.29	-68.31	7 Aug. 1958	J. E. H. Martin		CNC
Glyptapanteles Ashmead 1904	Glyptapanteles sp. 2 High Arctic	CNC620753	Canada	Nunavut	Baffin Island, Clyde	70.41	-68.58	12 Aug. 1958	J. E. H. Martin		CNC	Not sure if ”Clyde” refers to Clyde River or to a station nearby (possibly one that closed in the 70s).
Glyptapanteles Ashmead 1904	Glyptapanteles sp. 2 High Arctic	CNC620754	Canada	Nunavut	Baffin Island, Clyde	70.41	-68.58	4 Aug. 1958	J. E. H. Martin		CNC	Not sure if ”Clyde” refers to Clyde River or to a station nearby (possibly one that closed in the 70s).
Glyptapanteles Ashmead 1904	Glyptapanteles sp. 2 High Arctic	CNC620756	Canada	Nunavut	Baffin Island, Head of Clyde Inlet	70.29	-68.31	7 Aug. 1958	J. E. H. Martin		CNC
Glyptapanteles Ashmead 1904	Glyptapanteles sp. 2 High Arctic	CNC620758	Canada	Nunavut	Baffin Island, Clyde	70.41	-68.58	4 Aug. 1958	J. E. H. Martin		CNC	Not sure if ”Clyde” refers to Clyde River or to a station nearby (possibly one that closed in the 70s).
Glyptapanteles Ashmead 1904	Glyptapanteles sp. 2 High Arctic	CNC620759	Canada	Nunavut	Baffin Island, Clyde	70.41	-68.58	24 Jul. 1958	J. E. H. Martin		CNC	Not sure if ”Clyde” refers to Clyde River or to a station nearby (possibly one that closed in the 70s).
Glyptapanteles Ashmead 1904	Glyptapanteles sp. 2 High Arctic	CNC620760	Canada	Nunavut	Baffin Island, Clyde	70.41	-68.58	24 Jul. 1958	J. E. H. Martin		CNC	Not sure if ”Clyde” refers to Clyde River or to a station nearby (possibly one that closed in the 70s).
Glyptapanteles Ashmead 1904	Glyptapanteles sp. 2 High Arctic	CNC620761	Greenland		Nedre Midsommer Sö	82.15	-34.15	3 Aug. 1966	Canadian Peary Land Expedition		CNC	Location can also be spelled ”Nedre Midsommer Sø”
Glyptapanteles Ashmead 1904	Glyptapanteles sp. 3 Banks Island Canada	BIOUG16644-D03	Canada	Northwest Territories	Aulavik National Park	73.228	-119.551	7 Jul. 2014	Parks Canada	malaise trap	BIOUG	Malaise traps 209m apart Aulavik NP
Glyptapanteles Ashmead 1904	Glyptapanteles sp. 3 Banks Island Canada	BIOUG16644-D04	Canada	Northwest Territories	Aulavik National Park	73.228	-119.551	7 Jul. 2014	Parks Canada	malaise trap	BIOUG	Malaise traps 209m apart Aulavik NP
Glyptapanteles Ashmead 1904	Glyptapanteles sp. 3 Banks Island Canada	BIOUG16644-D05	Canada	Northwest Territories	Aulavik National Park	73.228	-119.551	7 Jul. 2014	Parks Canada	malaise trap	BIOUG	Malaise traps 209m apart Aulavik NP
Glyptapanteles Ashmead 1904	Glyptapanteles sp. 3 High Arctic	CNC620757	Canada	Northwest Territories	Banks Island, Masik River	71.5333	-123.8	20 Jul. 1968	W. R. M. Mason	pan trap	CNC	Pan trap on ground
Glyptapanteles Ashmead 1904	Glyptapanteles sp. 4 High Arctic	CNC620680	Canada	Northwest Territories	Victoria Island	71.2833	-114	11-15 Jul. 1975	G. & M. Wood		CNC
Glyptapanteles Ashmead 1904	Glyptapanteles sp. 4 High Arctic	CNC620681	Canada	Northwest Territories	Victoria Island	71.2833	-114	11-15 Jul. 1975	G. & M. Wood		CNC
Glyptapanteles Ashmead 1904	Glyptapanteles sp. 4 High Arctic	CNC620682	Canada	Northwest Territories	Victoria Island	71.2833	-114	11-15 Jul. 1975	G. & M. Wood		CNC
Glyptapanteles Ashmead 1904	Glyptapanteles sp. 4 High Arctic	CNC620683	Canada	Northwest Territories	Victoria Island	71.2833	-114	11-15 Jul. 1975	G. & M. Wood		CNC
Glyptapanteles Ashmead 1904	Glyptapanteles sp. 4 High Arctic	CNC620684	Canada	Northwest Territories	Victoria Island	71.2833	-114	23-28 Jul. 1975	G. & M. Wood		CNC
Glyptapanteles Ashmead 1904	Glyptapanteles sp. 4 High Arctic	CNC620685	Canada	Northwest Territories	Victoria Island	71.2833	-114	23-28 Jul. 1975	G. & M. Wood		CNC
Glyptapanteles Ashmead 1904	Glyptapanteles sp. 4 High Arctic	CNC620686	Canada	Northwest Territories	Victoria Island	71.2833	-114	23-28 Jul. 1975	G. & M. Wood		CNC
Glyptapanteles Ashmead 1904	Glyptapanteles sp. 4 High Arctic	CNC620687	Canada	Northwest Territories	Victoria Island	71.2833	-114	23-28 Jul. 1975	G. & M. Wood		CNC
Glyptapanteles Ashmead 1904	Glyptapanteles sp. 4 High Arctic	CNC620688	Canada	Northwest Territories	Victoria Island	71.2833	-114	23-28 Jul. 1975	G. & M. Wood		CNC
Glyptapanteles Ashmead 1904	Glyptapanteles sp. 4 High Arctic	CNC620689	Canada	Northwest Territories	Victoria Island	71.2833	-114	1-5 Jul. 1975	G. & M. Wood		CNC
Glyptapanteles Ashmead 1904	Glyptapanteles sp. 4 High Arctic	CNC620690	Canada	Northwest Territories	Victoria Island	71.2833	-114	23-28 Jul. 1975	G. & M. Wood		CNC
Glyptapanteles Ashmead 1904	Glyptapanteles sp. 4 High Arctic	CNC620691	Canada	Northwest Territories	Victoria Island	71.2833	-114	23-28 Jul. 1975	G. & M. Wood	Malaise trap	CNC
Glyptapanteles Ashmead 1904	Glyptapanteles sp. 4 High Arctic	CNC620692	Canada	Northwest Territories	Victoria Island	71.2833	-114	1-5 Jul. 1975	G. & M. Wood		CNC
Glyptapanteles Ashmead 1904	Glyptapanteles sp. 4 High Arctic	CNC620693	Canada	Northwest Territories	Victoria Island	71.2833	-114	23-28 Jul. 1975	G. & M. Wood		CNC
Glyptapanteles Ashmead 1904	Glyptapanteles sp. 4 High Arctic	CNC620694	Canada	Northwest Territories	Victoria Island	71.2833	-114	23-28 Jul. 1975	G. & M. Wood		CNC
Glyptapanteles Ashmead 1904	Glyptapanteles sp. 4 High Arctic	CNC620695	Canada	Northwest Territories	Victoria Island	71.2833	-114	1-5 Jul. 1975	G. & M. Wood		CNC
Glyptapanteles Ashmead 1904	Glyptapanteles sp. 4 High Arctic	CNC620696	Canada	Northwest Territories	Victoria Island	71.2833	-114	23-28 Jul. 1975	G. & M. Wood		CNC
Glyptapanteles Ashmead 1904	Glyptapanteles sp. 4 High Arctic	CNC620697	Canada	Northwest Territories	Victoria Island	71.2833	-114	23-28 Jul. 1975	G. & M. Wood		CNC
Glyptapanteles Ashmead 1904	Glyptapanteles sp. 4 High Arctic	CNC620729	Canada	Northwest Territories	Victoria Island	71.2833	-114	11-15 Jul. 1975	G. & M. Wood		CNC
Glyptapanteles Ashmead 1904	Glyptapanteles sp. 4 High Arctic	CNC620730	Canada	Northwest Territories	Victoria Island	71.2833	-114	11-15 Jul. 1975	G. & M. Wood		CNC
Glyptapanteles Ashmead 1904	Glyptapanteles sp. 4 High Arctic	CNC620731	Canada	Northwest Territories	Victoria Island	71.2833	-114	11-15 Jul. 1975	G. & M. Wood		CNC
Glyptapanteles Ashmead 1904	Glyptapanteles sp. 4 High Arctic	CNC620732	Canada	Northwest Territories	Victoria Island	71.2833	-114	1-5 Jul. 1975	G. & M. Wood		CNC
Glyptapanteles Ashmead 1904	Glyptapanteles sp. 4 High Arctic	CNC620762	Canada	Nunavut	Baffin Island, Clyde	70.41	-68.58	3 Jul. 1958	J. E. H. Martin		CNC	Not sure if ”Clyde” refers to Clyde River or to a station nearby (possibly one that closed in the 70s).
Glyptapanteles Ashmead 1904	Glyptapanteles sp. 4 High Arctic	MIC000293	Canada	Northwest Territories	Victoria Island	71.2833	-114	3 Jul. 1975	G & M. Wood		CNC
Glyptapanteles Ashmead 1904	Glyptapanteles sp. 4 High Arctic	MIC000294	Canada	Nunavut	Baffin Island, Clyde	70.41	-68.58	3 Jul. 1958	G. Shewell		CNC
Glyptapanteles Ashmead 1904	Glyptapanteles sp. 4 High Arctic	MIC000297	Canada	Northwest Territories	Victoria Island	71.2833	-114	13 Jul. 1975	G & M. Wood		CNC
Glyptapanteles Ashmead 1904	Glyptapanteles sp. 4 High Arctic	MIC000302	Canada	Northwest Territories	Victoria Island	71.2833	-114	3 Jul. 1975	G & M. Wood		CNC
Glyptapanteles Ashmead 1904	Glyptapanteles sp. 5 High Arctic	CNC497573	Canada	Nunavut	Ellesmere Island, Alert			10 Aug. 2001	Univ. Ottawa Research Team	pitfall trap	CNC
Glyptapanteles Ashmead 1904	Glyptapanteles sp. 5 High Arctic	CNC497574	Canada	Nunavut	Ellesmere Island, Alert			10 Aug. 2001	Univ. Ottawa Research Team	pitfall trap	CNC
Glyptapanteles Ashmead 1904	Glyptapanteles sp. 5 High Arctic	CNC620728	Greenland		Nedre Midsommer Sö	82.15	-34.15	3 Aug. 1966	Canadian Peary Land Expedition		CNC	Location can also be spelled ”Nedre Midsommer Sø”
Glyptapanteles Ashmead 1904	Glyptapanteles sp. 5 High Arctic	CNC620737	Canada	Nunavut	Ellesmere Island, Alert	82.5	-62.3	19 Jun. 1951	P. F. Bruggemann		CNC	”R.E. #6” is written after the location
Glyptapanteles Ashmead 1904	Glyptapanteles sp. 5 High Arctic	CNC620738	Canada	Nunavut	Ellesmere Island, Alert	82.5	-62.3	19 Jun. 1951	P. F. Bruggemann		CNC	”R.E. #6” is written after the location
Glyptapanteles Ashmead 1904	Glyptapanteles sp. 5 High Arctic	CNC620739	Canada	Nunavut	Ellesmere Island, Alert	82.5	-62.3	19 Jun. 1951	P. F. Bruggemann		CNC	”R.E. #6” is written after the location
Glyptapanteles Ashmead 1904	Glyptapanteles sp. 5 High Arctic	CNC620740	Canada	Nunavut	Ellesmere Island, Alert	82.5	-62.3	19 Jun. 1951	P. F. Bruggemann		CNC	”R.E. #6” is written after the location
Glyptapanteles Ashmead 1904	Glyptapanteles sp. 5 High Arctic	CNC620741	Canada	Nunavut	Ellesmere Island, Hazen Camp	81.8167	-71.3	30 Jul. 1963	R. E. Leech		CNC
Glyptapanteles Ashmead 1904	Glyptapanteles sp. 5 High Arctic	CNC620742	Canada	Nunavut	Ellesmere Island, Alert	82.5	-62.3	19 Jun. 1951	P. F. Bruggemann	reared	CNC	”R.E. #6” is written after the location
Glyptapanteles Ashmead 1904	Glyptapanteles sp. 5 High Arctic	CNC620743	Canada	Nunavut	Ellesmere Island, Alert	82.5	-62.3	19 Jun. 1951	P. F. Bruggemann	reared	CNC	”R.E. #6” is written after the location
Glyptapanteles Ashmead 1904	Glyptapanteles sp. 5 High Arctic	CNC620744	Canada	Nunavut	Ellesmere Island, Alert	82.5	-62.3	19 Jun. 1951	P. F. Bruggemann	reared	CNC	”R.E. #6” is written after the location
Glyptapanteles Ashmead 1904	Glyptapanteles sp. 5 High Arctic	CNC620745	Canada	Nunavut	Ellesmere Island, Alert	82.5	-62.3	19 Jun. 1951	P. F. Bruggemann	reared	CNC	”R.E. #6” is written after the location
Glyptapanteles Ashmead 1904	Glyptapanteles sp. 5 High Arctic	CNC620746	Canada	Nunavut	Ellesmere Island, Hazen Camp	81.8167	-71.3	26 Jul. 1963	R. E. Leech		CNC
Glyptapanteles Ashmead 1904	Glyptapanteles sp. 5 High Arctic	CNC620747	Canada	Nunavut	Ellesmere Island, Alert	82.5	-62.3	19 Jun. 1951	P. F. Bruggemann	reared	CNC	”R.E. #6” is written after the location
Glyptapanteles Ashmead 1904	Glyptapanteles sp. 5 High Arctic	MIC000295	Canada	Nunavut	Ellesmere Island, Alert, R. E. # 3	82.3	-62.18	19 Jun. 1951	P. F. Bruggemann		CNC
Glyptapanteles Ashmead 1904	Glyptapanteles sp. 5 High Arctic	MIC000305	Canada	Nunavut	Ellesmere Island, Alert, R. E. # 3	82.3	-62.18	19 Jun. 1951	P. F. Bruggemann		CNC
Glyptapanteles Ashmead 1904	Glyptapanteles sp. 6 Ellesmere Island	CNCH0480	Canada	Nunavut	Ellesmere Island, Fosheim Peninsula, Hot Weather Creek	79.9667	-84.4667	17 Jul. 1990	F. Brodo		CNC
Glyptapanteles Ashmead 1904	Glyptapanteles sp. 6 Ellesmere Island	CNCH0481	Canada	Nunavut	Ellesmere Island, Fosheim Peninsula, Hot Weather Creek	79.9667	-84.4667	17 Jul. 1990	F. Brodo		CNC
Glyptapanteles Ashmead 1904	Glyptapanteles sp. 6 Ellesmere Island	CNCH0482	Canada	Nunavut	Ellesmere Island, Fosheim Peninsula, Hot Weather Creek	79.9667	-84.4667	17 Jul. 1990	F. Brodo		CNC
Glyptapanteles Ashmead 1904	Glyptapanteles sp. 6 Ellesmere Island	CNCH0484	Canada	Nunavut	Ellesmere Island, Fosheim Peninsula, Hot Weather Creek	79.9667	-84.4667	17 Jul. 1990	F. Brodo		CNC
Glyptapanteles Ashmead 1904		BIOUG16577-D03	Canada	Northwest Territories	Banks Island, Aulavik National Park	73.228	-119.551	7 Jul. 2014	Parks Canada	Malaise trap	BIOUG	Malaise traps 209m apart Aulavik NP
Glyptapanteles Ashmead 1904		BIOUG16811-D10	Canada	Nunavut	Baffin Island, Auyuittuq National Park	66.89	-64.681	6 Aug. 2014	M.Nauyuk, M.Mahy	Malaise trap	BIOUG	mostly graminoids Auyuittuq NP
Glyptapanteles Ashmead 1904		CNCH0578	Canada	Nunavut	Bylot Island; Camp 1, Mesic	73.245	-80.6345	1 Aug. 2008	International Polar Year Project		CNC
Glyptapanteles Ashmead 1904		CNCH0579	Canada	Nunavut	Bylot Island; Camp 1, Mesic	73.245	-80.6345	1 Aug. 2008	International Polar Year Project		CNC
Glyptapanteles Ashmead 1904		CNCH0580	Canada	Nunavut	Bylot Island; Camp 1, Mesic	73.245	-80.6345	1 Aug. 2008	International Polar Year Project		CNC
Glyptapanteles compressiventris (Muesebeck 1921)		CNC661363	Canada	Nunavut	Baffin Island, Frobisher Bay			22 Jul. 1948	F.G. DiLabio		CNC
Glyptapanteles compressiventris (Muesebeck 1921)		CNC661364	Canada	Nunavut	Baffin Island, Head of Clyde Inlet			7 Aug. 1958	G.W. Shewell		CNC
Glyptapanteles compressiventris (Muesebeck 1921)		CNC661365	Canada	Nunavut	Baffin Island, Frobisher Bay			2 Aug. 1948	F.G. DiLabio		CNC
Glyptapanteles compressiventris (Muesebeck 1921)		CNC661366	Canada	Nunavut	Baffin Island, Lake Harbour			3 Aug. 1935	W.J. Brown		CNC
Glyptapanteles compressiventris (Muesebeck 1921)		CNC661367	Canada	Nunavut	Baffin Island, Lake Harbour			7 Aug. 1935	W.J. Brown		CNC
Glyptapanteles compressiventris (Muesebeck 1921)		CNC661368	Canada	Nunavut	Baffin Island, Clyde			Aug. 1958	J.E.H. Martin		CNC
Glyptapanteles compressiventris (Muesebeck 1921)		CNC661369	Canada	Nunavut	Baffin Island, Clyde			25 Aug. 1958	J.E.H. Martin		CNC
Glyptapanteles compressiventris (Muesebeck 1921)		CNC661370	Canada	Nunavut	Baffin Island, Clyde			13 Aug. 1958	J.E.H. Martin		CNC
Glyptapanteles compressiventris (Muesebeck 1921)		CNC661371	Canada	Nunavut	Baffin Island, Frobisher Bay			23 Jul. 1948	F.G. DiLabio		CNC
Glyptapanteles compressiventris (Muesebeck 1921)		CNC661372	Canada	Nunavut	Baffin Island, Frobisher Bay			26 Jul. 1948	F.G. DiLabio		CNC
Glyptapanteles compressiventris (Muesebeck 1921)		CNC661373	Canada	Nunavut	Frobisher			10-11 Aug. 1959	W.R.M. Mason		CNC
Glyptapanteles compressiventris (Muesebeck 1921)		CNC661374	Canada	Nunavut	Frobisher			10-11 Aug. 1959	W.R.M. Mason		CNC
Glyptapanteles compressiventris (Muesebeck 1921)		CNCHYM01251	Canada	Nunavut	Baffin Island, Head of Clyde Inlet	70.29	-68.31	7 Aug. 1958	J. E. H. Martin		CNC
Glyptapanteles compressiventris (Muesebeck 1921)		MIC000299	Canada	Nunavut	Dorset Island, Cape Dorset	64.14	-76.32	26 Aug. 1954	H. Huckel		CNC	Tentative species ID, as is a male specimen.
Glyptapanteles fulvipes (Haliday 1834)	-	CAM0642	Canada	Nunavut	Ellesmere Island, Fosheim Peninsula, Hot Weather Creek	79.9667	-84.4667	31 Jul. 1990	F. Brodo		CNC
Glyptapanteles fulvipes (Haliday 1834)	-	CAM0643	Canada	Nunavut	Ellesmere Island, Fosheim Peninsula, Hot Weather Creek	79.9667	-84.4667	2 Aug. 1990	F. Brodo		CNC
Glyptapanteles fulvipes (Haliday 1834)	-	CAM0644	Canada	Nunavut	Ellesmere Island, Fosheim Peninsula, Hot Weather Creek	79.9667	-84.4667	2 Aug. 1990	F. Brodo		CNC
Glyptapanteles fulvipes (Haliday 1834)	-	CAM0645	Canada	Nunavut	Ellesmere Island, Fosheim Peninsula, Hot Weather Creek	79.9667	-84.4667	2 Aug. 1990	F. Brodo		CNC
Glyptapanteles fulvipes (Haliday 1834)	-	CAM0646	Canada	Nunavut	Ellesmere Island, Fosheim Peninsula, Hot Weather Creek	79.9667	-84.4667	2 Aug. 1990	F. Brodo		CNC
Glyptapanteles fulvipes (Haliday 1834)	-	CAM0647	Canada	Nunavut	Ellesmere Island, Fosheim Peninsula, Hot Weather Creek	79.9667	-84.4667	2 Aug. 1990	F. Brodo		CNC
Glyptapanteles fulvipes (Haliday 1834)	-	CAM0648	Canada	Nunavut	Ellesmere Island, Fosheim Peninsula, Hot Weather Creek	79.9667	-84.4667	2 Aug. 1990	F. Brodo		CNC
Glyptapanteles fulvipes (Haliday 1834)	-	CAM0649	Canada	Nunavut	Ellesmere Island, Fosheim Peninsula, Hot Weather Creek	79.9667	-84.4667	2 Aug. 1990	F. Brodo		CNC
Glyptapanteles fulvipes (Haliday 1834)	-	CAM0650	Canada	Nunavut	Ellesmere Island, Fosheim Peninsula, Hot Weather Creek	79.9667	-84.4667	2 Aug. 1990	F. Brodo		CNC
Glyptapanteles fulvipes (Haliday 1834)	-	CAM0651	Canada	Nunavut	Ellesmere Island, Fosheim Peninsula, Hot Weather Creek	79.9667	-84.4667	7 Aug. 1991	F. Brodo		CNC
Glyptapanteles fulvipes (Haliday 1834)	-	CAM0652	Canada	Nunavut	Ellesmere Island, Fosheim Peninsula, Hot Weather Creek	79.9667	-84.4667	27 Jul. 1990	F. Brodo		CNC
Glyptapanteles fulvipes (Haliday 1834)	-	CAM0653	Canada	Nunavut	Ellesmere Island, Fosheim Peninsula, Hot Weather Creek	79.9667	-84.4667	9 Aug. 1991	F. Brodo		CNC
Glyptapanteles fulvipes (Haliday 1834)	-	CAM0654	Canada	Nunavut	Ellesmere Island, Fosheim Peninsula, Hot Weather Creek	79.9667	-84.4667	5 Aug. 1990	F. Brodo		CNC
Glyptapanteles fulvipes (Haliday 1834)	Glyptapanteles jft05	MIC000296	Canada	Nunavut	Alexandra Fiord; Ellesmere Island	78.53	-75.55	27 Jul. 1982	O. Kukal		CNC
Glyptapanteles fulvipes (Haliday 1834)	Glyptapanteles jft05	MIC000300	Canada	Nunavut	Baffin Island, Kimmirut	62.84	-69.86	7 Aug. 1935	W. Brown		CNC
Glyptapanteles fulvipes (Haliday 1834)	Glyptapanteles jft05	MIC000303	Canada	Nunavut	Baffin Island, Iqaluit	63.45	-68.31	31 Jul. 1948	F. DiLabio		CNC
Glyptapanteles fulvipes (Haliday 1834)	Glyptapanteles jft05	MIC000309	Greenland		Nedre Midsommer So, T 13-13; Greenland	82.15	-34.15	3 Aug. 1966	Canadian Peary Land Expedition		CNC
Glyptapanteles fulvipes (Haliday 1834)	Glyptapanteles jft05	MIC000310	Canada	Nunavut	Axel Heiberg Island; Axel Heiberg Island	79.25	-90.45	14 Aug. 1963	H. K. Rutz		CNC
Glyptapanteles fulvipes (Haliday 1834)	Glyptapanteles sp. 5 High Arctic	08WOLVES-00807	Canada	Nunavut	Qikiqtaaluk, Alert, Ellesmere Island, MAL-Meadow	82.3	-62.2	23 Jul. 2008	Jean-Remi Julien		CNC
Glyptapanteles fulvipes (Haliday 1834)	Glyptapanteles sp. 5 High Arctic	08WOLVES-00810	Canada	Nunavut	Qikiqtaaluk, Alert, Ellesmere Island, MAL-Meadow	82.3	-62.2	25 Jul. 2008	Jean-Remi Julien		CNC
Glyptapanteles fulvipes (Haliday 1834)	Glyptapanteles sp. 5 High Arctic	08WOLVES-00827	Canada	Nunavut	Qikiqtaaluk, Alert, Ellesmere Island, MAL-Curling Club	82.479	-62.3323	27 Jul. 2008	Jean-Remi Julien		CNC
Glyptapanteles fulvipes (Haliday 1834)	Glyptapanteles sp. 5 High Arctic	08WOLVES-00896	Canada	Nunavut	Qikiqtaaluk, Alert, Ellesmere Island, MAL-Curling Club	82.479	-62.3323	23 Jul. 2008	Jean-Remi Julien	malaise trap & pan trap	BIOUG
Glyptapanteles fulvipes (Haliday 1834)	Glyptapanteles sp. 5 High Arctic	08WOLVES-00897	Canada	Nunavut	Qikiqtaaluk, Alert, Ellesmere Island, MAL-Curling Club	82.479	-62.3323	23 Jul. 2008	Jean-Remi Julien	malaise trap & pan trap	BIOUG
Glyptapanteles fulvipes (Haliday 1834)	Glyptapanteles sp. 5 High Arctic	ZA2009-112	Greenland		Zackenberg Research Station	74.4667	-20.5667		T. Roslin & G. Varkonyi		MZH
Glyptapanteles fulvipes (Haliday 1834)		BIOUG01913-A09	Greenland		South of ZERO station	74.47	-20.576	9 Aug. 2011	Jesper B. Mosbacher		BIOUG
Glyptapanteles fulvipes (Haliday 1834)		BIOUG01913-A10	Greenland		South of ZERO station	74.47	-20.576	9 Aug. 2011	Jesper B. Mosbacher		BIOUG
Glyptapanteles fulvipes (Haliday 1834)		BIOUG01913-C02	Greenland		South of ZERO station	74.47	-20.576	13 Aug. 2011	Jesper B. Mosbacher		BIOUG
Glyptapanteles fulvipes (Haliday 1834)		BIOUG01913-C03	Greenland		South of ZERO station	74.47	-20.576	15 Aug. 2011	Jesper B. Mosbacher		BIOUG
Glyptapanteles fulvipes (Haliday 1834)		BIOUG01913-C11	Greenland		South of ZERO station	74.47	-20.576	13 Aug. 2011	Jesper B. Mosbacher		BIOUG
Glyptapanteles fulvipes (Haliday 1834)		BIOUG07716-A09	Greenland			74.467	-20.567	20 Jul. 2012	R. Kaartinen, T. Roslin, G. Varkonyi		MZH
Glyptapanteles fulvipes (Haliday 1834)		BIOUG07716-G03	Greenland			74.467	-20.567	18 Aug. 2012	R. Kaartinen, T. Roslin, G. Varkonyi		MZH
Glyptapanteles fulvipes (Haliday 1834)		BIOUG07716-H04	Greenland			74.467	-20.567	18 Aug. 2012	R. Kaartinen, T. Roslin, G. Varkonyi		MZH
Glyptapanteles fulvipes (Haliday 1834)		BIOUG07716-H09	Greenland			74.467	-20.567	18 Aug. 2012	R. Kaartinen, T. Roslin, G. Varkonyi		MZH
Glyptapanteles fulvipes (Haliday 1834)		BIOUG09184-A08	Greenland			74.467	-20.567	1 Aug. 2013	T. Roslin et al. leg.		BIOUG
Glyptapanteles fulvipes (Haliday 1834)		BIOUG09189-C02	Greenland			74.467	-20.567	8 Aug. 2013	T. Roslin et al. leg.		BIOUG
Glyptapanteles fulvipes (Haliday 1834)		BIOUG09189-C03	Greenland			74.467	-20.567	8 Aug. 2013	T. Roslin et al. leg.		BIOUG
Glyptapanteles fulvipes (Haliday 1834)		CNC280980	Canada	Nunavut	Baffin Island, Iqaluit	63.45	-68.31	12 Aug. 1948	Dilabio		CNC
Glyptapanteles fulvipes (Haliday 1834)		CNC620698	Canada	Nunavut	Baffin Island, Clyde	70.41	-68.58	24 Jul. 1958	J. E. H. Martin		CNC
Glyptapanteles fulvipes (Haliday 1834)		CNC620699	Canada	Nunavut	Baffin Island, Clyde	70.41	-68.58	10 Jul. 1958	J. E. H. Martin		CNC
Glyptapanteles fulvipes (Haliday 1834)		CNC620700	Greenland		Nedre Midsommer Sö	82.15	-34.15	5 Aug. 1966	Canadian Peary Land Expedition		CNC	Location can also be spelled ”Nedre Midsommer Sø”
Glyptapanteles fulvipes (Haliday 1834)		CNC620701	Greenland		Nedre Midsommer Sö	82.15	-34.15	14 Jul. 1966	Canadian Peary Land Expedition		CNC	Location can also be spelled ”Nedre Midsommer Sø”
Glyptapanteles fulvipes (Haliday 1834)		CNC620702	Greenland		Nedre Midsommer Sö	82.15	-34.15	3 Aug. 1966	Canadian Peary Land Expedition		CNC	Location can also be spelled ”Nedre Midsommer Sø”
Glyptapanteles fulvipes (Haliday 1834)		CNC620703	Canada	Nunavut	Baffin Island, Clyde	70.41	-68.58	27 Jul. 1958	J. E. H. Martin		CNC
Glyptapanteles fulvipes (Haliday 1834)		CNC620704	Greenland		Nedre Midsommer Sö	82.15	-34.15	26 Jul. 1966	Canadian Peary Land Expedition		CNC	Location can also be spelled ”Nedre Midsommer Sø”
Glyptapanteles fulvipes (Haliday 1834)		CNC620705	Greenland		Nedre Midsommer Sö	82.15	-34.15	3 Aug. 1966	Canadian Peary Land Expedition		CNC	Location can also be spelled ”Nedre Midsommer Sø”
Glyptapanteles fulvipes (Haliday 1834)		CNC620706	Greenland		Nedre Midsommer Sö	82.15	-34.15	3 Aug. 1966	Canadian Peary Land Expedition		CNC	Location can also be spelled ”Nedre Midsommer Sø”
Glyptapanteles fulvipes (Haliday 1834)		CNC620707	Greenland		Nedre Midsommer Sö	82.15	-34.15	26 Jul. 1966	Canadian Peary Land Expedition		CNC	Location can also be spelled ”Nedre Midsommer Sø”
Glyptapanteles fulvipes (Haliday 1834)		CNC620708	Greenland		Nedre Midsommer Sö	82.15	-34.15	3 Aug. 1966	Canadian Peary Land Expedition		CNC	Location can also be spelled ”Nedre Midsommer Sø”
Glyptapanteles fulvipes (Haliday 1834)		CNC620709	Greenland		Nedre Midsommer Sö	82.15	-34.15	26 Jul. 1966	Canadian Peary Land Expedition		CNC	Location can also be spelled ”Nedre Midsommer Sø”
Glyptapanteles fulvipes (Haliday 1834)		CNC620710	Greenland		Nedre Midsommer Sö	82.15	-34.15	26 Jul. 1966	Canadian Peary Land Expedition		CNC	Location can also be spelled ”Nedre Midsommer Sø”
Glyptapanteles fulvipes (Haliday 1834)		CNC620711	Canada	Nunavut	Baffin Island, Iqaluit	63.45	-68.31	12 Aug. 1948	F. G. DiLabio		CNC
Glyptapanteles fulvipes (Haliday 1834)		CNC620712	Canada	Nunavut	Baffin Island, Iqaluit	63.45	-68.31	31 Jul. 1948	F. G. DiLabio		CNC
Glyptapanteles fulvipes (Haliday 1834)		CNC620713	Canada	Nunavut	Baffin Island, Clyde	70.41	-68.58	3 Aug. 1958	J. E. H. Martin		CNC
Glyptapanteles fulvipes (Haliday 1834)		CNC620714	Canada	Nunavut	Baffin Island, Iqaluit	63.45	-68.31	10-11 Aug. 1959	W. R. M. Mason		CNC	Original label gives the location as ”Frobisher, N.W.T.”
Glyptapanteles fulvipes (Haliday 1834)		CNC620715	Canada	Nunavut	Baffin Island, Iqaluit	63.45	-68.31	6 Aug. 1948	F. G. DiLabio		CNC
Glyptapanteles fulvipes (Haliday 1834)		CNC620716	Canada	Nunavut	Baffin Island, Iqaluit	63.45	-68.31	19 Aug. 1959	W. R. M. Mason	reared	CNC	Original label gives the location as ”Frobisher, N.W.T.”; ”E.G. M. Bred.”
Glyptapanteles fulvipes (Haliday 1834)		CNC620717	Canada	Nunavut	Baffin Island, Iqaluit	63.45	-68.31	10-11 Aug. 1959	W. R. M. Mason		CNC	Original label gives the location as ”Frobisher, N.W.T.”
Glyptapanteles fulvipes (Haliday 1834)		CNC620718	Canada	Nunavut	Axel Heiberg Island	79.4167	-90.75	7 Aug. 1963	H. K. Rutz		CNC
Glyptapanteles fulvipes (Haliday 1834)		CNC620719	Canada	Nunavut	Axel Heiberg Island, Wolf River	79.4167	-90.75	10 Aug. 1963	H. K. Rutz		CNC
Glyptapanteles fulvipes (Haliday 1834)		CNC620720	Canada	Nunavut	Axel Heiberg Island	79.4167	-90.75	4 Aug. 1963	H. K. Rutz		CNC
Glyptapanteles fulvipes (Haliday 1834)		CNC620721	Canada	Nunavut	Axel Heiberg Island, Wolf River	79.4167	-90.75	10 Aug. 1963	H. K. Rutz		CNC
Glyptapanteles fulvipes (Haliday 1834)		CNC620722	Canada	Nunavut	Axel Heiberg Island, Wolf River	79.4167	-90.75	10 Aug. 1963	H. K. Rutz		CNC	”short ant.”
Glyptapanteles fulvipes (Haliday 1834)		CNC620723	Canada	Nunavut	Baffin Island, Iqaluit	63.45	-68.31	19 Aug. 1959	W. R. M. Mason	reared	CNC	Original label gives the location as ”Frobisher, N.W.T.”
Glyptapanteles fulvipes (Haliday 1834)		CNC620724	Canada	Nunavut	Baffin Island, Iqaluit	63.45	-68.31	31 Jul. 1948	F. G. DiLabio		CNC
Glyptapanteles fulvipes (Haliday 1834)		CNC620725	Canada	Nunavut	Baffin Island, Kimmirut	62.84	-69.86	10 Aug. 1935	W. J. Brown		CNC	Original label gives the location as ”Lake Harbour” - name changed in 1996
Glyptapanteles fulvipes (Haliday 1834)		CNC620726	Greenland		Nedre Midsommer Sö	82.15	-34.15	3 Aug. 1966	Canadian Peary Land Expedition		CNC	Location can also be spelled ”Nedre Midsommer Sø”
Glyptapanteles fulvipes (Haliday 1834)		CNC620727	Greenland		Nedre Midsommer Sö	82.15	-34.15	3 Aug. 1966	Canadian Peary Land Expedition		CNC	Location can also be spelled ”Nedre Midsommer Sø”
Glyptapanteles fulvipes (Haliday 1834)		CNC620733	Canada	Nunavut	Baffin Island, Clyde	70.41	-68.58	24 Jul. 1958	J. E. H. Martin		CNC	Not sure if ”Clyde” refers to Clyde River or to a station nearby (possibly one that closed in the 70s).
Glyptapanteles fulvipes (Haliday 1834)		CNC620734	Canada	Nunavut	Baffin Island, Iqaluit	63.45	-68.31	19 Aug. 1959	W. R. M. Mason	reared	CNC	12 cocoons under stone; Original label gives the location as ”Frobisher, N.W.T.”
Glyptapanteles fulvipes (Haliday 1834)		CNC620735	Canada	Nunavut	Axel Heiberg Island	79.4167	-90.75	25 Aug. 1963	H. K. Rutz	tin trap	CNC
Glyptapanteles fulvipes (Haliday 1834)		CNC620736	Canada	Nunavut	Axel Heiberg Island, Wolf River	79.4167	-90.75	23 Aug. 1963	H. K. Rutz		CNC
Glyptapanteles fulvipes (Haliday 1834)		CNC649733	Greenland		Sondrestrom Air Base	67.0106	-50.7092	15 Jul. 1952	W.J. Brown		CNC
Glyptapanteles fulvipes (Haliday 1834)		CNC649734	Greenland		Sondrestrom Air Base	67.0106	-50.7092	23 Jul. 1952	W.J. Brown		CNC
Glyptapanteles fulvipes (Haliday 1834)		CNC649735	Greenland		Sondrestrom Air Base	67.0106	-50.7092	Jul. 1952	W.J. Brown	reared	CNC
Glyptapanteles fulvipes (Haliday 1834)		CNC649736	Greenland		Sondrestrom Air Base	67.0106	-50.7092	Jul. 1952	W.J. Brown	reared	CNC
Glyptapanteles fulvipes (Haliday 1834)		CNC649737	Greenland		Sondrestrom Air Base	67.0106	-50.7092	Jul. 1952	W.J. Brown	reared	CNC
Glyptapanteles fulvipes (Haliday 1834)		CNC649738	Greenland		Sondrestrom Air Base	67.0106	-50.7092	Jul. 1952	W.J. Brown	reared	CNC
Glyptapanteles fulvipes (Haliday 1834)		CNC649739	Greenland		Sondrestrom Air Base	67.0106	-50.7092	Jul. 1952	W.J. Brown	reared	CNC
Glyptapanteles fulvipes (Haliday 1834)		CNC649740	Greenland		Sondrestrom Air Base	67.0106	-50.7092	Jul. 1952	W.J. Brown	reared	CNC
Glyptapanteles fulvipes (Haliday 1834)		CNC649741	Greenland		Sondrestrom Air Base	67.0106	-50.7092	Jul. 1952	W.J. Brown	reared	CNC
Glyptapanteles fulvipes (Haliday 1834)		CNC649742	Greenland		Sondrestrom Air Base	67.0106	-50.7092	Jul. 1952	W.J. Brown	reared	CNC
Glyptapanteles fulvipes (Haliday 1834)		CNC649743	Greenland		Sondrestrom Air Base	67.0106	-50.7092	Jul. 1952	W.J. Brown	reared	CNC
Glyptapanteles fulvipes (Haliday 1834)		CNC649744	Greenland		Sondrestrom Air Base	67.0106	-50.7092	Jul. 1952	W.J. Brown	reared	CNC
Glyptapanteles fulvipes (Haliday 1834)		CNC649745	Greenland		Sondrestrom Air Base	67.0106	-50.7092	Jul. 1952	W.J. Brown	reared	CNC
Glyptapanteles fulvipes (Haliday 1834)		CNC649746	Greenland		Sondrestrom Air Base	67.0106	-50.7092	Jul. 1952	W.J. Brown	reared	CNC
Glyptapanteles fulvipes (Haliday 1834)		CNC649747	Greenland		Sondrestrom Air Base	67.0106	-50.7092	Jul. 1952	W.J. Brown	reared	CNC
Glyptapanteles fulvipes (Haliday 1834)		CNC649748	Greenland		Sondrestrom Air Base	67.0106	-50.7092	Jul. 1952	W.J. Brown	reared	CNC
Glyptapanteles fulvipes (Haliday 1834)		CNC649749	Greenland		Sondrestrom Air Base	67.0106	-50.7092	Jul. 1952	W.J. Brown	reared	CNC
Glyptapanteles fulvipes (Haliday 1834)		CNC649750	Greenland		Sondrestrom Air Base	67.0106	-50.7092	Jul. 1952	W.J. Brown	reared	CNC
Glyptapanteles fulvipes (Haliday 1834)		CNC649751	Greenland		Sondrestrom Air Base	67.0106	-50.7092	Jul. 1952	W.J. Brown	reared	CNC
Glyptapanteles fulvipes (Haliday 1834)		CNC649752	Greenland		Sondrestrom Air Base	67.0106	-50.7092	Jul. 1952	W.J. Brown	reared	CNC
Glyptapanteles fulvipes (Haliday 1834)		CNC649753	Greenland		Sondrestrom Air Base	67.0106	-50.7092	Jul. 1952	W.J. Brown	reared	CNC
Glyptapanteles fulvipes (Haliday 1834)		CNC649754	Greenland		Sondrestrom Air Base	67.0106	-50.7092	Jul. 1952	W.J. Brown	reared	CNC
Glyptapanteles fulvipes (Haliday 1834)		CNC649755	Greenland		Sondrestrom Air Base	67.0106	-50.7092	Jul. 1952	W.J. Brown	reared	CNC
Glyptapanteles fulvipes (Haliday 1834)		CNC649756	Greenland		Sondrestrom Air Base	67.0106	-50.7092	Jul. 1952	W.J. Brown	reared	CNC
Glyptapanteles fulvipes (Haliday 1834)		CNC649757	Greenland		Sondrestrom Air Base	67.0106	-50.7092	Jul. 1952	W.J. Brown	reared	CNC
Glyptapanteles fulvipes (Haliday 1834)		CNC649758	Greenland		Sondrestrom Air Base	67.0106	-50.7092	Jul. 1952	W.J. Brown	reared	CNC
Glyptapanteles fulvipes (Haliday 1834)		CNC649759	Greenland		Sondrestrom Air Base	67.0106	-50.7092	Jul. 1952	W.J. Brown	reared	CNC
Glyptapanteles fulvipes (Haliday 1834)		CNC649760	Greenland		Sondrestrom Air Base	67.0106	-50.7092	Jul. 1952	W.J. Brown	reared	CNC
Glyptapanteles fulvipes (Haliday 1834)		CNC649761	Greenland		Sondrestrom Air Base	67.0106	-50.7092	Jul. 1952	W.J. Brown	reared	CNC
Glyptapanteles fulvipes (Haliday 1834)		CNC649762	Greenland		Sondrestrom Air Base	67.0106	-50.7092	Jul. 1952	W.J. Brown	reared	CNC
Glyptapanteles fulvipes (Haliday 1834)		CNC649763	Greenland		Sondrestrom Air Base	67.0106	-50.7092	Jul. 1952	W.J. Brown	reared	CNC
Glyptapanteles fulvipes (Haliday 1834)		CNC649764	Greenland		Sondrestrom Air Base	67.0106	-50.7092	Jul. 1952	W.J. Brown	reared	CNC
Glyptapanteles fulvipes (Haliday 1834)		CNC649765	Greenland		Sondrestrom Air Base	67.0106	-50.7092	Jul. 1952	W.J. Brown	reared	CNC
Glyptapanteles fulvipes (Haliday 1834)		CNC649766	Greenland		Sondrestrom Air Base	67.0106	-50.7092	Jul. 1952	W.J. Brown	reared	CNC
Glyptapanteles fulvipes (Haliday 1834)		CNC649767	Greenland		Sondrestrom Air Base	67.0106	-50.7092	Jul. 1952	W.J. Brown	reared	CNC
Glyptapanteles fulvipes (Haliday 1834)		CNC649768	Greenland		Sondrestrom Air Base	67.0106	-50.7092	Jul. 1952	W.J. Brown	reared	CNC
Glyptapanteles fulvipes (Haliday 1834)		CNC649769	Greenland		Sondrestrom Air Base	67.0106	-50.7092	Jul. 1952	W.J. Brown	reared	CNC
Glyptapanteles fulvipes (Haliday 1834)		CNC649770	Greenland		Sondrestrom Air Base	67.0106	-50.7092	Jul. 1952	W.J. Brown	reared	CNC
Glyptapanteles fulvipes (Haliday 1834)		CNC649771	Greenland		Sondrestrom Air Base	67.0106	-50.7092	Jul. 1952	W.J. Brown	reared	CNC
Glyptapanteles fulvipes (Haliday 1834)		CNC649772	Greenland		Sondrestrom Air Base	67.0106	-50.7092	Jul. 1952	W.J. Brown	reared	CNC
Glyptapanteles fulvipes (Haliday 1834)		CNC649773	Greenland		Sondrestrom Air Base	67.0106	-50.7092	Jul. 1952	W.J. Brown	reared	CNC
Glyptapanteles fulvipes (Haliday 1834)		CNC649774	Greenland		Sondrestrom Air Base	67.0106	-50.7092	Jul. 1952	W.J. Brown	reared	CNC
Glyptapanteles fulvipes (Haliday 1834)		CNC649775	Greenland		Sondrestrom Air Base	67.0106	-50.7092	Jul. 1952	W.J. Brown	reared	CNC
Glyptapanteles fulvipes (Haliday 1834)		CNC649776	Greenland		Sondrestrom Air Base	67.0106	-50.7092	Jul. 1952	W.J. Brown	reared	CNC
Glyptapanteles fulvipes (Haliday 1834)		CNC649777	Greenland		Sondrestrom Air Base	67.0106	-50.7092	Jul. 1952	W.J. Brown	reared	CNC
Glyptapanteles fulvipes (Haliday 1834)		CNC649778	Greenland		Sondrestrom Air Base	67.0106	-50.7092	Jul. 1952	W.J. Brown	reared	CNC
Glyptapanteles fulvipes (Haliday 1834)		CNC649779	Greenland		Sondrestrom Air Base	67.0106	-50.7092	Jul. 1952	W.J. Brown	reared	CNC
Glyptapanteles fulvipes (Haliday 1834)		CNC649780	Greenland		Sondrestrom Air Base	67.0106	-50.7092	Jul. 1952	W.J. Brown	reared	CNC
Glyptapanteles fulvipes (Haliday 1834)		CNC649781	Greenland		Sondrestrom Air Base	67.0106	-50.7092	Jul. 1952	W.J. Brown	reared	CNC
Glyptapanteles fulvipes (Haliday 1834)		CNC649782	Greenland		Sondrestrom Air Base	67.0106	-50.7092	Jul. 1952	W.J. Brown	reared	CNC
Glyptapanteles fulvipes (Haliday 1834)		CNC649783	Greenland		Sondrestrom Air Base	67.0106	-50.7092	Jul. 1952	W.J. Brown	reared	CNC
Glyptapanteles fulvipes (Haliday 1834)		CNC649784	Greenland		Sondrestrom Air Base	67.0106	-50.7092	Jul. 1952	W.J. Brown	reared	CNC
Glyptapanteles fulvipes (Haliday 1834)		CNC649785	Greenland		Sondrestrom Air Base	67.0106	-50.7092	Jul. 1952	W.J. Brown	reared	CNC
Glyptapanteles fulvipes (Haliday 1834)		CNC649786	Greenland		Sondrestrom Air Base	67.0106	-50.7092	Jul. 1952	W.J. Brown	reared	CNC
Glyptapanteles fulvipes (Haliday 1834)		CNC649787	Greenland		Sondrestrom Air Base	67.0106	-50.7092	Jul. 1952	W.J. Brown	reared	CNC
Glyptapanteles fulvipes (Haliday 1834)		CNC649788	Greenland		Sondrestrom Air Base	67.0106	-50.7092	Jul. 1952	W.J. Brown	reared	CNC
Glyptapanteles fulvipes (Haliday 1834)		CNC649789	Greenland		Sondrestrom Air Base	67.0106	-50.7092	Jul. 1952	W.J. Brown	reared	CNC
Glyptapanteles fulvipes (Haliday 1834)		CNC649790	Greenland		Sondrestrom Air Base	67.0106	-50.7092	Jul. 1952	W.J. Brown	reared	CNC
Glyptapanteles fulvipes (Haliday 1834)		CNC649791	Greenland		Sondrestrom Air Base	67.0106	-50.7092	Jul. 1952	W.J. Brown	reared	CNC
Glyptapanteles fulvipes (Haliday 1834)		CNC649792	Greenland		Sondrestrom Air Base	67.0106	-50.7092	Jul. 1952	W.J. Brown	reared	CNC
Glyptapanteles fulvipes (Haliday 1834)		CNC649793	Greenland		Sondrestrom Air Base	67.0106	-50.7092	Jul. 1952	W.J. Brown	reared	CNC
Glyptapanteles fulvipes (Haliday 1834)		CNC649794	Greenland		Sondrestrom Air Base	67.0106	-50.7092	Jul. 1952	W.J. Brown	reared	CNC
Glyptapanteles fulvipes (Haliday 1834)		CNC649795	Greenland		Sondrestrom Air Base	67.0106	-50.7092	Jul. 1952	W.J. Brown	reared	CNC
Glyptapanteles fulvipes (Haliday 1834)		CNC649796	Greenland		Sondrestrom Air Base	67.0106	-50.7092	Jul. 1952	W.J. Brown	reared	CNC
Glyptapanteles fulvipes (Haliday 1834)		CNC649797	Greenland		Sondrestrom Air Base	67.0106	-50.7092	Jul. 1952	W.J. Brown	reared	CNC
Glyptapanteles fulvipes (Haliday 1834)		CNC649798	Greenland		Sondrestrom Air Base	67.0106	-50.7092	Jul. 1952	W.J. Brown	reared	CNC
Glyptapanteles fulvipes (Haliday 1834)		CNC649799	Greenland		Sondrestrom Air Base	67.0106	-50.7092	Jul. 1952	W.J. Brown	reared	CNC
Glyptapanteles fulvipes (Haliday 1834)		CNC649800	Greenland		Sondrestrom Air Base	67.0106	-50.7092	Jul. 1952	W.J. Brown	reared	CNC
Glyptapanteles fulvipes (Haliday 1834)		CNC703770	Greenland		Lollandselv, flg. Hede			18 Aug. 1994	J. Böcher		ZMUC	Specimen not in CNC collection, information extracted from van Achterberg (2006) [The Braconidae (Hymenoptera) of Greenland. Zoologische Mededelingen Leiden. 80-1(2):13-62)].
Glyptapanteles fulvipes (Haliday 1834)		CNC703771	Greenland		Lollandselv, flg. Hede			18 Aug. 1994	J. Böcher		ZMUC	Specimen not in CNC collection, information extracted from van Achterberg (2006) [The Braconidae (Hymenoptera) of Greenland. Zoologische Mededelingen Leiden. 80-1(2):13-62)].
Glyptapanteles fulvipes (Haliday 1834)		CNC703772	Greenland		Lollandselv, flg. Hede			18 Aug. 1994	J. Böcher		ZMUC	Specimen not in CNC collection, information extracted from van Achterberg (2006) [The Braconidae (Hymenoptera) of Greenland. Zoologische Mededelingen Leiden. 80-1(2):13-62)].
Glyptapanteles fulvipes (Haliday 1834)		CNC703774	Greenland		Lollandselv, flg. Hede			18 Aug. 1994	J. Böcher		ZMUC	Specimen not in CNC collection, information extracted from van Achterberg (2006) [The Braconidae (Hymenoptera) of Greenland. Zoologische Mededelingen Leiden. 80-1(2):13-62)].
Glyptapanteles fulvipes (Haliday 1834)		CNC703775	Greenland		Lollandselv, flg. 14 Hede			8 Jul. 1994	J. Böcher		ZMUC	Specimen not in CNC collection, information extracted from van Achterberg (2006) [The Braconidae (Hymenoptera) of Greenland. Zoologische Mededelingen Leiden. 80-1(2):13-62)].
Glyptapanteles fulvipes (Haliday 1834)		CNC703776	Greenland		Coloradodal, Jamesonland			2 Aug. 1994	J. Böcher		ZMUC	Specimen not in CNC collection, information extracted from van Achterberg (2006) [The Braconidae (Hymenoptera) of Greenland. Zoologische Mededelingen Leiden. 80-1(2):13-62)].
Glyptapanteles fulvipes (Haliday 1834)		CNC703777	Greenland		South of Greenland, Narsarsuaq			14-27 Jul. 2004	T. Munk		ZMUC	Specimen not in CNC collection, information extracted from van Achterberg (2006) [The Braconidae (Hymenoptera) of Greenland. Zoologische Mededelingen Leiden. 80-1(2):13-62)].
Glyptapanteles fulvipes (Haliday 1834)		CNC703778	Greenland		South of Greenland, Narsarsuaq			14-27 Jul. 2004	T. Munk		ZMUC	Specimen not in CNC collection, information extracted from van Achterberg (2006) [The Braconidae (Hymenoptera) of Greenland. Zoologische Mededelingen Leiden. 80-1(2):13-62)].
Glyptapanteles fulvipes (Haliday 1834)		CNC703780	Greenland		South of Greenland, Narsarsuaq			14-27 Jul. 2004	T. Munk		RMNH	Specimen not in CNC collection, information extracted from van Achterberg (2006) [The Braconidae (Hymenoptera) of Greenland. Zoologische Mededelingen Leiden. 80-1(2):13-62)].
Glyptapanteles fulvipes (Haliday 1834)		CNC703781	Greenland		South of Greenland, Narsarsuaq			14-27 Jul. 2004	T. Munk		RMNH	Specimen not in CNC collection, information extracted from van Achterberg (2006) [The Braconidae (Hymenoptera) of Greenland. Zoologische Mededelingen Leiden. 80-1(2):13-62)].
Glyptapanteles fulvipes (Haliday 1834)		CNC703782	Greenland		South of Greenland, Narsarsuaq			14-27 Jul. 2004	T. Munk		ZMUC	Specimen not in CNC collection, information extracted from van Achterberg (2006) [The Braconidae (Hymenoptera) of Greenland. Zoologische Mededelingen Leiden. 80-1(2):13-62)].
Glyptapanteles fulvipes (Haliday 1834)		CNC703783	Greenland		Kap Farvel-omradet, Kangersuneq, Qingordleq, Igdlorssuit, 46			17 Jul. 1970	J. Böcher		ZMUC	Specimen not in CNC collection, information extracted from van Achterberg (2006) [The Braconidae (Hymenoptera) of Greenland. Zoologische Mededelingen Leiden. 80-1(2):13-62)].
Glyptapanteles fulvipes (Haliday 1834)		CNC703784	Greenland		Østgrønland, Godhab, Nordfjord			1 Aug. 1932	J. Braendegaard		ZMUC	Specimen not in CNC collection, information extracted from van Achterberg (2006) [The Braconidae (Hymenoptera) of Greenland. Zoologische Mededelingen Leiden. 80-1(2):13-62)].
Glyptapanteles fulvipes (Haliday 1834)		CNC703785	Greenland		Østgrønland, Godhab, Nordfjord			1 Aug. 1932	J. Braendegaard		ZMUC	Specimen not in CNC collection, information extracted from van Achterberg (2006) [The Braconidae (Hymenoptera) of Greenland. Zoologische Mededelingen Leiden. 80-1(2):13-62)].
Glyptapanteles fulvipes (Haliday 1834)		CNC703786	Greenland		Østgrønland, Godhab, Nordfjord			1 Aug. 1932	J. Braendegaard		ZMUC	Specimen not in CNC collection, information extracted from van Achterberg (2006) [The Braconidae (Hymenoptera) of Greenland. Zoologische Mededelingen Leiden. 80-1(2):13-62)].
Glyptapanteles fulvipes (Haliday 1834)		CNC703787	Greenland		Østgrønland, Godhab, Nordfjord			1 Aug. 1932	J. Braendegaard		ZMUC	Specimen not in CNC collection, information extracted from van Achterberg (2006) [The Braconidae (Hymenoptera) of Greenland. Zoologische Mededelingen Leiden. 80-1(2):13-62)].
Glyptapanteles fulvipes (Haliday 1834)		CNC703789	Greenland		Østgrønland, Godhab, Nordfjord			28 Jul. 1932	J. Braendegaard		ZMUC	Specimen not in CNC collection, information extracted from van Achterberg (2006) [The Braconidae (Hymenoptera) of Greenland. Zoologische Mededelingen Leiden. 80-1(2):13-62)].
Glyptapanteles fulvipes (Haliday 1834)		CNC703790	Greenland		Vestgrønland, Godhavn, Osterlien			9 Apr. 1992	J. Böcher		ZMUC	Specimen not in CNC collection, information extracted from van Achterberg (2006) [The Braconidae (Hymenoptera) of Greenland. Zoologische Mededelingen Leiden. 80-1(2):13-62)].
Glyptapanteles fulvipes (Haliday 1834)		CNC703791	Greenland		Østgrønland, Charcotsland			4 Aug. 1958	C. Vibe		ZMUC	Specimen not in CNC collection, information extracted from van Achterberg (2006) [The Braconidae (Hymenoptera) of Greenland. Zoologische Mededelingen Leiden. 80-1(2):13-62)].
Glyptapanteles fulvipes (Haliday 1834)		CNC703792	Greenland		Østgrønland, Charcotsland			7 Aug. 1958	C. Vibe		ZMUC	Specimen not in CNC collection, information extracted from van Achterberg (2006) [The Braconidae (Hymenoptera) of Greenland. Zoologische Mededelingen Leiden. 80-1(2):13-62)].
Glyptapanteles fulvipes (Haliday 1834)		CNC703793	Greenland		Østgrønland, Charcotsland			7 Aug. 1958	C. Vibe		ZMUC	Specimen not in CNC collection, information extracted from van Achterberg (2006) [The Braconidae (Hymenoptera) of Greenland. Zoologische Mededelingen Leiden. 80-1(2):13-62)].
Glyptapanteles fulvipes (Haliday 1834)		CNC703794	Greenland		Østgrønland, Charcotsland			7 Aug. 1958	C. Vibe		ZMUC	Specimen not in CNC collection, information extracted from van Achterberg (2006) [The Braconidae (Hymenoptera) of Greenland. Zoologische Mededelingen Leiden. 80-1(2):13-62)].
Glyptapanteles fulvipes (Haliday 1834)		CNC703795	Greenland		Østgrønland, Rypefjord			19 Aug. 1958	Chr. Vibe		ZMUC	Specimen not in CNC collection, information extracted from van Achterberg (2006) [The Braconidae (Hymenoptera) of Greenland. Zoologische Mededelingen Leiden. 80-1(2):13-62)].
Glyptapanteles fulvipes (Haliday 1834)		CNC703796	Greenland		Østgrønland, Gaaselandet, Faxe so			1958	Chr. Vibe		ZMUC	Specimen not in CNC collection, information extracted from van Achterberg (2006) [The Braconidae (Hymenoptera) of Greenland. Zoologische Mededelingen Leiden. 80-1(2):13-62)].
Glyptapanteles fulvipes (Haliday 1834)		CNC703797	Greenland		South-West of Greenland, Kangerdluarssuk	66.9833	-53.2	24-25 Jul. 2003			ZMUC	Specimen not in CNC collection, information extracted from van Achterberg (2006) [The Braconidae (Hymenoptera) of Greenland. Zoologische Mededelingen Leiden. 80-1(2):13-62)]. Kissavik Exp.
Glyptapanteles fulvipes (Haliday 1834)		CNC703798	Greenland		South-West of Greenland, Evigshedsfjord, Tasiussaq	65.8667	-52.7833	19-21 Jul. 2003			ZMUC	Specimen not in CNC collection, information extracted from van Achterberg (2006) [The Braconidae (Hymenoptera) of Greenland. Zoologische Mededelingen Leiden. 80-1(2):13-62)]. Kissavik Exp.
Glyptapanteles fulvipes (Haliday 1834)		CNC703799	Greenland		Perdlerfiup, Kangerdluc			25 Aug. 1968	J. Böcher		ZMUC	Specimen not in CNC collection, information extracted from van Achterberg (2006) [The Braconidae (Hymenoptera) of Greenland. Zoologische Mededelingen Leiden. 80-1(2):13-62)].
Glyptapanteles fulvipes (Haliday 1834)		CNC703800	Greenland		Kangiussaq			19-20 Jul. 2003			ZMUC	Specimen not in CNC collection, information extracted from van Achterberg (2006) [The Braconidae (Hymenoptera) of Greenland. Zoologische Mededelingen Leiden. 80-1(2):13-62)].
Glyptapanteles fulvipes (Haliday 1834)		CNC703801	Greenland		South-West of Greenland, Graedefjord, Nugssuaq	63.35	-50.9833	4 Jul. 2003			ZMUC	Specimen not in CNC collection, information extracted from van Achterberg (2006) [The Braconidae (Hymenoptera) of Greenland. Zoologische Mededelingen Leiden. 80-1(2):13-62)]. Kissavik Exp.
Glyptapanteles fulvipes (Haliday 1834)		CNC703802	Greenland		South-West of Greenland, Graedefjord, Nugssuaq	63.35	-50.9833	4 Jul. 2003			ZMUC	Specimen not in CNC collection, information extracted from van Achterberg (2006) [The Braconidae (Hymenoptera) of Greenland. Zoologische Mededelingen Leiden. 80-1(2):13-62)]. Kissavik Exp.
Glyptapanteles fulvipes (Haliday 1834)		CNC703803	Greenland		South-West of Greenland, Graedefjord, islet Nugssuaq	63.35	-50.9833	5 Jul. 2003			ZMUC	Specimen not in CNC collection, information extracted from van Achterberg (2006) [The Braconidae (Hymenoptera) of Greenland. Zoologische Mededelingen Leiden. 80-1(2):13-62)]. Kissavik Exp.
Glyptapanteles fulvipes (Haliday 1834)		CNC703804	Greenland		South-West of Greenland, Graedefjord, islet Nugssuaq	63.35	-50.9833	5 Jul. 2003			RMNH	Specimen not in CNC collection, information extracted from van Achterberg (2006) [The Braconidae (Hymenoptera) of Greenland. Zoologische Mededelingen Leiden. 80-1(2):13-62)]. Kissavik Exp.
Glyptapanteles fulvipes (Haliday 1834)		CNC703807	Greenland		South-West of Greenland, Ameralik, Equaluit ilordlit	64.1333	-50.4833	7-8 Jul. 2003			ZMUC	Specimen not in CNC collection, information extracted from van Achterberg (2006) [The Braconidae (Hymenoptera) of Greenland. Zoologische Mededelingen Leiden. 80-1(2):13-62)]. Kissavik Exp.
Glyptapanteles fulvipes (Haliday 1834)		CNC703808	Greenland		South-West of Greenland, Ameralik, Equaluit ilordlit	64.1333	-50.4833	7-8 Jul. 2003			RMNH	Specimen not in CNC collection, information extracted from van Achterberg (2006) [The Braconidae (Hymenoptera) of Greenland. Zoologische Mededelingen Leiden. 80-1(2):13-62)]. Kissavik Exp.
Glyptapanteles fulvipes (Haliday 1834)		CNC703809	Greenland		South-West of Greenland, Sondre Isortoq, Nuk	65.4667	-52.2	13-14 Jul. 2003			ZMUC	Specimen not in CNC collection, information extracted from van Achterberg (2006) [The Braconidae (Hymenoptera) of Greenland. Zoologische Mededelingen Leiden. 80-1(2):13-62)]. Kissavik Exp.
Glyptapanteles fulvipes (Haliday 1834)		CNC703810	Greenland		South-West of Greenland, Sondre Isortoq, Nuk	65.4667	-52.2	13-14 Jul. 2003			RMNH	Specimen not in CNC collection, information extracted from van Achterberg (2006) [The Braconidae (Hymenoptera) of Greenland. Zoologische Mededelingen Leiden. 80-1(2):13-62)]. Kissavik Exp.
Glyptapanteles fulvipes (Haliday 1834)		CNC703811	Greenland		Vestgrønland, Umanak Fjord, Inukavsait, Sagdliaruseq			21 Aug. 1968	J. Böcher		ZMUC	Specimen not in CNC collection, information extracted from van Achterberg (2006) [The Braconidae (Hymenoptera) of Greenland. Zoologische Mededelingen Leiden. 80-1(2):13-62)].
Glyptapanteles fulvipes (Haliday 1834)		CNC703812	Greenland		Vestgrønland, Umanak Fjord, Inukavsait, Sagdliaruseq			21 Aug. 1968	J. Böcher		ZMUC	Specimen not in CNC collection, information extracted from van Achterberg (2006) [The Braconidae (Hymenoptera) of Greenland. Zoologische Mededelingen Leiden. 80-1(2):13-62)].
Glyptapanteles fulvipes (Haliday 1834)		CNC703813	Greenland		Vestgrønland, Umanak Fjord, Inukavsait, Sagdliaruseq			21 Aug. 1968	J. Böcher		RMNH	Specimen not in CNC collection, information extracted from van Achterberg (2006) [The Braconidae (Hymenoptera) of Greenland. Zoologische Mededelingen Leiden. 80-1(2):13-62)].
Glyptapanteles fulvipes (Haliday 1834)		CNC703814	Greenland		Vestgrønland, Svartenhuk ost, Kangiussap qingua			16 Aug. 1968	J. Böcher		ZMUC	Specimen not in CNC collection, information extracted from van Achterberg (2006) [The Braconidae (Hymenoptera) of Greenland. Zoologische Mededelingen Leiden. 80-1(2):13-62)].
Glyptapanteles fulvipes (Haliday 1834)		CNC703815	Greenland		Vestgrønland, Svartenhuk ost, Kangiussap qingua			16 Aug. 1968	J. Böcher		ZMUC	Specimen not in CNC collection, information extracted from van Achterberg (2006) [The Braconidae (Hymenoptera) of Greenland. Zoologische Mededelingen Leiden. 80-1(2):13-62)].
Glyptapanteles fulvipes (Haliday 1834)		CNC703816	Greenland		Disko Bugt, Pikkerat, Kangursunq			14 Aug. 1958	J. Böcher		ZMUC	Specimen not in CNC collection, information extracted from van Achterberg (2006) [The Braconidae (Hymenoptera) of Greenland. Zoologische Mededelingen Leiden. 80-1(2):13-62)].
Glyptapanteles fulvipes (Haliday 1834)		CNC703817	Greenland		Disko Bugt, Pikkerat, Kangursunq			14 Aug. 1958	J. Böcher		ZMUC	Specimen not in CNC collection, information extracted from van Achterberg (2006) [The Braconidae (Hymenoptera) of Greenland. Zoologische Mededelingen Leiden. 80-1(2):13-62)].
Glyptapanteles fulvipes (Haliday 1834)		CNC703818	Greenland		Disko Bugt, Pikkerat, Kangursunq			14 Aug. 1958	J. Böcher		ZMUC	Specimen not in CNC collection, information extracted from van Achterberg (2006) [The Braconidae (Hymenoptera) of Greenland. Zoologische Mededelingen Leiden. 80-1(2):13-62)].
Glyptapanteles fulvipes (Haliday 1834)		CNC703819	Greenland		Disko Bugt, Pikkerat, Kangursunq			14 Aug. 1958	J. Böcher		ZMUC	Specimen not in CNC collection, information extracted from van Achterberg (2006) [The Braconidae (Hymenoptera) of Greenland. Zoologische Mededelingen Leiden. 80-1(2):13-62)].
Glyptapanteles fulvipes (Haliday 1834)		CNC703820	Greenland		Disko Bugt, Pikkerat, Kangursunq			14 Aug. 1958	J. Böcher		RMNH	Specimen not in CNC collection, information extracted from van Achterberg (2006) [The Braconidae (Hymenoptera) of Greenland. Zoologische Mededelingen Leiden. 80-1(2):13-62)].
Glyptapanteles fulvipes (Haliday 1834)		CNC703821	Greenland		Disko Bugt, Pikkerat, Kangursunq			14 Aug. 1958	J. Böcher		RMNH	Specimen not in CNC collection, information extracted from van Achterberg (2006) [The Braconidae (Hymenoptera) of Greenland. Zoologische Mededelingen Leiden. 80-1(2):13-62)].
Glyptapanteles fulvipes (Haliday 1834)		CNC703822	Greenland		Disko Bugt, Pikkerat, Kangursunq			22 Aug. 1958	J. Böcher		ZMUC	Specimen not in CNC collection, information extracted from van Achterberg (2006) [The Braconidae (Hymenoptera) of Greenland. Zoologische Mededelingen Leiden. 80-1(2):13-62)].
Glyptapanteles fulvipes (Haliday 1834)		CNC703823	Greenland		Disko Bugt, Pikkerat, Kangursunq			22 Aug. 1958	J. Böcher		ZMUC	Specimen not in CNC collection, information extracted from van Achterberg (2006) [The Braconidae (Hymenoptera) of Greenland. Zoologische Mededelingen Leiden. 80-1(2):13-62)].
Glyptapanteles fulvipes (Haliday 1834)		CNC703824	Greenland		Disko Bugt, Pikkerat, Kangursunq			20 Aug. 1958	J. Böcher		ZMUC	Specimen not in CNC collection, information extracted from van Achterberg (2006) [The Braconidae (Hymenoptera) of Greenland. Zoologische Mededelingen Leiden. 80-1(2):13-62)].
Glyptapanteles fulvipes (Haliday 1834)		CNC703825	Greenland		Disko Bugt, Pikkerat, Kangursunq (or Palitsoq?)			6 Aug. 1958	J. Böcher		ZMUC	Specimen not in CNC collection, information extracted from van Achterberg (2006) [The Braconidae (Hymenoptera) of Greenland. Zoologische Mededelingen Leiden. 80-1(2):13-62)].
Glyptapanteles fulvipes (Haliday 1834)		CNC703826	Greenland		Thule			27 Jul. 1951	Chr. Vibe		ZMUC	Specimen not in CNC collection, information extracted from van Achterberg (2006) [The Braconidae (Hymenoptera) of Greenland. Zoologische Mededelingen Leiden. 80-1(2):13-62)].
Glyptapanteles fulvipes (Haliday 1834)		CNC703827	Greenland		Tigssaluk			6 Aug. 1954	T. Andersen (G.Z.U.)		ZMUC	Specimen not in CNC collection, information extracted from van Achterberg (2006) [The Braconidae (Hymenoptera) of Greenland. Zoologische Mededelingen Leiden. 80-1(2):13-62)].
Glyptapanteles fulvipes (Haliday 1834)		CNC703886	Greenland		Rode, Q.			17 Aug. 1892	Deichmann		ZMUC	Specimen not in CNC collection, information extracted from van Achterberg (2006) [The Braconidae (Hymenoptera) of Greenland. Zoologische Mededelingen Leiden. 80-1(2):13-62)].
Glyptapanteles fulvipes (Haliday 1834)		CNC703887	Greenland		Hekla Havn			11 Aug. 1891	Deichmann		ZMUC	Specimen not in CNC collection, information extracted from van Achterberg (2006) [The Braconidae (Hymenoptera) of Greenland. Zoologische Mededelingen Leiden. 80-1(2):13-62)].
Glyptapanteles fulvipes (Haliday 1834)		CNC703888	Greenland		Hekla Havn			11 Aug. 1891	Deichmann		ZMUC	Specimen not in CNC collection, information extracted from van Achterberg (2006) [The Braconidae (Hymenoptera) of Greenland. Zoologische Mededelingen Leiden. 80-1(2):13-62)].
Glyptapanteles fulvipes (Haliday 1834)		CNC703889	Greenland		Sondrestrom Air Base			Jul. 1952	W.J. Brown		ZMUC	Specimen not in CNC collection, information extracted from van Achterberg (2006) [The Braconidae (Hymenoptera) of Greenland. Zoologische Mededelingen Leiden. 80-1(2):13-62)].
Glyptapanteles fulvipes (Haliday 1834)		CNC703890	Greenland		Sondrestrom Air Base			Jul. 1952	W.J. Brown		ZMUC	Specimen not in CNC collection, information extracted from van Achterberg (2006) [The Braconidae (Hymenoptera) of Greenland. Zoologische Mededelingen Leiden. 80-1(2):13-62)].
Glyptapanteles fulvipes (Haliday 1834)		CNC703891	Greenland		Sondrestrom Air Base			Jul. 1952	W.J. Brown		RMNH	Specimen not in CNC collection, information extracted from van Achterberg (2006) [The Braconidae (Hymenoptera) of Greenland. Zoologische Mededelingen Leiden. 80-1(2):13-62)].
Glyptapanteles fulvipes (Haliday 1834)		CNC703892	Greenland		Sondrestrom Air Base			Jul. 1952	W.J. Brown		RMNH	Specimen not in CNC collection, information extracted from van Achterberg (2006) [The Braconidae (Hymenoptera) of Greenland. Zoologische Mededelingen Leiden. 80-1(2):13-62)].
Glyptapanteles fulvipes (Haliday 1834)		CNC703893	Greenland		Sondrestrom Air Base			Jul. 1952	W.J. Brown		ZMUC	Specimen not in CNC collection, information extracted from van Achterberg (2006) [The Braconidae (Hymenoptera) of Greenland. Zoologische Mededelingen Leiden. 80-1(2):13-62)].
Glyptapanteles fulvipes (Haliday 1834)		CNC703894	Greenland		Sondrestrom Air Base			Jul. 1952	W.J. Brown		ZMUC	Specimen not in CNC collection, information extracted from van Achterberg (2006) [The Braconidae (Hymenoptera) of Greenland. Zoologische Mededelingen Leiden. 80-1(2):13-62)].
Glyptapanteles fulvipes (Haliday 1834)		CNC703895	Greenland		Sondrestrom Air Base			Jul. 1952	W.J. Brown		ZMUC	Specimen not in CNC collection, information extracted from van Achterberg (2006) [The Braconidae (Hymenoptera) of Greenland. Zoologische Mededelingen Leiden. 80-1(2):13-62)].
Glyptapanteles fulvipes (Haliday 1834)		CNC703896	Greenland		Sondrestrom Air Base			Jul. 1952	W.J. Brown		RMNH	Specimen not in CNC collection, information extracted from van Achterberg (2006) [The Braconidae (Hymenoptera) of Greenland. Zoologische Mededelingen Leiden. 80-1(2):13-62)].
Glyptapanteles fulvipes (Haliday 1834)		CNC703897	Greenland		Sondrestrom Air Base			Jul. 1952	W.J. Brown		RMNH	Specimen not in CNC collection, information extracted from van Achterberg (2006) [The Braconidae (Hymenoptera) of Greenland. Zoologische Mededelingen Leiden. 80-1(2):13-62)].
Glyptapanteles fulvipes (Haliday 1834)		CNC703898	Greenland		Sondrestrom Air Base			Jul. 1952	W.J. Brown		RMNH	Specimen not in CNC collection, information extracted from van Achterberg (2006) [The Braconidae (Hymenoptera) of Greenland. Zoologische Mededelingen Leiden. 80-1(2):13-62)].
Glyptapanteles fulvipes (Haliday 1834)		CNC703899	Greenland		Ikerasausak			14 Aug. 1933	M. Jörgensen		ZMUC	Specimen not in CNC collection, information extracted from van Achterberg (2006) [The Braconidae (Hymenoptera) of Greenland. Zoologische Mededelingen Leiden. 80-1(2):13-62)].
Glyptapanteles fulvipes (Haliday 1834)		CNC703900	Greenland		Sarqaq, Kugssuak			16 Jun. 1949	Chr. Vibe		ZMUC	Specimen not in CNC collection, information extracted from van Achterberg (2006) [The Braconidae (Hymenoptera) of Greenland. Zoologische Mededelingen Leiden. 80-1(2):13-62)].
Glyptapanteles fulvipes (Haliday 1834)		CNC703901	Greenland		Sarqaq, Kugssuak			16 Jun. 1949	Chr. Vibe		RMNH	Specimen not in CNC collection, information extracted from van Achterberg (2006) [The Braconidae (Hymenoptera) of Greenland. Zoologische Mededelingen Leiden. 80-1(2):13-62)].
Glyptapanteles fulvipes (Haliday 1834)		CNC703902	Greenland		Greenland East, Ile de France, Kap Saint Jacques			25 Jul.-14 Aug. 1988	Thomas Berg		ZMUC	Specimen not in CNC collection, information extracted from van Achterberg (2006) [The Braconidae (Hymenoptera) of Greenland. Zoologische Mededelingen Leiden. 80-1(2):13-62)].
Glyptapanteles fulvipes (Haliday 1834)		CNC703903	Greenland		Greenland East, Ile de France, Kap Saint Jacques			25 Jul.-14 Aug. 1988	Thomas Berg		RMNH	Specimen not in CNC collection, information extracted from van Achterberg (2006) [The Braconidae (Hymenoptera) of Greenland. Zoologische Mededelingen Leiden. 80-1(2):13-62)].
Glyptapanteles fulvipes (Haliday 1834)		CNC703904	Greenland		Greenland East, Ile de France, Kap Saint Jacques			25 Jul.-14 Aug. 1988	Thomas Berg		ZMUC	Specimen not in CNC collection, information extracted from van Achterberg (2006) [The Braconidae (Hymenoptera) of Greenland. Zoologische Mededelingen Leiden. 80-1(2):13-62)].
Glyptapanteles fulvipes (Haliday 1834)		CNC703905	Greenland		Greenland East, Ile de France, Kap Saint Jacques			25 Jul.-14 Aug. 1988	Thomas Berg		ZMUC	Specimen not in CNC collection, information extracted from van Achterberg (2006) [The Braconidae (Hymenoptera) of Greenland. Zoologische Mededelingen Leiden. 80-1(2):13-62)].
Glyptapanteles fulvipes (Haliday 1834)		CNC703906	Greenland		Greenland East, Ile de France, Kap Saint Jacques			25 Jul.-14 Aug. 1988	Thomas Berg		RMNH	Specimen not in CNC collection, information extracted from van Achterberg (2006) [The Braconidae (Hymenoptera) of Greenland. Zoologische Mededelingen Leiden. 80-1(2):13-62)].
Glyptapanteles fulvipes (Haliday 1834)		CNC703907	Greenland		Greenland East, Ile de France, Kap Saint Jacques			25 Jul.-14 Aug. 1988	Thomas Berg		RMNH	Specimen not in CNC collection, information extracted from van Achterberg (2006) [The Braconidae (Hymenoptera) of Greenland. Zoologische Mededelingen Leiden. 80-1(2):13-62)].
Glyptapanteles fulvipes (Haliday 1834)		CNC703908	Greenland		Greenland South-East, near Skoldungen, Dr Maries Dal			27 Jul.-5 Aug. 1992	S. Andersen		ZMUC	Specimen not in CNC collection, information extracted from van Achterberg (2006) [The Braconidae (Hymenoptera) of Greenland. Zoologische Mededelingen Leiden. 80-1(2):13-62)].
Glyptapanteles fulvipes (Haliday 1834)		CNC703909	Greenland		Greenland South-East, near Skoldungen, Bygden			19-27 Jul. 1992	S. Andersen		ZMUC	Specimen not in CNC collection, information extracted from van Achterberg (2006) [The Braconidae (Hymenoptera) of Greenland. Zoologische Mededelingen Leiden. 80-1(2):13-62)].
Glyptapanteles fulvipes (Haliday 1834)		CNC703910	Greenland		Greenland South-East, near Skoldungen, Bygden			19-27 Jul. 1992	S. Andersen		ZMUC	Specimen not in CNC collection, information extracted from van Achterberg (2006) [The Braconidae (Hymenoptera) of Greenland. Zoologische Mededelingen Leiden. 80-1(2):13-62)].
Glyptapanteles fulvipes (Haliday 1834)		CNC703911	Greenland		Greenland South-East, near Skoldengen, Qornoq			5-12 Aug. 1992	S. Andersen		ZMUC	Specimen not in CNC collection, information extracted from van Achterberg (2006) [The Braconidae (Hymenoptera) of Greenland. Zoologische Mededelingen Leiden. 80-1(2):13-62)].
Glyptapanteles fulvipes (Haliday 1834)		CNC703912	Greenland		Kristianshaab			4 Aug. 1890			ZMUC	Specimen not in CNC collection, information extracted from van Achterberg (2006) [The Braconidae (Hymenoptera) of Greenland. Zoologische Mededelingen Leiden. 80-1(2):13-62)].
Glyptapanteles fulvipes (Haliday 1834)		CNC703913	Greenland		Kristianshaab			1 Aug. 1890			ZMUC	Specimen not in CNC collection, information extracted from van Achterberg (2006) [The Braconidae (Hymenoptera) of Greenland. Zoologische Mededelingen Leiden. 80-1(2):13-62)].
Glyptapanteles fulvipes (Haliday 1834)		CNCH0465	Canada	Nunavut	Ellesmere Island, Fosheim Peninsula, Hot Weather Creek	79.9667	-84.4667	2 Aug. 1990	F. Brodo		CNC
Glyptapanteles fulvipes (Haliday 1834)		CNCH0466	Canada	Nunavut	Ellesmere Island, Fosheim Peninsula, Hot Weather Creek	79.9667	-84.4667	2 Aug. 1990	F. Brodo		CNC
Glyptapanteles fulvipes (Haliday 1834)		CNCH0467	Canada	Nunavut	Ellesmere Island, Fosheim Peninsula, Hot Weather Creek	79.9667	-84.4667	2 Aug. 1990	F. Brodo		CNC
Glyptapanteles fulvipes (Haliday 1834)		CNCH0468	Canada	Nunavut	Ellesmere Island, Fosheim Peninsula, Hot Weather Creek	79.9667	-84.4667	2 Aug. 1990	F. Brodo		CNC
Glyptapanteles fulvipes (Haliday 1834)		CNCH0469	Canada	Nunavut	Ellesmere Island, Fosheim Peninsula, Hot Weather Creek	79.9667	-84.4667	2 Aug. 1990	F. Brodo		CNC
Glyptapanteles fulvipes (Haliday 1834)		CNCH0470	Canada	Nunavut	Ellesmere Island, Fosheim Peninsula, Hot Weather Creek	79.9667	-84.4667	2 Aug. 1990	F. Brodo		CNC
Glyptapanteles fulvipes (Haliday 1834)		CNCH0471	Canada	Nunavut	Ellesmere Island, Fosheim Peninsula, Hot Weather Creek	79.9667	-84.4667	2 Aug. 1990	F. Brodo		CNC
Glyptapanteles fulvipes (Haliday 1834)		CNCH0472	Canada	Nunavut	Ellesmere Island, Fosheim Peninsula, Hot Weather Creek	79.9667	-84.4667	2 Aug. 1990	F. Brodo		CNC
Glyptapanteles fulvipes (Haliday 1834)		CNCH0473	Canada	Nunavut	Ellesmere Island, Fosheim Peninsula, Hot Weather Creek	79.9667	-84.4667	31 Jul. 1990	F. Brodo		CNC
Glyptapanteles fulvipes (Haliday 1834)		CNCH0475	Canada	Nunavut	Ellesmere Island, Fosheim Peninsula, Hot Weather Creek	79.9667	-84.4667	31 Jul. 1990	F. Brodo		CNC
Glyptapanteles fulvipes (Haliday 1834)		CNCH0479	Canada	Nunavut	Ellesmere Island, Fosheim Peninsula, Hot Weather Creek	79.9667	-84.4667	12 Aug. 1990	F. Brodo		CNC
Glyptapanteles fulvipes (Haliday 1834)		CNCH0483	Canada	Nunavut	Ellesmere Island, Fosheim Peninsula, Hot Weather Creek	79.9667	-84.4667	17 Jul. 1990	F. Brodo		CNC
Glyptapanteles fulvipes (Haliday 1834)		CNCHYM01283	Greenland		Sondrestrom Air Base	67.0106	-50.7092	1 Jul. 1952	W. J. Brown	reared	CNC	ex. Noctuid
Glyptapanteles fulvipes (Haliday 1834)		GOU0521	Canada	Northwest Territories	Banks Island, Sachs Harbour	71.9865	-125.243	22 Jul. 2010	Goulet & Boudreault		CNC	The specimen identity as G. flavipes is temporal, as it seems to be a related but different species.; The specimen identity as G. fulvipes is temporal, as it seems to be a related but different species.
Glyptapanteles fulvipes (Haliday 1834)		MIC000301	Canada	Nunavut	Axel Heiberg Island; Axel Heiberg Island	79.25	-90.45	20 Jul. 1963	H. K. Rutz		CNC
Glyptapanteles fulvipes (Haliday 1834)		MIC000323	Canada	Nunavut	I. Fosheim Pen., Hot Weather Cr.; Ellesmere Island	79.58	-84.28	7 Aug. 1991	F. Brodo		CNC
Glyptapanteles fulvipes (Haliday 1834)		ZA2009-101	Greenland		Zackenberg Research Station	74.4667	-20.5667		T. Roslin & G. Varkonyi		MZH
Glyptapanteles fulvipes (Haliday 1834)		ZA2009-104	Greenland		Zackenberg Research Station	74.4667	-20.5667		T. Roslin & G. Varkonyi		MZH
Glyptapanteles fulvipes (Haliday 1834)		ZA2009-105	Greenland		Zackenberg Research Station	74.4667	-20.5667		T. Roslin & G. Varkonyi		MZH
Glyptapanteles fulvipes (Haliday 1834)		ZA2009-107	Greenland		Zackenberg Research Station	74.4667	-20.5667		T. Roslin & G. Varkonyi		MZH
Glyptapanteles fulvipes (Haliday 1834)		ZA2009-114	Greenland		Zackenberg Research Station	74.4667	-20.5667		T. Roslin & G. Varkonyi		MZH
Glyptapanteles fulvipes (Haliday 1834)		ZA2009-115	Greenland		Zackenberg Research Station	74.4667	-20.5667		T. Roslin & G. Varkonyi		MZH
Glyptapanteles fulvipes (Haliday 1834)		ZA2009-116	Greenland		Zackenberg Research Station	74.4667	-20.5667		T. Roslin & G. Varkonyi		MZH
Illidops Mason 1981	Illidops sp. 1	MIC000287	Greenland		Nedre Midsommer So, T 35-12; Greenland	82.15	-34.15	5 Aug. 1966	Canadian Peary Land Expedition		CNC
Illidops Mason 1981	Illidops sp. 2, Illidops jft02	CAM0657	Canada	Northwest Territories	Victoria Island	71.2833	-114	5 Jul. 1975	G & M. Wood		CNC
Illidops Mason 1981	Illidops sp. 2, Illidops jft02	CNC497431	Canada	Northwest Territories	Victoria Island	71.2833	-114	11-15 Jul. 1975	G. & M. Wood		CNC
Illidops Mason 1981	Illidops sp. 2, Illidops jft02	CNC497432	Canada	Northwest Territories	Victoria Island	71.2833	-114	11-15 Jul. 1975	G. & M. Wood		CNC
Illidops Mason 1981	Illidops sp. 2, Illidops jft02	CNC497433	Canada	Northwest Territories	Victoria Island	71.2833	-114	11-15 Jul. 1975	G. & M. Wood		CNC
Illidops Mason 1981	Illidops sp. 2, Illidops jft02	CNC497434	Canada	Northwest Territories	Victoria Island	71.2833	-114	11-15 Jul. 1975	G. & M. Wood		CNC
Illidops Mason 1981	Illidops sp. 2, Illidops jft02	CNC497435	Canada	Northwest Territories	Victoria Island	71.2833	-114	1-5 Jul. 1975	G. & M. Wood		CNC
Illidops Mason 1981	Illidops sp. 2, Illidops jft02	CNC497436	Canada	Northwest Territories	Victoria Island	71.2833	-114	1-5 Jul. 1975	G. & M. Wood		CNC
Illidops Mason 1981	Illidops sp. 2, Illidops jft02	CNC497437	Canada	Northwest Territories	Victoria Island	71.2833	-114	11-15 Jul. 1975	G. & M. Wood		CNC
Illidops Mason 1981	Illidops sp. 2, Illidops jft02	CNC497438	Canada	Northwest Territories	Victoria Island	71.2833	-114	11-15 Jul. 1975	G. & M. Wood		CNC
Illidops Mason 1981	Illidops sp. 2, Illidops jft02	CNC497439	Canada	Northwest Territories	Victoria Island	71.2833	-114	1-5 Jul. 1975	G. & M. Wood		CNC
Illidops Mason 1981	Illidops sp. 2, Illidops jft02	CNC497440	Canada	Northwest Territories	Melville Island, Bailey Point	75	-115	20 Jul. 1965	J.E.H.Martin		CNC
Illidops Mason 1981	Illidops sp. 2, Illidops jft02	CNC497441	Canada	Nunavut	Baffin Island, Clyde	70.41	-68.58	24 Jul. 1958	J.E.H.Martin		CNC
Illidops Mason 1981	Illidops sp. 2, Illidops jft02	CNC497442	Canada	Nunavut	Baffin Island, Iqaluit	63.45	-68.31	10-11 Aug. 1959	W. R. M. Mason		CNC
Illidops Mason 1981	Illidops sp. 2, Illidops jft02	CNC497443	Canada	Nunavut	Baffin Island, Iqaluit	63.45	-68.31	10-11 Aug. 1959	W. R. M. Mason		CNC
Illidops Mason 1981	Illidops sp. 2, Illidops jft02	MIC000285	Canada	Northwest Territories	Melville Island, Bailey Point	75	-115	25 Jul. 1965	J. E. Martin		CNC
Illidops Mason 1981	Illidops sp. 2, Illidops jft02	MIC000288	Canada	Nunavut	Devon Island	75	-85	15 Aug. 1970	J. Ryan		CNC
Illidops Mason 1981	Illidops sp. 2, Illidops jft02	MIC000291	Canada	Northwest Territories	Victoria Island	71.2833	-114	13 Jul. 1975	G & M. Wood		CNC
Microgaster Latreille 1804	Microgaster jft08	MIC000311	Canada	Northwest Territories	Banks Island, Masik River	71.5333	-123.8	8 Jul. 1968	W. Mason		CNC
Microplitis coactus (Lundbeck 1896)	Microplitis jft41	MIC000315	Canada	Nunavut	Devon Island	75	-85	15 Jul. 1971	J. Ryan & C. Hergert		CNC
Microplitis coactus (Lundbeck 1896)		CAM0641	Canada	Nunavut	Ellesmere Island, Fosheim Peninsula, Hot Weather Creek	79.9667	-84.4667	31 Jul. 1990	F. Brodo		CNC
Microplitis coactus (Lundbeck 1896)		CNC497575	Canada	Nunavut	Ellesmere Island, Hazen Camp	81.8167	-71.3				CNC
Microplitis coactus (Lundbeck 1896)		CNC497576	Canada	Nunavut	Ellesmere Island, Hazen Camp	81.8167	-71.3				CNC
Microplitis coactus (Lundbeck 1896)		CNC497577	Canada	Nunavut	Devon Island	75	-85				CNC
Microplitis coactus (Lundbeck 1896)		CNC497578	Canada	Nunavut	Devon Island	75	-85				CNC
Microplitis coactus (Lundbeck 1896)		CNC497579	Canada	Nunavut	Devon Island	75	-85				CNC
Microplitis coactus (Lundbeck 1896)		CNC497580	Canada	Nunavut	Devon Island	75	-85				CNC
Microplitis coactus (Lundbeck 1896)		CNC497581	Canada	Nunavut	Devon Island	75	-85				CNC
Microplitis coactus (Lundbeck 1896)		CNC497582	Canada	Nunavut	Devon Island	75	-85				CNC
Microplitis coactus (Lundbeck 1896)		CNC497583	Canada	Nunavut	Devon Island	75	-85				CNC
Microplitis coactus (Lundbeck 1896)		CNC497584	Canada	Nunavut	Devon Island	75	-85				CNC
Microplitis coactus (Lundbeck 1896)		CNC497585	Canada	Nunavut	Devon Island	75	-85				CNC
Microplitis coactus (Lundbeck 1896)		CNC497586	Canada	Nunavut	Devon Island	75	-85				CNC
Microplitis coactus (Lundbeck 1896)		CNC497587	Canada	Nunavut	Ellesmere Island, Hazen Camp	81.8167	-71.3				CNC
Microplitis coactus (Lundbeck 1896)		CNC497588	Canada	Nunavut	Ellesmere Island, Hazen Camp	81.8167	-71.3				CNC
Microplitis coactus (Lundbeck 1896)		CNC497589	Canada	Nunavut	Ellesmere Island, Hazen Camp	81.8167	-71.3				CNC
Microplitis coactus (Lundbeck 1896)		CNC497590	Canada	Nunavut	Ellesmere Island, Hazen Camp	81.8167	-71.3				CNC
Microplitis coactus (Lundbeck 1896)		CNC497591	Canada	Nunavut	Ellesmere						CNC
Microplitis coactus (Lundbeck 1896)		CNC497592	Canada	Nunavut	Ellesmere						CNC
Microplitis coactus (Lundbeck 1896)		CNC497593	Canada	Nunavut	Ellesmere Island, Hazen Camp	81.8167	-71.3				CNC
Microplitis coactus (Lundbeck 1896)		CNC497594	Canada	Nunavut	Ellesmere						CNC
Microplitis coactus (Lundbeck 1896)		CNC497595	Canada	Nunavut	Ellesmere						CNC
Microplitis coactus (Lundbeck 1896)		CNC497596	Canada	Nunavut	Ellesmere Island, Hazen Camp	81.8167	-71.3				CNC
Microplitis coactus (Lundbeck 1896)		CNC497597	Canada	Nunavut	Ellesmere						CNC
Microplitis coactus (Lundbeck 1896)		CNC497598	Canada	Nunavut	Ellesmere Island, Hazen Camp	81.8167	-71.3				CNC
Microplitis coactus (Lundbeck 1896)		CNC497599	Canada	Nunavut	Ellesmere						CNC
Microplitis coactus (Lundbeck 1896)		CNC497600	Canada	Nunavut	Ellesmere Island, Hazen Camp	81.8167	-71.3				CNC
Microplitis coactus (Lundbeck 1896)		CNC497601	Canada	Nunavut	Ellesmere						CNC
Microplitis coactus (Lundbeck 1896)		CNC703916	Greenland		Müs. Drews						ZMUC	Specimen not in CNC collection, information extracted from van Achterberg (2006) [The Braconidae (Hymenoptera) of Greenland. Zoologische Mededelingen Leiden. 80-1(2):13-62)].
Microplitis coactus (Lundbeck 1896)		CNC703917	Greenland		Müs. Drews						ZMUC	Specimen not in CNC collection, information extracted from van Achterberg (2006) [The Braconidae (Hymenoptera) of Greenland. Zoologische Mededelingen Leiden. 80-1(2):13-62)].
Microplitis coactus (Lundbeck 1896)		CNC703918	Greenland		Müs. Drews						ZMUC	Specimen not in CNC collection, information extracted from van Achterberg (2006) [The Braconidae (Hymenoptera) of Greenland. Zoologische Mededelingen Leiden. 80-1(2):13-62)].
Microplitis coactus (Lundbeck 1896)		CNC703919	Greenland		Müs. Drews						ZMUC	Specimen not in CNC collection, information extracted from van Achterberg (2006) [The Braconidae (Hymenoptera) of Greenland. Zoologische Mededelingen Leiden. 80-1(2):13-62)].
Microplitis coactus (Lundbeck 1896)		CNC703920	Greenland		Müs. Drews						ZMUC	Specimen not in CNC collection, information extracted from van Achterberg (2006) [The Braconidae (Hymenoptera) of Greenland. Zoologische Mededelingen Leiden. 80-1(2):13-62)].
Microplitis coactus (Lundbeck 1896)		CNC703921	Greenland		Müs. Drews						ZMUC	Specimen not in CNC collection, information extracted from van Achterberg (2006) [The Braconidae (Hymenoptera) of Greenland. Zoologische Mededelingen Leiden. 80-1(2):13-62)].
Microplitis coactus (Lundbeck 1896)		CNC703922	Greenland		Müs. Drews						ZMUC	Specimen not in CNC collection, information extracted from van Achterberg (2006) [The Braconidae (Hymenoptera) of Greenland. Zoologische Mededelingen Leiden. 80-1(2):13-62)].
Microplitis coactus (Lundbeck 1896)		CNC703923	Greenland		Greenland South-West, Buksefjorden, east	63.9167	-50.9167	6 Jul. 2003			ZMUC	Specimen not in CNC collection, information extracted from van Achterberg (2006) [The Braconidae (Hymenoptera) of Greenland. Zoologische Mededelingen Leiden. 80-1(2):13-62)]. Kissavik Exp.
Microplitis coactus (Lundbeck 1896)		CNC703924	Greenland		Greenland South-West, Graedefjord, islet Nugssuaq	63.3667	-50.9333	5 Jul. 2003			ZMUC	Specimen not in CNC collection, information extracted from van Achterberg (2006) [The Braconidae (Hymenoptera) of Greenland. Zoologische Mededelingen Leiden. 80-1(2):13-62)]. Kissavik Exp.
Microplitis coactus (Lundbeck 1896)		CNC703925	Greenland		Greenland South-West, Graedefjord, islet Nugssuaq	63.3667	-50.9333	5 Jul. 2003			RMNH	Specimen not in CNC collection, information extracted from van Achterberg (2006) [The Braconidae (Hymenoptera) of Greenland. Zoologische Mededelingen Leiden. 80-1(2):13-62)]. Kissavik Exp.
Microplitis coactus (Lundbeck 1896)		CNC703926	Greenland		Greenland South-West, Graedefjord, Nugssuaq	63.3667	-50.9333	4 Jul. 2003			ZMUC	Specimen not in CNC collection, information extracted from van Achterberg (2006) [The Braconidae (Hymenoptera) of Greenland. Zoologische Mededelingen Leiden. 80-1(2):13-62)]. Kissavik Exp.
Microplitis coactus (Lundbeck 1896)		CNC703927	Greenland		Vestgrønland, Disko Bugt, Akugdlit			5 Jul. 1989	J. Böcher		ZMUC	Specimen not in CNC collection, information extracted from van Achterberg (2006) [The Braconidae (Hymenoptera) of Greenland. Zoologische Mededelingen Leiden. 80-1(2):13-62)].
Microplitis coactus (Lundbeck 1896)		CNC703928	Greenland		Vestgrønland, Disko Bugt, Akugdlit			5 Jul. 1989	J. Böcher		RMNH	Specimen not in CNC collection, information extracted from van Achterberg (2006) [The Braconidae (Hymenoptera) of Greenland. Zoologische Mededelingen Leiden. 80-1(2):13-62)].
Microplitis coactus (Lundbeck 1896)		CNC703929	Greenland		Vestgrønland, Disko Bugt, Qeqertassussuk	68.5833	-51.0833	6-12 Aug. 1987	J. Böcher		ZMUC	Specimen not in CNC collection, information extracted from van Achterberg (2006) [The Braconidae (Hymenoptera) of Greenland. Zoologische Mededelingen Leiden. 80-1(2):13-62)].
Microplitis coactus (Lundbeck 1896)		CNC703930	Greenland		Vestgrønland, Disko Bugt, Qeqertassussuk	68.5833	-51.0833	6-12 Aug. 1987	J. Böcher		ZMUC	Specimen not in CNC collection, information extracted from van Achterberg (2006) [The Braconidae (Hymenoptera) of Greenland. Zoologische Mededelingen Leiden. 80-1(2):13-62)].
Microplitis coactus (Lundbeck 1896)		CNC703931	Greenland		Vestgrønland, Disko Bugt, Qeqertassussuk	68.5833	-51.0833	6-12 Aug. 1987	J. Böcher		ZMUC	Specimen not in CNC collection, information extracted from van Achterberg (2006) [The Braconidae (Hymenoptera) of Greenland. Zoologische Mededelingen Leiden. 80-1(2):13-62)].
Microplitis coactus (Lundbeck 1896)		CNC703932	Greenland		Vestgrønland, Disko Bugt, Qeqertassussuk	68.5833	-51.0833	6-12 Aug. 1987	J. Böcher		ZMUC	Specimen not in CNC collection, information extracted from van Achterberg (2006) [The Braconidae (Hymenoptera) of Greenland. Zoologische Mededelingen Leiden. 80-1(2):13-62)].
Microplitis coactus (Lundbeck 1896)		CNC703933	Greenland		Vestgrønland, Disko Bugt, Qeqertassussuk	68.5833	-51.0833	6-12 Aug. 1987	J. Böcher		ZMUC	Specimen not in CNC collection, information extracted from van Achterberg (2006) [The Braconidae (Hymenoptera) of Greenland. Zoologische Mededelingen Leiden. 80-1(2):13-62)].
Microplitis coactus (Lundbeck 1896)		CNC703934	Greenland		Narssarssuaq	61.1667	-45.4167	6 Aug.-6 Sep. 1985	P. Nielsen		ZMUC	Specimen not in CNC collection, information extracted from van Achterberg (2006) [The Braconidae (Hymenoptera) of Greenland. Zoologische Mededelingen Leiden. 80-1(2):13-62)].
Microplitis coactus (Lundbeck 1896)		CNC703935	Greenland		Narssarssuaq	61.1667	-45.4167	16 Jul. 1983	P. Nielsen		ZMUC	Specimen not in CNC collection, information extracted from van Achterberg (2006) [The Braconidae (Hymenoptera) of Greenland. Zoologische Mededelingen Leiden. 80-1(2):13-62)].
Microplitis coactus (Lundbeck 1896)		CNC703936	Greenland		Narssarssuaq	61.1667	-45.4167	17 Jul.-6 Aug. 1985	P. Nielsen		RMNH	Specimen not in CNC collection, information extracted from van Achterberg (2006) [The Braconidae (Hymenoptera) of Greenland. Zoologische Mededelingen Leiden. 80-1(2):13-62)].
Microplitis coactus (Lundbeck 1896)		CNC703937	Greenland		Narssarssuaq	61.1667	-45.4167	1 Aug.-6 Sep. 1985	P. Nielsen		ZMUC	Specimen not in CNC collection, information extracted from van Achterberg (2006) [The Braconidae (Hymenoptera) of Greenland. Zoologische Mededelingen Leiden. 80-1(2):13-62)].
Microplitis coactus (Lundbeck 1896)		CNC703938	Greenland		Narssarssuaq	61.1667	-45.4167	1 Aug.-6 Sep. 1985	P. Nielsen		RMNH	Specimen not in CNC collection, information extracted from van Achterberg (2006) [The Braconidae (Hymenoptera) of Greenland. Zoologische Mededelingen Leiden. 80-1(2):13-62)].
Microplitis coactus (Lundbeck 1896)		CNC703939	Greenland		Narssarssuaq	61.1667	-45.4167	5 Jun.-17 Jul. 1985	P. Nielsen		ZMUC	Specimen not in CNC collection, information extracted from van Achterberg (2006) [The Braconidae (Hymenoptera) of Greenland. Zoologische Mededelingen Leiden. 80-1(2):13-62)].
Microplitis coactus (Lundbeck 1896)		CNC703940	Greenland		Narssarssuaq	61.1667	-45.4167	5 Jun.-17 Jul. 1985	P. Nielsen		ZMUC	Specimen not in CNC collection, information extracted from van Achterberg (2006) [The Braconidae (Hymenoptera) of Greenland. Zoologische Mededelingen Leiden. 80-1(2):13-62)].
Microplitis coactus (Lundbeck 1896)		CNC703941	Greenland		Narssarssuaq	61.1667	-45.4167	5 Jun.-17 Jul. 1985	P. Nielsen		ZMUC	Specimen not in CNC collection, information extracted from van Achterberg (2006) [The Braconidae (Hymenoptera) of Greenland. Zoologische Mededelingen Leiden. 80-1(2):13-62)].
Microplitis coactus (Lundbeck 1896)		CNC703942	Greenland		Narssarssuaq	61.1667	-45.4167	1 Aug. 1983	P. Nielsen		ZMUC	Specimen not in CNC collection, information extracted from van Achterberg (2006) [The Braconidae (Hymenoptera) of Greenland. Zoologische Mededelingen Leiden. 80-1(2):13-62)].
Microplitis coactus (Lundbeck 1896)		CNC703946	Greenland		Narssarssuaq	61.1667	-45.4167	20 Jun. 1983	P. Nielsen		ZMUC	Specimen not in CNC collection, information extracted from van Achterberg (2006) [The Braconidae (Hymenoptera) of Greenland. Zoologische Mededelingen Leiden. 80-1(2):13-62)].
Microplitis coactus (Lundbeck 1896)		CNC703947	Greenland		Grønnedal			4 Jul. 1950	C. Vibe		ZMUC	Specimen not in CNC collection, information extracted from van Achterberg (2006) [The Braconidae (Hymenoptera) of Greenland. Zoologische Mededelingen Leiden. 80-1(2):13-62)].
Microplitis coactus (Lundbeck 1896)		CNC703948	Greenland		Upernaviarsuk	60.75	-45.9	24 Jul. 1983	P. Nielsen		ZMUC	Specimen not in CNC collection, information extracted from van Achterberg (2006) [The Braconidae (Hymenoptera) of Greenland. Zoologische Mededelingen Leiden. 80-1(2):13-62)].
Microplitis coactus (Lundbeck 1896)		CNC703951	Greenland		Upernaviarsuk	60.75	-45.9	2-26 Jul. 1984	P. Nielsen		RMNH	Specimen not in CNC collection, information extracted from van Achterberg (2006) [The Braconidae (Hymenoptera) of Greenland. Zoologische Mededelingen Leiden. 80-1(2):13-62)].
Microplitis coactus (Lundbeck 1896)		CNC703954	Greenland		Qagssiarssuk	61.15	-45.5333	26 Jun.-21 Jul. 1984	P. Nielsen		ZMUC	Specimen not in CNC collection, information extracted from van Achterberg (2006) [The Braconidae (Hymenoptera) of Greenland. Zoologische Mededelingen Leiden. 80-1(2):13-62)].
Microplitis coactus (Lundbeck 1896)		CNC703955	Greenland		Qagssiarssuk	61.15	-45.5333	22 Jul. 1983	P. Nielsen		ZMUC	Specimen not in CNC collection, information extracted from van Achterberg (2006) [The Braconidae (Hymenoptera) of Greenland. Zoologische Mededelingen Leiden. 80-1(2):13-62)].
Microplitis coactus (Lundbeck 1896)		CNC703956	Greenland		Qagssiarssuk	61.15	-45.5333	22 Jul. 1983	P. Nielsen		ZMUC	Specimen not in CNC collection, information extracted from van Achterberg (2006) [The Braconidae (Hymenoptera) of Greenland. Zoologische Mededelingen Leiden. 80-1(2):13-62)].
Microplitis coactus (Lundbeck 1896)		CNC703957	Greenland		Qagssiarssuk	61.15	-45.5333	18 Aug. 1983	P. Nielsen		ZMUC	Specimen not in CNC collection, information extracted from van Achterberg (2006) [The Braconidae (Hymenoptera) of Greenland. Zoologische Mededelingen Leiden. 80-1(2):13-62)].
Microplitis coactus (Lundbeck 1896)		CNC703991	Greenland		Greenland South-East, Skjoldungen, Bygden			19-27 Jul. 1992	S. Andersen		ZMUC	Specimen not in CNC collection, information extracted from van Achterberg (2006) [The Braconidae (Hymenoptera) of Greenland. Zoologische Mededelingen Leiden. 80-1(2):13-62)].
Microplitis coactus (Lundbeck 1896)		CNC703992	Greenland		Greenland South-East, Skjoldungen, Bygden			19-27 Jul. 1992	S. Andersen		ZMUC	Specimen not in CNC collection, information extracted from van Achterberg (2006) [The Braconidae (Hymenoptera) of Greenland. Zoologische Mededelingen Leiden. 80-1(2):13-62)].
Microplitis coactus (Lundbeck 1896)		CNC703993	Greenland		Greenland South-East, Skjoldungen, Bygden			19-27 Jul. 1992	S. Andersen		ZMUC	Specimen not in CNC collection, information extracted from van Achterberg (2006) [The Braconidae (Hymenoptera) of Greenland. Zoologische Mededelingen Leiden. 80-1(2):13-62)].
Microplitis coactus (Lundbeck 1896)		CNC703994	Greenland		Greenland South-East, Skjoldungen, Bygden			19-27 Jul. 1992	S. Andersen		ZMUC	Specimen not in CNC collection, information extracted from van Achterberg (2006) [The Braconidae (Hymenoptera) of Greenland. Zoologische Mededelingen Leiden. 80-1(2):13-62)].
Microplitis coactus (Lundbeck 1896)		CNC703995	Greenland		Greenland South-East, Skjoldungen, Bygden			19-27 Jul. 1992	S. Andersen		RMNH	Specimen not in CNC collection, information extracted from van Achterberg (2006) [The Braconidae (Hymenoptera) of Greenland. Zoologische Mededelingen Leiden. 80-1(2):13-62)].
Microplitis coactus (Lundbeck 1896)		CNC703996	Greenland		Greenland South-East, Skjoldungen, Bygden			19-27 Jul. 1992	S. Andersen		RMNH	Specimen not in CNC collection, information extracted from van Achterberg (2006) [The Braconidae (Hymenoptera) of Greenland. Zoologische Mededelingen Leiden. 80-1(2):13-62)].
Microplitis coactus (Lundbeck 1896)		CNC703997	Greenland		Greenland South-East, Skjoldungen, Bygden			19-27 Jul. 1992	S. Andersen		RMNH	Specimen not in CNC collection, information extracted from van Achterberg (2006) [The Braconidae (Hymenoptera) of Greenland. Zoologische Mededelingen Leiden. 80-1(2):13-62)].
Microplitis coactus (Lundbeck 1896)		CNC704006	Greenland		Engelskmandens Havn			9 Aug. 1969	J. Böcher		ZMUC	Specimen not in CNC collection, information extracted from van Achterberg (2006) [The Braconidae (Hymenoptera) of Greenland. Zoologische Mededelingen Leiden. 80-1(2):13-62)].
Microplitis coactus (Lundbeck 1896)		CNC704007	Greenland		Qapiarfik			16 Sep. 1969	C. Vibe		ZMUC	Specimen not in CNC collection, information extracted from van Achterberg (2006) [The Braconidae (Hymenoptera) of Greenland. Zoologische Mededelingen Leiden. 80-1(2):13-62)].
Microplitis coactus (Lundbeck 1896)		CNC704009	Greenland		Greenland South-East, Skoldungen, Dr Marries Dal			27 Jul.-5 Aug. 1992	S. Andersen		ZMUC	Specimen not in CNC collection, information extracted from van Achterberg (2006) [The Braconidae (Hymenoptera) of Greenland. Zoologische Mededelingen Leiden. 80-1(2):13-62)].
Microplitis coactus (Lundbeck 1896)		CNC704010	Greenland		Umanak			9-28 Jul. 1970	P. Volsøe		ZMUC	Specimen not in CNC collection, information extracted from van Achterberg (2006) [The Braconidae (Hymenoptera) of Greenland. Zoologische Mededelingen Leiden. 80-1(2):13-62)].
Microplitis coactus (Lundbeck 1896)		CNC704011	Greenland		Umanak			9-28 Jul. 1970	P. Volsøe		ZMUC	Specimen not in CNC collection, information extracted from van Achterberg (2006) [The Braconidae (Hymenoptera) of Greenland. Zoologische Mededelingen Leiden. 80-1(2):13-62)].
Microplitis coactus (Lundbeck 1896)		CNC704012	Greenland		Umanak			9-28 Jul. 1970	P. Volsøe		RMNH	Specimen not in CNC collection, information extracted from van Achterberg (2006) [The Braconidae (Hymenoptera) of Greenland. Zoologische Mededelingen Leiden. 80-1(2):13-62)].
Microplitis coactus (Lundbeck 1896)		CNC704013	Greenland		Umanak			9-28 Jul. 1970	P. Volsøe		RMNH	Specimen not in CNC collection, information extracted from van Achterberg (2006) [The Braconidae (Hymenoptera) of Greenland. Zoologische Mededelingen Leiden. 80-1(2):13-62)].
Microplitis coactus (Lundbeck 1896)		CNC704014	Greenland		Kap Farvel-omradet, Pamiagdluk, Anordliuitsoq			20 Jul. 1970	J. Böcher		ZMUC	Specimen not in CNC collection, information extracted from van Achterberg (2006) [The Braconidae (Hymenoptera) of Greenland. Zoologische Mededelingen Leiden. 80-1(2):13-62)].
Microplitis coactus (Lundbeck 1896)		CNC704015	Greenland		Kap Farvel-omradet, Pamiagdluk, Anordliuitsoq			20 Jul. 1970	J. Böcher		ZMUC	Specimen not in CNC collection, information extracted from van Achterberg (2006) [The Braconidae (Hymenoptera) of Greenland. Zoologische Mededelingen Leiden. 80-1(2):13-62)].
Microplitis coactus (Lundbeck 1896)		CNC704016	Greenland		Kap Farvel-omradet, Pamiagdluk, Anordliuitsoq			20 Jul. 1970	J. Böcher		ZMUC	Specimen not in CNC collection, information extracted from van Achterberg (2006) [The Braconidae (Hymenoptera) of Greenland. Zoologische Mededelingen Leiden. 80-1(2):13-62)].
Microplitis coactus (Lundbeck 1896)		CNC704017	Greenland		Kap Farvel-omradet, Pamiagdluk, Anordliuitsoq			20 Jul. 1970	J. Böcher		ZMUC	Specimen not in CNC collection, information extracted from van Achterberg (2006) [The Braconidae (Hymenoptera) of Greenland. Zoologische Mededelingen Leiden. 80-1(2):13-62)].
Microplitis coactus (Lundbeck 1896)		CNC704018	Greenland		Kap Farvel-omradet, Pamiagdluk, Anordliuitsoq			20 Jul. 1970	J. Böcher		RMNH	Specimen not in CNC collection, information extracted from van Achterberg (2006) [The Braconidae (Hymenoptera) of Greenland. Zoologische Mededelingen Leiden. 80-1(2):13-62)].
Microplitis coactus (Lundbeck 1896)		CNC704019	Greenland		Kap Farvel-omradet, Pamiagdluk, Anordliuitsoq			20 Jul. 1970	J. Böcher		RMNH	Specimen not in CNC collection, information extracted from van Achterberg (2006) [The Braconidae (Hymenoptera) of Greenland. Zoologische Mededelingen Leiden. 80-1(2):13-62)].
Microplitis coactus (Lundbeck 1896)		CNC704020	Greenland		Kap Farvel-omradet, Pamiagdluk, Anordliuitsoq			20 Jul. 1970	J. Böcher		RMNH	Specimen not in CNC collection, information extracted from van Achterberg (2006) [The Braconidae (Hymenoptera) of Greenland. Zoologische Mededelingen Leiden. 80-1(2):13-62)].
Microplitis coactus (Lundbeck 1896)		CNC704021	Greenland		Kap Farvel-omradet, Pamiagdluk, Anordliuitsoq			20 Jul. 1970	J. Böcher		RMNH	Specimen not in CNC collection, information extracted from van Achterberg (2006) [The Braconidae (Hymenoptera) of Greenland. Zoologische Mededelingen Leiden. 80-1(2):13-62)].
Microplitis coactus (Lundbeck 1896)		CNC704022	Greenland		Kap Farvel-omradet, Pamiagdluk, Anordliuitsoq			15-30 Jul. 1970	J. Böcher		ZMUC	Specimen not in CNC collection, information extracted from van Achterberg (2006) [The Braconidae (Hymenoptera) of Greenland. Zoologische Mededelingen Leiden. 80-1(2):13-62)].
Microplitis coactus (Lundbeck 1896)		CNC704023	Greenland		Kap Farvel-omradet, Pamiagdluk, Anordliuitsoq			30 Jul. 1970	J. Böcher		ZMUC	Specimen not in CNC collection, information extracted from van Achterberg (2006) [The Braconidae (Hymenoptera) of Greenland. Zoologische Mededelingen Leiden. 80-1(2):13-62)].
Microplitis coactus (Lundbeck 1896)		CNC704024	Greenland		Kap Farvel-omradet, Pamiagdluk, Anordliuitsoq			7 Aug. 1970	J. Böcher		ZMUC	Specimen not in CNC collection, information extracted from van Achterberg (2006) [The Braconidae (Hymenoptera) of Greenland. Zoologische Mededelingen Leiden. 80-1(2):13-62)].
Microplitis coactus (Lundbeck 1896)		CNC704025	Greenland		Kap Farvel-omradet, Pamiagdluk, Anordliuitsoq			7 Aug. 1970	J. Böcher		ZMUC	Specimen not in CNC collection, information extracted from van Achterberg (2006) [The Braconidae (Hymenoptera) of Greenland. Zoologische Mededelingen Leiden. 80-1(2):13-62)].
Microplitis coactus (Lundbeck 1896)		CNC704026	Greenland		Kap Farvel-omradet, Pamiagdluk, Anordliuitsoq			3 Aug. 1970	J. Böcher		ZMUC	Specimen not in CNC collection, information extracted from van Achterberg (2006) [The Braconidae (Hymenoptera) of Greenland. Zoologische Mededelingen Leiden. 80-1(2):13-62)].
Microplitis coactus (Lundbeck 1896)		CNC704027	Greenland		Kap Farvel-omradet, Pamiagdluk, Anordliuitsoq			19 Jul. 1970	J. Böcher		ZMUC	Specimen not in CNC collection, information extracted from van Achterberg (2006) [The Braconidae (Hymenoptera) of Greenland. Zoologische Mededelingen Leiden. 80-1(2):13-62)].
Microplitis coactus (Lundbeck 1896)		CNC704028	Greenland		Kap Farvel-omradet, Pamiagdluk, Anordliuitsoq			19 Jul. 1970	J. Böcher		ZMUC	Specimen not in CNC collection, information extracted from van Achterberg (2006) [The Braconidae (Hymenoptera) of Greenland. Zoologische Mededelingen Leiden. 80-1(2):13-62)].
Microplitis coactus (Lundbeck 1896)		CNC704029	Greenland		Nanortakk			30 Jul. 1948	C. Vibe		ZMUC	Specimen not in CNC collection, information extracted from van Achterberg (2006) [The Braconidae (Hymenoptera) of Greenland. Zoologische Mededelingen Leiden. 80-1(2):13-62)].
Microplitis coactus (Lundbeck 1896)		CNC704030	Greenland		Nanortakk			30 Jul. 1948	C. Vibe		ZMUC	Specimen not in CNC collection, information extracted from van Achterberg (2006) [The Braconidae (Hymenoptera) of Greenland. Zoologische Mededelingen Leiden. 80-1(2):13-62)].
Microplitis coactus (Lundbeck 1896)		CNC704031	Greenland		Nanortakk			30 Jul. 1948	C. Vibe		ZMUC	Specimen not in CNC collection, information extracted from van Achterberg (2006) [The Braconidae (Hymenoptera) of Greenland. Zoologische Mededelingen Leiden. 80-1(2):13-62)].
Microplitis coactus (Lundbeck 1896)		CNC704032	Greenland		Nanortakk			30 Jul. 1948	C. Vibe		RMNH	Specimen not in CNC collection, information extracted from van Achterberg (2006) [The Braconidae (Hymenoptera) of Greenland. Zoologische Mededelingen Leiden. 80-1(2):13-62)].
Microplitis coactus (Lundbeck 1896)		CNC704033	Greenland		Nanortakk			30 Jul. 1948	C. Vibe		RMNH	Specimen not in CNC collection, information extracted from van Achterberg (2006) [The Braconidae (Hymenoptera) of Greenland. Zoologische Mededelingen Leiden. 80-1(2):13-62)].
Microplitis coactus (Lundbeck 1896)		CNC704034	Greenland		Greenland West, Sarqaq, Kapisigdlit			1 Aug. 1973	J. Böcher		ZMUC	Specimen not in CNC collection, information extracted from van Achterberg (2006) [The Braconidae (Hymenoptera) of Greenland. Zoologische Mededelingen Leiden. 80-1(2):13-62)].
Microplitis coactus (Lundbeck 1896)		CNC704035	Greenland		Greenland SG, Narsarssuaq	61.2	-50.6667	1991	J. Böcher		ZMUC	Specimen not in CNC collection, information extracted from van Achterberg (2006) [The Braconidae (Hymenoptera) of Greenland. Zoologische Mededelingen Leiden. 80-1(2):13-62)].
Microplitis coactus (Lundbeck 1896)		CNC704036	Greenland		Narssarssuaq, Hospitalsdalen, 10 m.o.h.	61.1667	-45.4167	16-24 Jul. 1984	P. Nielsen		ZMUC	Specimen not in CNC collection, information extracted from van Achterberg (2006) [The Braconidae (Hymenoptera) of Greenland. Zoologische Mededelingen Leiden. 80-1(2):13-62)].
Microplitis coactus (Lundbeck 1896)		CNC704037	Greenland		Narssarssuaq, Hospitalsdalen, 10 m.o.h.	61.1667	-45.4167	16-24 Jul. 1984	P. Nielsen		RMNH	Specimen not in CNC collection, information extracted from van Achterberg (2006) [The Braconidae (Hymenoptera) of Greenland. Zoologische Mededelingen Leiden. 80-1(2):13-62)].
Microplitis coactus (Lundbeck 1896)		CNC704038	Greenland		Narssarssuaq, Hospitalsdalen, 10 m.o.h.	61.1667	-45.4167	24 Jul.-12 Aug. 1984	P. Nielsen		ZMUC	Specimen not in CNC collection, information extracted from van Achterberg (2006) [The Braconidae (Hymenoptera) of Greenland. Zoologische Mededelingen Leiden. 80-1(2):13-62)].
Microplitis coactus (Lundbeck 1896)		CNC704039	Greenland		Narssarssuaq, Hospitalsdalen, 10 m.o.h.	61.1667	-45.4167	5-16 Jul. 1984	P. Nielsen		ZMUC	Specimen not in CNC collection, information extracted from van Achterberg (2006) [The Braconidae (Hymenoptera) of Greenland. Zoologische Mededelingen Leiden. 80-1(2):13-62)].
Microplitis coactus (Lundbeck 1896)		CNC704040	Greenland		Narssarssuaq, Hospitalsdalen, 10 m.o.h.	61.1667	-45.4167	4 Jul. 1983	P. Nielsen		ZMUC	Specimen not in CNC collection, information extracted from van Achterberg (2006) [The Braconidae (Hymenoptera) of Greenland. Zoologische Mededelingen Leiden. 80-1(2):13-62)].
Microplitis coactus (Lundbeck 1896)		CNC704041	Greenland		Narssarssuaq, Hospitalsdalen, 10 m.o.h.	61.1667	-45.4167	4 Jul. 1983	P. Nielsen		ZMUC	Specimen not in CNC collection, information extracted from van Achterberg (2006) [The Braconidae (Hymenoptera) of Greenland. Zoologische Mededelingen Leiden. 80-1(2):13-62)].
Microplitis coactus (Lundbeck 1896)		CNC704042	Greenland		Narssarssuaq, Hospitalsdalen, 10 m.o.h.	61.1667	-45.4167	4 Jul. 1983	P. Nielsen		ZMUC	Specimen not in CNC collection, information extracted from van Achterberg (2006) [The Braconidae (Hymenoptera) of Greenland. Zoologische Mededelingen Leiden. 80-1(2):13-62)].
Microplitis coactus (Lundbeck 1896)		CNC704043	Greenland		Narssarssuaq, Hospitalsdalen, 10 m.o.h.	61.1667	-45.4167	4 Jul. 1983	P. Nielsen		ZMUC	Specimen not in CNC collection, information extracted from van Achterberg (2006) [The Braconidae (Hymenoptera) of Greenland. Zoologische Mededelingen Leiden. 80-1(2):13-62)].
Microplitis coactus (Lundbeck 1896)		CNC704045	Greenland		Greenland WG, Søndre Stronfjord	67.0333	-45.4	2 Aug. 1992	J. Böcher		ZMUC	Specimen not in CNC collection, information extracted from van Achterberg (2006) [The Braconidae (Hymenoptera) of Greenland. Zoologische Mededelingen Leiden. 80-1(2):13-62)].
Microplitis coactus (Lundbeck 1896)		CNC704046	Greenland		Greenland WG, Søndre Stronfjord	67.0333	-45.4	18-21 Jul. 1984	J. Böcher		ZMUC	Specimen not in CNC collection, information extracted from van Achterberg (2006) [The Braconidae (Hymenoptera) of Greenland. Zoologische Mededelingen Leiden. 80-1(2):13-62)].
Microplitis coactus (Lundbeck 1896)		CNC704048	Greenland		Greenland SW, Godhavn	69.0025	-55.5667	20 Jul. 1992	J. Böcher		ZMUC	Specimen not in CNC collection, information extracted from van Achterberg (2006) [The Braconidae (Hymenoptera) of Greenland. Zoologische Mededelingen Leiden. 80-1(2):13-62)].
Microplitis coactus (Lundbeck 1896)		CNCH0474	Canada	Nunavut	Ellesmere Island, Fosheim Peninsula, Hot Weather Creek	79.9667	-84.4667	31 Jul. 1990	F. Brodo		CNC
Microplitis coactus (Lundbeck 1896)		MIC000313	Canada	Nunavut	Alexandra Fiord; Ellesmere Island	78.53	-75.55	27 Jul. 1982	O. Kukal		CNC
Microplitis coactus (Lundbeck 1896)		MIC000316	Canada	Nunavut	Ellesmere Island, Hazen Camp	81.8167	-71.3	8 Aug. 1963	R. Leech		CNC
Microplitis coactus (Lundbeck 1896)		ZMUC00023392	Greenland		Graedefjord Nugssuaq	63.35	-50.9833	4 Jul. 2003	Kissavik Exp., ZMUC		MZH
Microplitis coactus (Lundbeck 1896)		ZMUC00023393	Greenland		Buksefjorden, east	63.9167	-50.9167	6 Jul. 2003	Kissavik Exp., ZMUC		MZH
Microplitis coactus (Lundbeck 1896)		ZMUC00023394	Greenland		Graedefjord islet Nugssuaq	63.3667	-50.9333	5 Jul. 2003	Kissavik Exp., ZMUC		MZH
Microplitis Förster 1862	Microplitis sp. near lugubris, Microplitis jft04	CAM0580	Canada	Nunavut	Bylot Island; Camp 1, Humid	73.1572	-79.9495	15-31 Jul. 2007	L. Jolicoeur	yellow pan trap	CNC
Microplitis Förster 1862	Microplitis sp. near lugubris, Microplitis jft04	CAM0581	Canada	Nunavut	Bylot Island; Camp 1, Humid	73.1572	-79.9495	15-31 Jul. 2007	L. Jolicoeur	yellow pan trap	CNC
Microplitis Förster 1862	Microplitis sp. near lugubris, Microplitis jft04	CAM0582	Canada	Nunavut	Bylot Island	73.1572	-79.9495	15-31 Jul. 2007	L. Jolicoeur	yellow pan trap	CNC
Microplitis Förster 1862	Microplitis sp. near lugubris, Microplitis jft04	CAM0583	Canada	Nunavut	Bylot Island, Hutie Valley	73.1492	-79.9167	1-15 Jul. 2007	L. Jolicoeur	yellow pan trap	CNC
Microplitis Förster 1862	Microplitis sp. near lugubris, Microplitis jft04	CAM0584	Canada	Nunavut	Bylot Island, Hutie Valley	73.1492	-79.9167	1-15 Jul. 2007	L. Jolicoeur	yellow pan trap	CNC
Microplitis Förster 1862	Microplitis sp. near sofron	CAM0655	Canada	Northwest Territories	Victoria Island; Victoria Island	71.2833	-114	15 Jul. 1975	G & M. Wood		CNC
Microplitis Förster 1862	Microplitis sp. near sofron	CNC497608	Canada	Northwest Territories	Banks Island, Masik River	71.5333	-123.8				CNC
Microplitis Förster 1862	Microplitis sp. near sofron	CNC497609	Canada	Northwest Territories	Banks Island, Masik River	71.5333	-123.8				CNC
Microplitis Förster 1862	Microplitis sp. near sofron	CNC497610	Canada	Northwest Territories	Banks Island, Masik River	71.5333	-123.8				CNC
Microplitis Förster 1862	Microplitis sp. near sofron	CNC497611	Canada	Northwest Territories	Banks Island, Masik River	71.5333	-123.8				CNC
Microplitis Förster 1862	Microplitis sp. near sofron	CNC497612	Canada	Northwest Territories	Banks Island, Masik River	71.5333	-123.8				CNC
Microplitis Förster 1862	Microplitis sp. near sofron	CNC497613	Canada	Northwest Territories	Banks Island, Masik River	71.5333	-123.8				CNC
Microplitis Förster 1862	Microplitis sp. near sofron	CNC497614	Canada	Northwest Territories	Banks Island, Masik River	71.5333	-123.8				CNC
Microplitis Förster 1862	Microplitis sp. near sofron	CNC497615	Canada	Northwest Territories	Banks Island, Masik River	71.5333	-123.8				CNC
Microplitis Förster 1862	Microplitis sp. near sofron	CNC497616	Canada	Northwest Territories	Banks Island, Masik River	71.5333	-123.8				CNC
Microplitis Förster 1862	Microplitis sp. near sofron	CNC497617	Canada	Northwest Territories	Banks Island, Masik River	71.5333	-123.8				CNC
Microplitis Förster 1862	Microplitis sp. near sofron	CNC497618	Canada	Northwest Territories	Banks Island, Masik River	71.5333	-123.8				CNC
Microplitis lugubris (Ruthe 1860)		24290-A01	Greenland		Zackenberg	74.4667	-20.5667		M. Tiusanen & T. Roslin		MZH
Microplitis lugubris (Ruthe 1860)		24290-A03	Greenland		Zackenberg	74.4667	-20.5667		M. Tiusanen & T. Roslin		MZH
Microplitis lugubris (Ruthe 1860)		24290-A07	Greenland		Zackenberg	74.4667	-20.5667		M. Tiusanen & T. Roslin		MZH
Microplitis lugubris (Ruthe 1860)		24290-A08	Greenland		Zackenberg	74.4667	-20.5667		M. Tiusanen & T. Roslin		MZH
Microplitis lugubris (Ruthe 1860)		24290-A09	Greenland		Zackenberg	74.4667	-20.5667		M. Tiusanen & T. Roslin		MZH
Microplitis lugubris (Ruthe 1860)		24290-A10	Greenland		Zackenberg	74.4667	-20.5667		M. Tiusanen & T. Roslin		MZH
Microplitis lugubris (Ruthe 1860)		24290-A11	Greenland		Zackenberg	74.4667	-20.5667		M. Tiusanen & T. Roslin		MZH
Microplitis lugubris (Ruthe 1860)		24290-A12	Greenland		Zackenberg	74.4667	-20.5667		M. Tiusanen & T. Roslin		MZH
Microplitis lugubris (Ruthe 1860)		24290-B01	Greenland		Zackenberg	74.4667	-20.5667		M. Tiusanen & T. Roslin		MZH
Microplitis lugubris (Ruthe 1860)		24290-B03	Greenland		Zackenberg	74.4667	-20.5667		M. Tiusanen & T. Roslin		MZH
Microplitis lugubris (Ruthe 1860)		24290-B04	Greenland		Zackenberg	74.4667	-20.5667		M. Tiusanen & T. Roslin		MZH
Microplitis lugubris (Ruthe 1860)		24290-B05	Greenland		Zackenberg	74.4667	-20.5667		M. Tiusanen & T. Roslin		MZH
Microplitis lugubris (Ruthe 1860)		24290-B06	Greenland		Zackenberg	74.4667	-20.5667		M. Tiusanen & T. Roslin		MZH
Microplitis lugubris (Ruthe 1860)		24290-B07	Greenland		Zackenberg	74.4667	-20.5667		M. Tiusanen & T. Roslin		MZH
Microplitis lugubris (Ruthe 1860)		24290-B08	Greenland		Zackenberg	74.4667	-20.5667		M. Tiusanen & T. Roslin		MZH
Microplitis lugubris (Ruthe 1860)		24290-B09	Greenland		Zackenberg	74.4667	-20.5667		M. Tiusanen & T. Roslin		MZH
Microplitis lugubris (Ruthe 1860)		24290-C01	Greenland		Zackenberg	74.4667	-20.5667		M. Tiusanen & T. Roslin		MZH
Microplitis lugubris (Ruthe 1860)		24290-C02	Greenland		Zackenberg	74.4667	-20.5667		M. Tiusanen & T. Roslin		MZH
Microplitis lugubris (Ruthe 1860)		24290-C03	Greenland		Zackenberg	74.4667	-20.5667		M. Tiusanen & T. Roslin		MZH
Microplitis lugubris (Ruthe 1860)		24290-C04	Greenland		Zackenberg	74.4667	-20.5667		M. Tiusanen & T. Roslin		MZH
Microplitis lugubris (Ruthe 1860)		24290-C05	Greenland		Zackenberg	74.4667	-20.5667		M. Tiusanen & T. Roslin		MZH
Microplitis lugubris (Ruthe 1860)		24290-C07	Greenland		Zackenberg	74.4667	-20.5667		M. Tiusanen & T. Roslin		MZH
Microplitis lugubris (Ruthe 1860)		24290-C08	Greenland		Zackenberg	74.4667	-20.5667		M. Tiusanen & T. Roslin		MZH
Microplitis lugubris (Ruthe 1860)		24290-C09	Greenland		Zackenberg	74.4667	-20.5667		M. Tiusanen & T. Roslin		MZH
Microplitis lugubris (Ruthe 1860)		24290-C10	Greenland		Zackenberg	74.4667	-20.5667		M. Tiusanen & T. Roslin		MZH
Microplitis lugubris (Ruthe 1860)		24290-C11	Greenland		Zackenberg	74.4667	-20.5667		M. Tiusanen & T. Roslin		MZH
Microplitis lugubris (Ruthe 1860)		24290-C12	Greenland		Zackenberg	74.4667	-20.5667		M. Tiusanen & T. Roslin		MZH
Microplitis lugubris (Ruthe 1860)		24290-D01	Greenland		Zackenberg	74.4667	-20.5667		M. Tiusanen & T. Roslin		MZH
Microplitis lugubris (Ruthe 1860)		24290-D02	Greenland		Zackenberg	74.4667	-20.5667		M. Tiusanen & T. Roslin		MZH
Microplitis lugubris (Ruthe 1860)		24290-D04	Greenland		Zackenberg	74.4667	-20.5667		M. Tiusanen & T. Roslin		MZH
Microplitis lugubris (Ruthe 1860)		24290-D05	Greenland		Zackenberg	74.4667	-20.5667		M. Tiusanen & T. Roslin		MZH
Microplitis lugubris (Ruthe 1860)		24290-D06	Greenland		Zackenberg	74.4667	-20.5667		M. Tiusanen & T. Roslin		MZH
Microplitis lugubris (Ruthe 1860)		24290-D07	Greenland		Zackenberg	74.4667	-20.5667		M. Tiusanen & T. Roslin		MZH
Microplitis lugubris (Ruthe 1860)		24290-D11	Greenland		Zackenberg	74.4667	-20.5667		M. Tiusanen & T. Roslin		MZH
Microplitis lugubris (Ruthe 1860)		24290-D12	Greenland		Zackenberg	74.4667	-20.5667		M. Tiusanen & T. Roslin		MZH
Microplitis lugubris (Ruthe 1860)		24290-E03	Greenland		Zackenberg	74.4667	-20.5667		M. Tiusanen & T. Roslin		MZH
Microplitis lugubris (Ruthe 1860)		24290-E04	Greenland		Zackenberg	74.4667	-20.5667		M. Tiusanen & T. Roslin		MZH
Microplitis lugubris (Ruthe 1860)		24290-E05	Greenland		Zackenberg	74.4667	-20.5667		M. Tiusanen & T. Roslin		MZH
Microplitis lugubris (Ruthe 1860)		24290-E06	Greenland		Zackenberg	74.4667	-20.5667		M. Tiusanen & T. Roslin		MZH
Microplitis lugubris (Ruthe 1860)		24290-E07	Greenland		Zackenberg	74.4667	-20.5667		M. Tiusanen & T. Roslin		MZH
Microplitis lugubris (Ruthe 1860)		24290-E08	Greenland		Zackenberg	74.4667	-20.5667		M. Tiusanen & T. Roslin		MZH
Microplitis lugubris (Ruthe 1860)		24290-E09	Greenland		Zackenberg	74.4667	-20.5667		M. Tiusanen & T. Roslin		MZH
Microplitis lugubris (Ruthe 1860)		24290-E10	Greenland		Zackenberg	74.4667	-20.5667		M. Tiusanen & T. Roslin		MZH
Microplitis lugubris (Ruthe 1860)		24290-E11	Greenland		Zackenberg	74.4667	-20.5667		M. Tiusanen & T. Roslin		MZH
Microplitis lugubris (Ruthe 1860)		24290-E12	Greenland		Zackenberg	74.4667	-20.5667		M. Tiusanen & T. Roslin		MZH
Microplitis lugubris (Ruthe 1860)		24290-F01	Greenland		Zackenberg	74.4667	-20.5667		M. Tiusanen & T. Roslin		MZH
Microplitis lugubris (Ruthe 1860)		24290-F02	Greenland		Zackenberg	74.4667	-20.5667		M. Tiusanen & T. Roslin		MZH
Microplitis lugubris (Ruthe 1860)		24290-F03	Greenland		Zackenberg	74.4667	-20.5667		M. Tiusanen & T. Roslin		MZH
Microplitis lugubris (Ruthe 1860)		24290-F04	Greenland		Zackenberg	74.4667	-20.5667		M. Tiusanen & T. Roslin		MZH
Microplitis lugubris (Ruthe 1860)		24290-F05	Greenland		Zackenberg	74.4667	-20.5667		M. Tiusanen & T. Roslin		MZH
Microplitis lugubris (Ruthe 1860)		24290-F06	Greenland		Zackenberg	74.4667	-20.5667		M. Tiusanen & T. Roslin		MZH
Microplitis lugubris (Ruthe 1860)		24290-F07	Greenland		Zackenberg	74.4667	-20.5667		M. Tiusanen & T. Roslin		MZH
Microplitis lugubris (Ruthe 1860)		24290-F08	Greenland		Zackenberg	74.4667	-20.5667		M. Tiusanen & T. Roslin		MZH
Microplitis lugubris (Ruthe 1860)		24290-F09	Greenland		Zackenberg	74.4667	-20.5667		M. Tiusanen & T. Roslin		MZH
Microplitis lugubris (Ruthe 1860)		24290-F10	Greenland		Zackenberg	74.4667	-20.5667		M. Tiusanen & T. Roslin		MZH
Microplitis lugubris (Ruthe 1860)		24290-F11	Greenland		Zackenberg	74.4667	-20.5667		M. Tiusanen & T. Roslin		MZH
Microplitis lugubris (Ruthe 1860)		24290-F12	Greenland		Zackenberg	74.4667	-20.5667		M. Tiusanen & T. Roslin		MZH
Microplitis lugubris (Ruthe 1860)		24290-G01	Greenland		Zackenberg	74.4667	-20.5667		M. Tiusanen & T. Roslin		MZH
Microplitis lugubris (Ruthe 1860)		24290-G04	Greenland		Zackenberg	74.4667	-20.5667		M. Tiusanen & T. Roslin		MZH
Microplitis lugubris (Ruthe 1860)		24290-G05	Greenland		Zackenberg	74.4667	-20.5667		M. Tiusanen & T. Roslin		MZH
Microplitis lugubris (Ruthe 1860)		24290-G06	Greenland		Zackenberg	74.4667	-20.5667		M. Tiusanen & T. Roslin		MZH
Microplitis lugubris (Ruthe 1860)		24290-G07	Greenland		Zackenberg	74.4667	-20.5667		M. Tiusanen & T. Roslin		MZH
Microplitis lugubris (Ruthe 1860)		24290-G08	Greenland		Zackenberg	74.4667	-20.5667		M. Tiusanen & T. Roslin		MZH
Microplitis lugubris (Ruthe 1860)		24290-G09	Greenland		Zackenberg	74.4667	-20.5667		M. Tiusanen & T. Roslin		MZH
Microplitis lugubris (Ruthe 1860)		24290-G10	Greenland		Zackenberg	74.4667	-20.5667		M. Tiusanen & T. Roslin		MZH
Microplitis lugubris (Ruthe 1860)		24290-G11	Greenland		Zackenberg	74.4667	-20.5667		M. Tiusanen & T. Roslin		MZH
Microplitis lugubris (Ruthe 1860)		24290-G12	Greenland		Zackenberg	74.4667	-20.5667		M. Tiusanen & T. Roslin		MZH
Microplitis lugubris (Ruthe 1860)		24290-H01	Greenland		Zackenberg	74.4667	-20.5667		M. Tiusanen & T. Roslin		MZH
Microplitis lugubris (Ruthe 1860)		24290-H02	Greenland		Zackenberg	74.4667	-20.5667		M. Tiusanen & T. Roslin		MZH
Microplitis lugubris (Ruthe 1860)		24290-H05	Greenland		Zackenberg	74.4667	-20.5667		M. Tiusanen & T. Roslin		MZH
Microplitis lugubris (Ruthe 1860)		24290-H06	Greenland		Zackenberg	74.4667	-20.5667		M. Tiusanen & T. Roslin		MZH
Microplitis lugubris (Ruthe 1860)		24290-H08	Greenland		Zackenberg	74.4667	-20.5667		M. Tiusanen & T. Roslin		MZH
Microplitis lugubris (Ruthe 1860)		24290-H09	Greenland		Zackenberg	74.4667	-20.5667		M. Tiusanen & T. Roslin		MZH
Microplitis lugubris (Ruthe 1860)		24290-H10	Greenland		Zackenberg	74.4667	-20.5667		M. Tiusanen & T. Roslin		MZH
Microplitis lugubris (Ruthe 1860)		24290-H11	Greenland		Zackenberg	74.4667	-20.5667		M. Tiusanen & T. Roslin		MZH
Microplitis lugubris (Ruthe 1860)		24361-A02	Greenland		Zackenberg	74.4667	-20.5667		M. Tiusanen & T. Roslin		MZH
Microplitis lugubris (Ruthe 1860)		24361-A03	Greenland		Zackenberg	74.4667	-20.5667		M. Tiusanen & T. Roslin		MZH
Microplitis lugubris (Ruthe 1860)		24361-A04	Greenland		Zackenberg	74.4667	-20.5667		M. Tiusanen & T. Roslin		MZH
Microplitis lugubris (Ruthe 1860)		24361-A05	Greenland		Zackenberg	74.4667	-20.5667		M. Tiusanen & T. Roslin		MZH
Microplitis lugubris (Ruthe 1860)		24361-A07	Greenland		Zackenberg	74.4667	-20.5667		M. Tiusanen & T. Roslin		MZH
Microplitis lugubris (Ruthe 1860)		24361-A08	Greenland		Zackenberg	74.4667	-20.5667		M. Tiusanen & T. Roslin		MZH
Microplitis lugubris (Ruthe 1860)		24361-A09	Greenland		Zackenberg	74.4667	-20.5667		M. Tiusanen & T. Roslin		MZH
Microplitis lugubris (Ruthe 1860)		24361-B01	Greenland		Zackenberg	74.4667	-20.5667		M. Tiusanen & T. Roslin		MZH
Microplitis lugubris (Ruthe 1860)		24361-B03	Greenland		Zackenberg	74.4667	-20.5667		M. Tiusanen & T. Roslin		MZH
Microplitis lugubris (Ruthe 1860)		24361-B05	Greenland		Zackenberg	74.4667	-20.5667		M. Tiusanen & T. Roslin		MZH
Microplitis lugubris (Ruthe 1860)		24361-B06	Greenland		Zackenberg	74.4667	-20.5667		M. Tiusanen & T. Roslin		MZH
Microplitis lugubris (Ruthe 1860)		24361-B07	Greenland		Zackenberg	74.4667	-20.5667		M. Tiusanen & T. Roslin		MZH
Microplitis lugubris (Ruthe 1860)		24361-B08	Greenland		Zackenberg	74.4667	-20.5667		M. Tiusanen & T. Roslin		MZH
Microplitis lugubris (Ruthe 1860)		24361-C01	Greenland		Zackenberg	74.4667	-20.5667		M. Tiusanen & T. Roslin		MZH
Microplitis lugubris (Ruthe 1860)		24361-C02	Greenland		Zackenberg	74.4667	-20.5667		M. Tiusanen & T. Roslin		MZH
Microplitis lugubris (Ruthe 1860)		24361-C03	Greenland		Zackenberg	74.4667	-20.5667		M. Tiusanen & T. Roslin		MZH
Microplitis lugubris (Ruthe 1860)		24361-C06	Greenland		Zackenberg	74.4667	-20.5667		M. Tiusanen & T. Roslin		MZH
Microplitis lugubris (Ruthe 1860)		24361-C07	Greenland		Zackenberg	74.4667	-20.5667		M. Tiusanen & T. Roslin		MZH
Microplitis lugubris (Ruthe 1860)		24361-C08	Greenland		Zackenberg	74.4667	-20.5667		M. Tiusanen & T. Roslin		MZH
Microplitis lugubris (Ruthe 1860)		24361-C10	Greenland		Zackenberg	74.4667	-20.5667		M. Tiusanen & T. Roslin		MZH
Microplitis lugubris (Ruthe 1860)		24361-C11	Greenland		Zackenberg	74.4667	-20.5667		M. Tiusanen & T. Roslin		MZH
Microplitis lugubris (Ruthe 1860)		24361-C12	Greenland		Zackenberg	74.4667	-20.5667		M. Tiusanen & T. Roslin		MZH
Microplitis lugubris (Ruthe 1860)		24361-D01	Greenland		Zackenberg	74.4667	-20.5667		M. Tiusanen & T. Roslin		MZH
Microplitis lugubris (Ruthe 1860)		24361-D02	Greenland		Zackenberg	74.4667	-20.5667		M. Tiusanen & T. Roslin		MZH
Microplitis lugubris (Ruthe 1860)		24361-D03	Greenland		Zackenberg	74.4667	-20.5667		M. Tiusanen & T. Roslin		MZH
Microplitis lugubris (Ruthe 1860)		24361-D05	Greenland		Zackenberg	74.4667	-20.5667		M. Tiusanen & T. Roslin		MZH
Microplitis lugubris (Ruthe 1860)		24361-D06	Greenland		Zackenberg	74.4667	-20.5667		M. Tiusanen & T. Roslin		MZH
Microplitis lugubris (Ruthe 1860)		24361-D09	Greenland		Zackenberg	74.4667	-20.5667		M. Tiusanen & T. Roslin		MZH
Microplitis lugubris (Ruthe 1860)		24361-D10	Greenland		Zackenberg	74.4667	-20.5667		M. Tiusanen & T. Roslin		MZH
Microplitis lugubris (Ruthe 1860)		24361-D11	Greenland		Zackenberg	74.4667	-20.5667		M. Tiusanen & T. Roslin		MZH
Microplitis lugubris (Ruthe 1860)		24361-D12	Greenland		Zackenberg	74.4667	-20.5667		M. Tiusanen & T. Roslin		MZH
Microplitis lugubris (Ruthe 1860)		24361-E01	Greenland		Zackenberg	74.4667	-20.5667		M. Tiusanen & T. Roslin		MZH
Microplitis lugubris (Ruthe 1860)		24361-E02	Greenland		Zackenberg	74.4667	-20.5667		M. Tiusanen & T. Roslin		MZH
Microplitis lugubris (Ruthe 1860)		24361-E03	Greenland		Zackenberg	74.4667	-20.5667		M. Tiusanen & T. Roslin		MZH
Microplitis lugubris (Ruthe 1860)		24361-E04	Greenland		Zackenberg	74.4667	-20.5667		M. Tiusanen & T. Roslin		MZH
Microplitis lugubris (Ruthe 1860)		24361-E05	Greenland		Zackenberg	74.4667	-20.5667		M. Tiusanen & T. Roslin		MZH
Microplitis lugubris (Ruthe 1860)		24361-E06	Greenland		Zackenberg	74.4667	-20.5667		M. Tiusanen & T. Roslin		MZH
Microplitis lugubris (Ruthe 1860)		24361-E08	Greenland		Zackenberg	74.4667	-20.5667		M. Tiusanen & T. Roslin		MZH
Microplitis lugubris (Ruthe 1860)		24361-E09	Greenland		Zackenberg	74.4667	-20.5667		M. Tiusanen & T. Roslin		MZH
Microplitis lugubris (Ruthe 1860)		24361-E10	Greenland		Zackenberg	74.4667	-20.5667		M. Tiusanen & T. Roslin		MZH
Microplitis lugubris (Ruthe 1860)		24361-E11	Greenland		Zackenberg	74.4667	-20.5667		M. Tiusanen & T. Roslin		MZH
Microplitis lugubris (Ruthe 1860)		24361-E12	Greenland		Zackenberg	74.4667	-20.5667		M. Tiusanen & T. Roslin		MZH
Microplitis lugubris (Ruthe 1860)		24361-F01	Greenland		Zackenberg	74.4667	-20.5667		M. Tiusanen & T. Roslin		MZH
Microplitis lugubris (Ruthe 1860)		24361-F02	Greenland		Zackenberg	74.4667	-20.5667		M. Tiusanen & T. Roslin		MZH
Microplitis lugubris (Ruthe 1860)		24361-F03	Greenland		Zackenberg	74.4667	-20.5667		M. Tiusanen & T. Roslin		MZH
Microplitis lugubris (Ruthe 1860)		24361-F04	Greenland		Zackenberg	74.4667	-20.5667		M. Tiusanen & T. Roslin		MZH
Microplitis lugubris (Ruthe 1860)		24361-F05	Greenland		Zackenberg	74.4667	-20.5667		M. Tiusanen & T. Roslin		MZH
Microplitis lugubris (Ruthe 1860)		24361-F06	Greenland		Zackenberg	74.4667	-20.5667		M. Tiusanen & T. Roslin		MZH
Microplitis lugubris (Ruthe 1860)		24361-F07	Greenland		Zackenberg	74.4667	-20.5667		M. Tiusanen & T. Roslin		MZH
Microplitis lugubris (Ruthe 1860)		24361-F08	Greenland		Zackenberg	74.4667	-20.5667		M. Tiusanen & T. Roslin		MZH
Microplitis lugubris (Ruthe 1860)		24361-F09	Greenland		Zackenberg	74.4667	-20.5667		M. Tiusanen & T. Roslin		MZH
Microplitis lugubris (Ruthe 1860)		24361-F10	Greenland		Zackenberg	74.4667	-20.5667		M. Tiusanen & T. Roslin		MZH
Microplitis lugubris (Ruthe 1860)		24361-F11	Greenland		Zackenberg	74.4667	-20.5667		M. Tiusanen & T. Roslin		MZH
Microplitis lugubris (Ruthe 1860)		24361-F12	Greenland		Zackenberg	74.4667	-20.5667		M. Tiusanen & T. Roslin		MZH
Microplitis lugubris (Ruthe 1860)		24361-G01	Greenland		Zackenberg	74.4667	-20.5667		M. Tiusanen & T. Roslin		MZH
Microplitis lugubris (Ruthe 1860)		24361-G05	Greenland		Zackenberg	74.4667	-20.5667		M. Tiusanen & T. Roslin		MZH
Microplitis lugubris (Ruthe 1860)		24361-G06	Greenland		Zackenberg	74.4667	-20.5667		M. Tiusanen & T. Roslin		MZH
Microplitis lugubris (Ruthe 1860)		24361-G07	Greenland		Zackenberg	74.4667	-20.5667		M. Tiusanen & T. Roslin		MZH
Microplitis lugubris (Ruthe 1860)		24361-G08	Greenland		Zackenberg	74.4667	-20.5667		M. Tiusanen & T. Roslin		MZH
Microplitis lugubris (Ruthe 1860)		24361-G10	Greenland		Zackenberg	74.4667	-20.5667		M. Tiusanen & T. Roslin		MZH
Microplitis lugubris (Ruthe 1860)		24361-H01	Greenland		Zackenberg	74.4667	-20.5667		M. Tiusanen & T. Roslin		MZH
Microplitis lugubris (Ruthe 1860)		24361-H02	Greenland		Zackenberg	74.4667	-20.5667		M. Tiusanen & T. Roslin		MZH
Microplitis lugubris (Ruthe 1860)		24361-H03	Greenland		Zackenberg	74.4667	-20.5667		M. Tiusanen & T. Roslin		MZH
Microplitis lugubris (Ruthe 1860)		24361-H05	Greenland		Zackenberg	74.4667	-20.5667		M. Tiusanen & T. Roslin		MZH
Microplitis lugubris (Ruthe 1860)		24361-H06	Greenland		Zackenberg	74.4667	-20.5667		M. Tiusanen & T. Roslin		MZH
Microplitis lugubris (Ruthe 1860)		24361-H07	Greenland		Zackenberg	74.4667	-20.5667		M. Tiusanen & T. Roslin		MZH
Microplitis lugubris (Ruthe 1860)		24361-H08	Greenland		Zackenberg	74.4667	-20.5667		M. Tiusanen & T. Roslin		MZH
Microplitis lugubris (Ruthe 1860)		24361-H09	Greenland		Zackenberg	74.4667	-20.5667		M. Tiusanen & T. Roslin		MZH
Microplitis lugubris (Ruthe 1860)		24361-H10	Greenland		Zackenberg	74.4667	-20.5667		M. Tiusanen & T. Roslin		MZH
Microplitis lugubris (Ruthe 1860)		24361-H11	Greenland		Zackenberg	74.4667	-20.5667		M. Tiusanen & T. Roslin		MZH
Microplitis lugubris (Ruthe 1860)		24363-A01	Greenland		Zackenberg	74.4667	-20.5667		M. Tiusanen & T. Roslin		MZH
Microplitis lugubris (Ruthe 1860)		24363-A02	Greenland		Zackenberg	74.4667	-20.5667		M. Tiusanen & T. Roslin		MZH
Microplitis lugubris (Ruthe 1860)		24363-A03	Greenland		Zackenberg	74.4667	-20.5667		M. Tiusanen & T. Roslin		MZH
Microplitis lugubris (Ruthe 1860)		24363-A04	Greenland		Zackenberg	74.4667	-20.5667		M. Tiusanen & T. Roslin		MZH
Microplitis lugubris (Ruthe 1860)		24363-A05	Greenland		Zackenberg	74.4667	-20.5667		M. Tiusanen & T. Roslin		MZH
Microplitis lugubris (Ruthe 1860)		24363-A06	Greenland		Zackenberg	74.4667	-20.5667		M. Tiusanen & T. Roslin		MZH
Microplitis lugubris (Ruthe 1860)		24363-A07	Greenland		Zackenberg	74.4667	-20.5667		M. Tiusanen & T. Roslin		MZH
Microplitis lugubris (Ruthe 1860)		24363-A08	Greenland		Zackenberg	74.4667	-20.5667		M. Tiusanen & T. Roslin		MZH
Microplitis lugubris (Ruthe 1860)		24363-A09	Greenland		Zackenberg	74.4667	-20.5667		M. Tiusanen & T. Roslin		MZH
Microplitis lugubris (Ruthe 1860)		24363-A10	Greenland		Zackenberg	74.4667	-20.5667		M. Tiusanen & T. Roslin		MZH
Microplitis lugubris (Ruthe 1860)		24363-A11	Greenland		Zackenberg	74.4667	-20.5667		M. Tiusanen & T. Roslin		MZH
Microplitis lugubris (Ruthe 1860)		24363-A12	Greenland		Zackenberg	74.4667	-20.5667		M. Tiusanen & T. Roslin		MZH
Microplitis lugubris (Ruthe 1860)		24363-B02	Greenland		Zackenberg	74.4667	-20.5667		M. Tiusanen & T. Roslin		MZH
Microplitis lugubris (Ruthe 1860)		24363-B03	Greenland		Zackenberg	74.4667	-20.5667		M. Tiusanen & T. Roslin		MZH
Microplitis lugubris (Ruthe 1860)		24363-B04	Greenland		Zackenberg	74.4667	-20.5667		M. Tiusanen & T. Roslin		MZH
Microplitis lugubris (Ruthe 1860)		24363-B06	Greenland		Zackenberg	74.4667	-20.5667		M. Tiusanen & T. Roslin		MZH
Microplitis lugubris (Ruthe 1860)		24363-B07	Greenland		Zackenberg	74.4667	-20.5667		M. Tiusanen & T. Roslin		MZH
Microplitis lugubris (Ruthe 1860)		24363-B08	Greenland		Zackenberg	74.4667	-20.5667		M. Tiusanen & T. Roslin		MZH
Microplitis lugubris (Ruthe 1860)		24363-B10	Greenland		Zackenberg	74.4667	-20.5667		M. Tiusanen & T. Roslin		MZH
Microplitis lugubris (Ruthe 1860)		24363-B11	Greenland		Zackenberg	74.4667	-20.5667		M. Tiusanen & T. Roslin		MZH
Microplitis lugubris (Ruthe 1860)		24363-B12	Greenland		Zackenberg	74.4667	-20.5667		M. Tiusanen & T. Roslin		MZH
Microplitis lugubris (Ruthe 1860)		24363-C01	Greenland		Zackenberg	74.4667	-20.5667		M. Tiusanen & T. Roslin		MZH
Microplitis lugubris (Ruthe 1860)		24363-C02	Greenland		Zackenberg	74.4667	-20.5667		M. Tiusanen & T. Roslin		MZH
Microplitis lugubris (Ruthe 1860)		24363-C03	Greenland		Zackenberg	74.4667	-20.5667		M. Tiusanen & T. Roslin		MZH
Microplitis lugubris (Ruthe 1860)		24363-C05	Greenland		Zackenberg	74.4667	-20.5667		M. Tiusanen & T. Roslin		MZH
Microplitis lugubris (Ruthe 1860)		24363-C07	Greenland		Zackenberg	74.4667	-20.5667		M. Tiusanen & T. Roslin		MZH
Microplitis lugubris (Ruthe 1860)		24363-C08	Greenland		Zackenberg	74.4667	-20.5667		M. Tiusanen & T. Roslin		MZH
Microplitis lugubris (Ruthe 1860)		24363-C09	Greenland		Zackenberg	74.4667	-20.5667		M. Tiusanen & T. Roslin		MZH
Microplitis lugubris (Ruthe 1860)		24363-C10	Greenland		Zackenberg	74.4667	-20.5667		M. Tiusanen & T. Roslin		MZH
Microplitis lugubris (Ruthe 1860)		24363-C11	Greenland		Zackenberg	74.4667	-20.5667		M. Tiusanen & T. Roslin		MZH
Microplitis lugubris (Ruthe 1860)		24363-C12	Greenland		Zackenberg	74.4667	-20.5667		M. Tiusanen & T. Roslin		MZH
Microplitis lugubris (Ruthe 1860)		24363-D03	Greenland		Zackenberg	74.4667	-20.5667		M. Tiusanen & T. Roslin		MZH
Microplitis lugubris (Ruthe 1860)		24363-D05	Greenland		Zackenberg	74.4667	-20.5667		M. Tiusanen & T. Roslin		MZH
Microplitis lugubris (Ruthe 1860)		24363-D06	Greenland		Zackenberg	74.4667	-20.5667		M. Tiusanen & T. Roslin		MZH
Microplitis lugubris (Ruthe 1860)		24363-D07	Greenland		Zackenberg	74.4667	-20.5667		M. Tiusanen & T. Roslin		MZH
Microplitis lugubris (Ruthe 1860)		24363-D08	Greenland		Zackenberg	74.4667	-20.5667		M. Tiusanen & T. Roslin		MZH
Microplitis lugubris (Ruthe 1860)		24363-D10	Greenland		Zackenberg	74.4667	-20.5667		M. Tiusanen & T. Roslin		MZH
Microplitis lugubris (Ruthe 1860)		24363-D11	Greenland		Zackenberg	74.4667	-20.5667		M. Tiusanen & T. Roslin		MZH
Microplitis lugubris (Ruthe 1860)		24363-D12	Greenland		Zackenberg	74.4667	-20.5667		M. Tiusanen & T. Roslin		MZH
Microplitis lugubris (Ruthe 1860)		24363-E01	Greenland		Zackenberg	74.4667	-20.5667		M. Tiusanen & T. Roslin		MZH
Microplitis lugubris (Ruthe 1860)		24363-E02	Greenland		Zackenberg	74.4667	-20.5667		M. Tiusanen & T. Roslin		MZH
Microplitis lugubris (Ruthe 1860)		24363-E03	Greenland		Zackenberg	74.4667	-20.5667		M. Tiusanen & T. Roslin		MZH
Microplitis lugubris (Ruthe 1860)		24363-E05	Greenland		Zackenberg	74.4667	-20.5667		M. Tiusanen & T. Roslin		MZH
Microplitis lugubris (Ruthe 1860)		24363-E06	Greenland		Zackenberg	74.4667	-20.5667		M. Tiusanen & T. Roslin		MZH
Microplitis lugubris (Ruthe 1860)		24363-E07	Greenland		Zackenberg	74.4667	-20.5667		M. Tiusanen & T. Roslin		MZH
Microplitis lugubris (Ruthe 1860)		24363-F02	Greenland		Zackenberg	74.4667	-20.5667		M. Tiusanen & T. Roslin		MZH
Microplitis lugubris (Ruthe 1860)		24363-F04	Greenland		Zackenberg	74.4667	-20.5667		M. Tiusanen & T. Roslin		MZH
Microplitis lugubris (Ruthe 1860)		24363-F06	Greenland		Zackenberg	74.4667	-20.5667		M. Tiusanen & T. Roslin		MZH
Microplitis lugubris (Ruthe 1860)		24363-F07	Greenland		Zackenberg	74.4667	-20.5667		M. Tiusanen & T. Roslin		MZH
Microplitis lugubris (Ruthe 1860)		24363-F09	Greenland		Zackenberg	74.4667	-20.5667		M. Tiusanen & T. Roslin		MZH
Microplitis lugubris (Ruthe 1860)		24363-F10	Greenland		Zackenberg	74.4667	-20.5667		M. Tiusanen & T. Roslin		MZH
Microplitis lugubris (Ruthe 1860)		24363-F11	Greenland		Zackenberg	74.4667	-20.5667		M. Tiusanen & T. Roslin		MZH
Microplitis lugubris (Ruthe 1860)		24363-F12	Greenland		Zackenberg	74.4667	-20.5667		M. Tiusanen & T. Roslin		MZH
Microplitis lugubris (Ruthe 1860)		24363-G01	Greenland		Zackenberg	74.4667	-20.5667		M. Tiusanen & T. Roslin		MZH
Microplitis lugubris (Ruthe 1860)		24363-G04	Greenland		Zackenberg	74.4667	-20.5667		M. Tiusanen & T. Roslin		MZH
Microplitis lugubris (Ruthe 1860)		24363-G05	Greenland		Zackenberg	74.4667	-20.5667		M. Tiusanen & T. Roslin		MZH
Microplitis lugubris (Ruthe 1860)		24363-G06	Greenland		Zackenberg	74.4667	-20.5667		M. Tiusanen & T. Roslin		MZH
Microplitis lugubris (Ruthe 1860)		24363-G07	Greenland		Zackenberg	74.4667	-20.5667		M. Tiusanen & T. Roslin		MZH
Microplitis lugubris (Ruthe 1860)		24363-G09	Greenland		Zackenberg	74.4667	-20.5667		M. Tiusanen & T. Roslin		MZH
Microplitis lugubris (Ruthe 1860)		24363-G12	Greenland		Zackenberg	74.4667	-20.5667		M. Tiusanen & T. Roslin		MZH
Microplitis lugubris (Ruthe 1860)		24363-H02	Greenland		Zackenberg	74.4667	-20.5667		M. Tiusanen & T. Roslin		MZH
Microplitis lugubris (Ruthe 1860)		24363-H03	Greenland		Zackenberg	74.4667	-20.5667		M. Tiusanen & T. Roslin		MZH
Microplitis lugubris (Ruthe 1860)		24363-H08	Greenland		Zackenberg	74.4667	-20.5667		M. Tiusanen & T. Roslin		MZH
Microplitis lugubris (Ruthe 1860)		24363-H09	Greenland		Zackenberg	74.4667	-20.5667		M. Tiusanen & T. Roslin		MZH
Microplitis lugubris (Ruthe 1860)		24363-H10	Greenland		Zackenberg	74.4667	-20.5667		M. Tiusanen & T. Roslin		MZH
Microplitis lugubris (Ruthe 1860)		24363-H11	Greenland		Zackenberg	74.4667	-20.5667		M. Tiusanen & T. Roslin		MZH
Microplitis lugubris (Ruthe 1860)		24364-D07	Greenland		Zackenberg	74.4667	-20.5667		M. Tiusanen & T. Roslin		MZH
Microplitis lugubris (Ruthe 1860)		24387-F01	Greenland		Zackenberg	74.4667	-20.5667		M. Tiusanen & T. Roslin		MZH
Microplitis lugubris (Ruthe 1860)		24388-A02	Greenland		Zackenberg	74.4667	-20.5667		M. Tiusanen & T. Roslin		MZH
Microplitis lugubris (Ruthe 1860)		24388-A04	Greenland		Zackenberg	74.4667	-20.5667		M. Tiusanen & T. Roslin		MZH
Microplitis lugubris (Ruthe 1860)		24388-A06	Greenland		Zackenberg	74.4667	-20.5667		M. Tiusanen & T. Roslin		MZH
Microplitis lugubris (Ruthe 1860)		24388-A07	Greenland		Zackenberg	74.4667	-20.5667		M. Tiusanen & T. Roslin		MZH
Microplitis lugubris (Ruthe 1860)		24388-A11	Greenland		Zackenberg	74.4667	-20.5667		M. Tiusanen & T. Roslin		MZH
Microplitis lugubris (Ruthe 1860)		24388-B05	Greenland		Zackenberg	74.4667	-20.5667		M. Tiusanen & T. Roslin		MZH
Microplitis lugubris (Ruthe 1860)		24388-B08	Greenland		Zackenberg	74.4667	-20.5667		M. Tiusanen & T. Roslin		MZH
Microplitis lugubris (Ruthe 1860)		24388-B09	Greenland		Zackenberg	74.4667	-20.5667		M. Tiusanen & T. Roslin		MZH
Microplitis lugubris (Ruthe 1860)		24388-C02	Greenland		Zackenberg	74.4667	-20.5667		M. Tiusanen & T. Roslin		MZH
Microplitis lugubris (Ruthe 1860)		24388-C03	Greenland		Zackenberg	74.4667	-20.5667		M. Tiusanen & T. Roslin		MZH
Microplitis lugubris (Ruthe 1860)		24388-C04	Greenland		Zackenberg	74.4667	-20.5667		M. Tiusanen & T. Roslin		MZH
Microplitis lugubris (Ruthe 1860)		24388-C05	Greenland		Zackenberg	74.4667	-20.5667		M. Tiusanen & T. Roslin		MZH
Microplitis lugubris (Ruthe 1860)		24388-C06	Greenland		Zackenberg	74.4667	-20.5667		M. Tiusanen & T. Roslin		MZH
Microplitis lugubris (Ruthe 1860)		24388-C07	Greenland		Zackenberg	74.4667	-20.5667		M. Tiusanen & T. Roslin		MZH
Microplitis lugubris (Ruthe 1860)		24388-C08	Greenland		Zackenberg	74.4667	-20.5667		M. Tiusanen & T. Roslin		MZH
Microplitis lugubris (Ruthe 1860)		24388-C09	Greenland		Zackenberg	74.4667	-20.5667		M. Tiusanen & T. Roslin		MZH
Microplitis lugubris (Ruthe 1860)		24388-C10	Greenland		Zackenberg	74.4667	-20.5667		M. Tiusanen & T. Roslin		MZH
Microplitis lugubris (Ruthe 1860)		24388-C12	Greenland		Zackenberg	74.4667	-20.5667		M. Tiusanen & T. Roslin		MZH
Microplitis lugubris (Ruthe 1860)		24388-D01	Greenland		Zackenberg	74.4667	-20.5667		M. Tiusanen & T. Roslin		MZH
Microplitis lugubris (Ruthe 1860)		24388-D03	Greenland		Zackenberg	74.4667	-20.5667		M. Tiusanen & T. Roslin		MZH
Microplitis lugubris (Ruthe 1860)		24388-D07	Greenland		Zackenberg	74.4667	-20.5667		M. Tiusanen & T. Roslin		MZH
Microplitis lugubris (Ruthe 1860)		24388-D08	Greenland		Zackenberg	74.4667	-20.5667		M. Tiusanen & T. Roslin		MZH
Microplitis lugubris (Ruthe 1860)		24388-D09	Greenland		Zackenberg	74.4667	-20.5667		M. Tiusanen & T. Roslin		MZH
Microplitis lugubris (Ruthe 1860)		24388-D10	Greenland		Zackenberg	74.4667	-20.5667		M. Tiusanen & T. Roslin		MZH
Microplitis lugubris (Ruthe 1860)		24388-D11	Greenland		Zackenberg	74.4667	-20.5667		M. Tiusanen & T. Roslin		MZH
Microplitis lugubris (Ruthe 1860)		24388-D12	Greenland		Zackenberg	74.4667	-20.5667		M. Tiusanen & T. Roslin		MZH
Microplitis lugubris (Ruthe 1860)		24388-E01	Greenland		Zackenberg	74.4667	-20.5667		M. Tiusanen & T. Roslin		MZH
Microplitis lugubris (Ruthe 1860)		24389-B03	Greenland		Zackenberg	74.4667	-20.5667		M. Tiusanen & T. Roslin		MZH
Microplitis lugubris (Ruthe 1860)		24389-B04	Greenland		Zackenberg	74.4667	-20.5667		M. Tiusanen & T. Roslin		MZH
Microplitis lugubris (Ruthe 1860)		24389-C02	Greenland		Zackenberg	74.4667	-20.5667		M. Tiusanen & T. Roslin		MZH
Microplitis lugubris (Ruthe 1860)		24389-E03	Greenland		Zackenberg	74.4667	-20.5667		M. Tiusanen & T. Roslin		MZH
Microplitis lugubris (Ruthe 1860)		24391-E02	Greenland		Zackenberg	74.4667	-20.5667		M. Tiusanen & T. Roslin		MZH
Microplitis lugubris (Ruthe 1860)		24392-D06	Greenland		Zackenberg	74.4667	-20.5667		M. Tiusanen & T. Roslin		MZH
Microplitis lugubris (Ruthe 1860)		24392-F07	Greenland		Zackenberg	74.4667	-20.5667		M. Tiusanen & T. Roslin		MZH
Microplitis lugubris (Ruthe 1860)		24392-F09	Greenland		Zackenberg	74.4667	-20.5667		M. Tiusanen & T. Roslin		MZH
Microplitis lugubris (Ruthe 1860)		24392-G01	Greenland		Zackenberg	74.4667	-20.5667		M. Tiusanen & T. Roslin		MZH
Microplitis lugubris (Ruthe 1860)		24392-G06	Greenland		Zackenberg	74.4667	-20.5667		M. Tiusanen & T. Roslin		MZH
Microplitis lugubris (Ruthe 1860)		24392-G10	Greenland		Zackenberg	74.4667	-20.5667		M. Tiusanen & T. Roslin		MZH
Microplitis lugubris (Ruthe 1860)		24392-G12	Greenland		Zackenberg	74.4667	-20.5667		M. Tiusanen & T. Roslin		MZH
Microplitis lugubris (Ruthe 1860)		24402-A01	Greenland		Zackenberg	74.4667	-20.5667		M. Tiusanen & T. Roslin		MZH
Microplitis lugubris (Ruthe 1860)		24402-A02	Greenland		Zackenberg	74.4667	-20.5667		M. Tiusanen & T. Roslin		MZH
Microplitis lugubris (Ruthe 1860)		24402-A09	Greenland		Zackenberg	74.4667	-20.5667		M. Tiusanen & T. Roslin		MZH
Microplitis lugubris (Ruthe 1860)		24402-A10	Greenland		Zackenberg	74.4667	-20.5667		M. Tiusanen & T. Roslin		MZH
Microplitis lugubris (Ruthe 1860)		24402-C04	Greenland		Zackenberg	74.4667	-20.5667		M. Tiusanen & T. Roslin		MZH
Microplitis lugubris (Ruthe 1860)		24402-C07	Greenland		Zackenberg	74.4667	-20.5667		M. Tiusanen & T. Roslin		MZH
Microplitis lugubris (Ruthe 1860)		24402-C12	Greenland		Zackenberg	74.4667	-20.5667		M. Tiusanen & T. Roslin		MZH
Microplitis lugubris (Ruthe 1860)		24402-D03	Greenland		Zackenberg	74.4667	-20.5667		M. Tiusanen & T. Roslin		MZH
Microplitis lugubris (Ruthe 1860)		24402-D06	Greenland		Zackenberg	74.4667	-20.5667		M. Tiusanen & T. Roslin		MZH
Microplitis lugubris (Ruthe 1860)		24402-D07	Greenland		Zackenberg	74.4667	-20.5667		M. Tiusanen & T. Roslin		MZH
Microplitis lugubris (Ruthe 1860)		24402-D10	Greenland		Zackenberg	74.4667	-20.5667		M. Tiusanen & T. Roslin		MZH
Microplitis lugubris (Ruthe 1860)		24402-D12	Greenland		Zackenberg	74.4667	-20.5667		M. Tiusanen & T. Roslin		MZH
Microplitis lugubris (Ruthe 1860)		24409-D06	Greenland		Zackenberg	74.4667	-20.5667		M. Tiusanen & T. Roslin		MZH
Microplitis lugubris (Ruthe 1860)		24409-E10	Greenland		Zackenberg	74.4667	-20.5667		M. Tiusanen & T. Roslin		MZH
Microplitis lugubris (Ruthe 1860)		24409-G07	Greenland		Zackenberg	74.4667	-20.5667		M. Tiusanen & T. Roslin		MZH
Microplitis lugubris (Ruthe 1860)		24411-F11	Greenland		Zackenberg	74.4667	-20.5667		M. Tiusanen & T. Roslin		MZH
Microplitis lugubris (Ruthe 1860)		24412-A06	Greenland		Zackenberg	74.4667	-20.5667		M. Tiusanen & T. Roslin		MZH
Microplitis lugubris (Ruthe 1860)		24412-A10	Greenland		Zackenberg	74.4667	-20.5667		M. Tiusanen & T. Roslin		MZH
Microplitis lugubris (Ruthe 1860)		24412-B02	Greenland		Zackenberg	74.4667	-20.5667		M. Tiusanen & T. Roslin		MZH
Microplitis lugubris (Ruthe 1860)		24412-B03	Greenland		Zackenberg	74.4667	-20.5667		M. Tiusanen & T. Roslin		MZH
Microplitis lugubris (Ruthe 1860)		24412-B05	Greenland		Zackenberg	74.4667	-20.5667		M. Tiusanen & T. Roslin		MZH
Microplitis lugubris (Ruthe 1860)		24412-B06	Greenland		Zackenberg	74.4667	-20.5667		M. Tiusanen & T. Roslin		MZH
Microplitis lugubris (Ruthe 1860)		24412-B07	Greenland		Zackenberg	74.4667	-20.5667		M. Tiusanen & T. Roslin		MZH
Microplitis lugubris (Ruthe 1860)		24412-B08	Greenland		Zackenberg	74.4667	-20.5667		M. Tiusanen & T. Roslin		MZH
Microplitis lugubris (Ruthe 1860)		24412-B09	Greenland		Zackenberg	74.4667	-20.5667		M. Tiusanen & T. Roslin		MZH
Microplitis lugubris (Ruthe 1860)		24412-B10	Greenland		Zackenberg	74.4667	-20.5667		M. Tiusanen & T. Roslin		MZH
Microplitis lugubris (Ruthe 1860)		24412-B11	Greenland		Zackenberg	74.4667	-20.5667		M. Tiusanen & T. Roslin		MZH
Microplitis lugubris (Ruthe 1860)		24412-B12	Greenland		Zackenberg	74.4667	-20.5667		M. Tiusanen & T. Roslin		MZH
Microplitis lugubris (Ruthe 1860)		24412-C02	Greenland		Zackenberg	74.4667	-20.5667		M. Tiusanen & T. Roslin		MZH
Microplitis lugubris (Ruthe 1860)		24412-C11	Greenland		Zackenberg	74.4667	-20.5667		M. Tiusanen & T. Roslin		MZH
Microplitis lugubris (Ruthe 1860)		24412-D02	Greenland		Zackenberg	74.4667	-20.5667		M. Tiusanen & T. Roslin		MZH
Microplitis lugubris (Ruthe 1860)		24412-D03	Greenland		Zackenberg	74.4667	-20.5667		M. Tiusanen & T. Roslin		MZH
Microplitis lugubris (Ruthe 1860)		24412-D07	Greenland		Zackenberg	74.4667	-20.5667		M. Tiusanen & T. Roslin		MZH
Microplitis lugubris (Ruthe 1860)		24412-D09	Greenland		Zackenberg	74.4667	-20.5667		M. Tiusanen & T. Roslin		MZH
Microplitis lugubris (Ruthe 1860)		24412-D10	Greenland		Zackenberg	74.4667	-20.5667		M. Tiusanen & T. Roslin		MZH
Microplitis lugubris (Ruthe 1860)		24412-D12	Greenland		Zackenberg	74.4667	-20.5667		M. Tiusanen & T. Roslin		MZH
Microplitis lugubris (Ruthe 1860)		24412-E02	Greenland		Zackenberg	74.4667	-20.5667		M. Tiusanen & T. Roslin		MZH
Microplitis lugubris (Ruthe 1860)		24412-E03	Greenland		Zackenberg	74.4667	-20.5667		M. Tiusanen & T. Roslin		MZH
Microplitis lugubris (Ruthe 1860)		24412-E04	Greenland		Zackenberg	74.4667	-20.5667		M. Tiusanen & T. Roslin		MZH
Microplitis lugubris (Ruthe 1860)		24412-E05	Greenland		Zackenberg	74.4667	-20.5667		M. Tiusanen & T. Roslin		MZH
Microplitis lugubris (Ruthe 1860)		24412-E07	Greenland		Zackenberg	74.4667	-20.5667		M. Tiusanen & T. Roslin		MZH
Microplitis lugubris (Ruthe 1860)		24412-E08	Greenland		Zackenberg	74.4667	-20.5667		M. Tiusanen & T. Roslin		MZH
Microplitis lugubris (Ruthe 1860)		24412-E09	Greenland		Zackenberg	74.4667	-20.5667		M. Tiusanen & T. Roslin		MZH
Microplitis lugubris (Ruthe 1860)		24412-E12	Greenland		Zackenberg	74.4667	-20.5667		M. Tiusanen & T. Roslin		MZH
Microplitis lugubris (Ruthe 1860)		24412-F01	Greenland		Zackenberg	74.4667	-20.5667		M. Tiusanen & T. Roslin		MZH
Microplitis lugubris (Ruthe 1860)		24412-F02	Greenland		Zackenberg	74.4667	-20.5667		M. Tiusanen & T. Roslin		MZH
Microplitis lugubris (Ruthe 1860)		24412-F05	Greenland		Zackenberg	74.4667	-20.5667		M. Tiusanen & T. Roslin		MZH
Microplitis lugubris (Ruthe 1860)		24412-F06	Greenland		Zackenberg	74.4667	-20.5667		M. Tiusanen & T. Roslin		MZH
Microplitis lugubris (Ruthe 1860)		24412-F08	Greenland		Zackenberg	74.4667	-20.5667		M. Tiusanen & T. Roslin		MZH
Microplitis lugubris (Ruthe 1860)		24412-F09	Greenland		Zackenberg	74.4667	-20.5667		M. Tiusanen & T. Roslin		MZH
Microplitis lugubris (Ruthe 1860)		24412-F10	Greenland		Zackenberg	74.4667	-20.5667		M. Tiusanen & T. Roslin		MZH
Microplitis lugubris (Ruthe 1860)		24412-F12	Greenland		Zackenberg	74.4667	-20.5667		M. Tiusanen & T. Roslin		MZH
Microplitis lugubris (Ruthe 1860)		24412-G01	Greenland		Zackenberg	74.4667	-20.5667		M. Tiusanen & T. Roslin		MZH
Microplitis lugubris (Ruthe 1860)		24412-G03	Greenland		Zackenberg	74.4667	-20.5667		M. Tiusanen & T. Roslin		MZH
Microplitis lugubris (Ruthe 1860)		24412-G04	Greenland		Zackenberg	74.4667	-20.5667		M. Tiusanen & T. Roslin		MZH
Microplitis lugubris (Ruthe 1860)		24412-G05	Greenland		Zackenberg	74.4667	-20.5667		M. Tiusanen & T. Roslin		MZH
Microplitis lugubris (Ruthe 1860)		24412-G06	Greenland		Zackenberg	74.4667	-20.5667		M. Tiusanen & T. Roslin		MZH
Microplitis lugubris (Ruthe 1860)		24412-G07	Greenland		Zackenberg	74.4667	-20.5667		M. Tiusanen & T. Roslin		MZH
Microplitis lugubris (Ruthe 1860)		24412-G11	Greenland		Zackenberg	74.4667	-20.5667		M. Tiusanen & T. Roslin		MZH
Microplitis lugubris (Ruthe 1860)		24412-G12	Greenland		Zackenberg	74.4667	-20.5667		M. Tiusanen & T. Roslin		MZH
Microplitis lugubris (Ruthe 1860)		24412-H01	Greenland		Zackenberg	74.4667	-20.5667		M. Tiusanen & T. Roslin		MZH
Microplitis lugubris (Ruthe 1860)		24412-H02	Greenland		Zackenberg	74.4667	-20.5667		M. Tiusanen & T. Roslin		MZH
Microplitis lugubris (Ruthe 1860)		24412-H03	Greenland		Zackenberg	74.4667	-20.5667		M. Tiusanen & T. Roslin		MZH
Microplitis lugubris (Ruthe 1860)		24412-H04	Greenland		Zackenberg	74.4667	-20.5667		M. Tiusanen & T. Roslin		MZH
Microplitis lugubris (Ruthe 1860)		24412-H07	Greenland		Zackenberg	74.4667	-20.5667		M. Tiusanen & T. Roslin		MZH
Microplitis lugubris (Ruthe 1860)		24412-H09	Greenland		Zackenberg	74.4667	-20.5667		M. Tiusanen & T. Roslin		MZH
Microplitis lugubris (Ruthe 1860)		24412-H10	Greenland		Zackenberg	74.4667	-20.5667		M. Tiusanen & T. Roslin		MZH
Microplitis lugubris (Ruthe 1860)		24412-H11	Greenland		Zackenberg	74.4667	-20.5667		M. Tiusanen & T. Roslin		MZH
Microplitis lugubris (Ruthe 1860)		24421-A08	Greenland		Zackenberg	74.4667	-20.5667		M. Tiusanen & T. Roslin		MZH
Microplitis lugubris (Ruthe 1860)		24421-H08	Greenland		Zackenberg	74.4667	-20.5667		M. Tiusanen & T. Roslin		MZH
Microplitis lugubris (Ruthe 1860)		24423-A03	Greenland		Zackenberg	74.4667	-20.5667		M. Tiusanen & T. Roslin		MZH
Microplitis lugubris (Ruthe 1860)		24423-A09	Greenland		Zackenberg	74.4667	-20.5667		M. Tiusanen & T. Roslin		MZH
Microplitis lugubris (Ruthe 1860)		24453-C02	Greenland		Zackenberg	74.4667	-20.5667		M. Tiusanen & T. Roslin		MZH
Microplitis lugubris (Ruthe 1860)		24453-D11	Greenland		Zackenberg	74.4667	-20.5667		M. Tiusanen & T. Roslin		MZH
Microplitis lugubris (Ruthe 1860)		24453-H02	Greenland		Zackenberg	74.4667	-20.5667		M. Tiusanen & T. Roslin		MZH
Microplitis lugubris (Ruthe 1860)		24458-C01	Greenland		Zackenberg	74.4667	-20.5667		M. Tiusanen & T. Roslin		MZH
Microplitis lugubris (Ruthe 1860)		24458-F08	Greenland		Zackenberg	74.4667	-20.5667		M. Tiusanen & T. Roslin		MZH
Microplitis lugubris (Ruthe 1860)		24458-F09	Greenland		Zackenberg	74.4667	-20.5667		M. Tiusanen & T. Roslin		MZH
Microplitis lugubris (Ruthe 1860)		24458-G02	Greenland		Zackenberg	74.4667	-20.5667		M. Tiusanen & T. Roslin		MZH
Microplitis lugubris (Ruthe 1860)		24460-B12	Greenland		Zackenberg	74.4667	-20.5667		M. Tiusanen & T. Roslin		MZH
Microplitis lugubris (Ruthe 1860)		24460-C04	Greenland		Zackenberg	74.4667	-20.5667		M. Tiusanen & T. Roslin		MZH
Microplitis lugubris (Ruthe 1860)		24460-E01	Greenland		Zackenberg	74.4667	-20.5667		M. Tiusanen & T. Roslin		MZH
Microplitis lugubris (Ruthe 1860)		24471-G04	Greenland		Zackenberg	74.4667	-20.5667		M. Tiusanen & T. Roslin		MZH
Microplitis lugubris (Ruthe 1860)		24478-A01	Greenland		Zackenberg	74.4667	-20.5667		M. Tiusanen & T. Roslin		MZH
Microplitis lugubris (Ruthe 1860)		24478-A04	Greenland		Zackenberg	74.4667	-20.5667		M. Tiusanen & T. Roslin		MZH
Microplitis lugubris (Ruthe 1860)		24478-A07	Greenland		Zackenberg	74.4667	-20.5667		M. Tiusanen & T. Roslin		MZH
Microplitis lugubris (Ruthe 1860)		24478-A08	Greenland		Zackenberg	74.4667	-20.5667		M. Tiusanen & T. Roslin		MZH
Microplitis lugubris (Ruthe 1860)		24478-A09	Greenland		Zackenberg	74.4667	-20.5667		M. Tiusanen & T. Roslin		MZH
Microplitis lugubris (Ruthe 1860)		24478-A10	Greenland		Zackenberg	74.4667	-20.5667		M. Tiusanen & T. Roslin		MZH
Microplitis lugubris (Ruthe 1860)		24478-A11	Greenland		Zackenberg	74.4667	-20.5667		M. Tiusanen & T. Roslin		MZH
Microplitis lugubris (Ruthe 1860)		24478-A12	Greenland		Zackenberg	74.4667	-20.5667		M. Tiusanen & T. Roslin		MZH
Microplitis lugubris (Ruthe 1860)		24478-B01	Greenland		Zackenberg	74.4667	-20.5667		M. Tiusanen & T. Roslin		MZH
Microplitis lugubris (Ruthe 1860)		24478-B02	Greenland		Zackenberg	74.4667	-20.5667		M. Tiusanen & T. Roslin		MZH
Microplitis lugubris (Ruthe 1860)		24478-B03	Greenland		Zackenberg	74.4667	-20.5667		M. Tiusanen & T. Roslin		MZH
Microplitis lugubris (Ruthe 1860)		24478-B04	Greenland		Zackenberg	74.4667	-20.5667		M. Tiusanen & T. Roslin		MZH
Microplitis lugubris (Ruthe 1860)		24478-B05	Greenland		Zackenberg	74.4667	-20.5667		M. Tiusanen & T. Roslin		MZH
Microplitis lugubris (Ruthe 1860)		24478-B07	Greenland		Zackenberg	74.4667	-20.5667		M. Tiusanen & T. Roslin		MZH
Microplitis lugubris (Ruthe 1860)		24478-B08	Greenland		Zackenberg	74.4667	-20.5667		M. Tiusanen & T. Roslin		MZH
Microplitis lugubris (Ruthe 1860)		24478-B09	Greenland		Zackenberg	74.4667	-20.5667		M. Tiusanen & T. Roslin		MZH
Microplitis lugubris (Ruthe 1860)		24478-B10	Greenland		Zackenberg	74.4667	-20.5667		M. Tiusanen & T. Roslin		MZH
Microplitis lugubris (Ruthe 1860)		24478-B11	Greenland		Zackenberg	74.4667	-20.5667		M. Tiusanen & T. Roslin		MZH
Microplitis lugubris (Ruthe 1860)		24478-B12	Greenland		Zackenberg	74.4667	-20.5667		M. Tiusanen & T. Roslin		MZH
Microplitis lugubris (Ruthe 1860)		24478-C01	Greenland		Zackenberg	74.4667	-20.5667		M. Tiusanen & T. Roslin		MZH
Microplitis lugubris (Ruthe 1860)		24478-C02	Greenland		Zackenberg	74.4667	-20.5667		M. Tiusanen & T. Roslin		MZH
Microplitis lugubris (Ruthe 1860)		24478-C03	Greenland		Zackenberg	74.4667	-20.5667		M. Tiusanen & T. Roslin		MZH
Microplitis lugubris (Ruthe 1860)		24478-C04	Greenland		Zackenberg	74.4667	-20.5667		M. Tiusanen & T. Roslin		MZH
Microplitis lugubris (Ruthe 1860)		24478-C05	Greenland		Zackenberg	74.4667	-20.5667		M. Tiusanen & T. Roslin		MZH
Microplitis lugubris (Ruthe 1860)		24478-C06	Greenland		Zackenberg	74.4667	-20.5667		M. Tiusanen & T. Roslin		MZH
Microplitis lugubris (Ruthe 1860)		24478-C08	Greenland		Zackenberg	74.4667	-20.5667		M. Tiusanen & T. Roslin		MZH
Microplitis lugubris (Ruthe 1860)		24478-C09	Greenland		Zackenberg	74.4667	-20.5667		M. Tiusanen & T. Roslin		MZH
Microplitis lugubris (Ruthe 1860)		24478-C11	Greenland		Zackenberg	74.4667	-20.5667		M. Tiusanen & T. Roslin		MZH
Microplitis lugubris (Ruthe 1860)		24478-D02	Greenland		Zackenberg	74.4667	-20.5667		M. Tiusanen & T. Roslin		MZH
Microplitis lugubris (Ruthe 1860)		24478-D03	Greenland		Zackenberg	74.4667	-20.5667		M. Tiusanen & T. Roslin		MZH
Microplitis lugubris (Ruthe 1860)		24478-D04	Greenland		Zackenberg	74.4667	-20.5667		M. Tiusanen & T. Roslin		MZH
Microplitis lugubris (Ruthe 1860)		24478-D06	Greenland		Zackenberg	74.4667	-20.5667		M. Tiusanen & T. Roslin		MZH
Microplitis lugubris (Ruthe 1860)		24478-D08	Greenland		Zackenberg	74.4667	-20.5667		M. Tiusanen & T. Roslin		MZH
Microplitis lugubris (Ruthe 1860)		24478-D10	Greenland		Zackenberg	74.4667	-20.5667		M. Tiusanen & T. Roslin		MZH
Microplitis lugubris (Ruthe 1860)		24478-D12	Greenland		Zackenberg	74.4667	-20.5667		M. Tiusanen & T. Roslin		MZH
Microplitis lugubris (Ruthe 1860)		24478-E03	Greenland		Zackenberg	74.4667	-20.5667		M. Tiusanen & T. Roslin		MZH
Microplitis lugubris (Ruthe 1860)		24478-E04	Greenland		Zackenberg	74.4667	-20.5667		M. Tiusanen & T. Roslin		MZH
Microplitis lugubris (Ruthe 1860)		24478-E05	Greenland		Zackenberg	74.4667	-20.5667		M. Tiusanen & T. Roslin		MZH
Microplitis lugubris (Ruthe 1860)		24478-E08	Greenland		Zackenberg	74.4667	-20.5667		M. Tiusanen & T. Roslin		MZH
Microplitis lugubris (Ruthe 1860)		24478-E09	Greenland		Zackenberg	74.4667	-20.5667		M. Tiusanen & T. Roslin		MZH
Microplitis lugubris (Ruthe 1860)		24478-E11	Greenland		Zackenberg	74.4667	-20.5667		M. Tiusanen & T. Roslin		MZH
Microplitis lugubris (Ruthe 1860)		24478-F01	Greenland		Zackenberg	74.4667	-20.5667		M. Tiusanen & T. Roslin		MZH
Microplitis lugubris (Ruthe 1860)		24478-F03	Greenland		Zackenberg	74.4667	-20.5667		M. Tiusanen & T. Roslin		MZH
Microplitis lugubris (Ruthe 1860)		24478-F04	Greenland		Zackenberg	74.4667	-20.5667		M. Tiusanen & T. Roslin		MZH
Microplitis lugubris (Ruthe 1860)		24478-F05	Greenland		Zackenberg	74.4667	-20.5667		M. Tiusanen & T. Roslin		MZH
Microplitis lugubris (Ruthe 1860)		24478-F06	Greenland		Zackenberg	74.4667	-20.5667		M. Tiusanen & T. Roslin		MZH
Microplitis lugubris (Ruthe 1860)		24478-F07	Greenland		Zackenberg	74.4667	-20.5667		M. Tiusanen & T. Roslin		MZH
Microplitis lugubris (Ruthe 1860)		24478-F08	Greenland		Zackenberg	74.4667	-20.5667		M. Tiusanen & T. Roslin		MZH
Microplitis lugubris (Ruthe 1860)		24478-F09	Greenland		Zackenberg	74.4667	-20.5667		M. Tiusanen & T. Roslin		MZH
Microplitis lugubris (Ruthe 1860)		24478-F10	Greenland		Zackenberg	74.4667	-20.5667		M. Tiusanen & T. Roslin		MZH
Microplitis lugubris (Ruthe 1860)		24478-F11	Greenland		Zackenberg	74.4667	-20.5667		M. Tiusanen & T. Roslin		MZH
Microplitis lugubris (Ruthe 1860)		24478-F12	Greenland		Zackenberg	74.4667	-20.5667		M. Tiusanen & T. Roslin		MZH
Microplitis lugubris (Ruthe 1860)		24478-G01	Greenland		Zackenberg	74.4667	-20.5667		M. Tiusanen & T. Roslin		MZH
Microplitis lugubris (Ruthe 1860)		24478-G07	Greenland		Zackenberg	74.4667	-20.5667		M. Tiusanen & T. Roslin		MZH
Microplitis lugubris (Ruthe 1860)		24478-G10	Greenland		Zackenberg	74.4667	-20.5667		M. Tiusanen & T. Roslin		MZH
Microplitis lugubris (Ruthe 1860)		24478-G11	Greenland		Zackenberg	74.4667	-20.5667		M. Tiusanen & T. Roslin		MZH
Microplitis lugubris (Ruthe 1860)		24478-H03	Greenland		Zackenberg	74.4667	-20.5667		M. Tiusanen & T. Roslin		MZH
Microplitis lugubris (Ruthe 1860)		24478-H04	Greenland		Zackenberg	74.4667	-20.5667		M. Tiusanen & T. Roslin		MZH
Microplitis lugubris (Ruthe 1860)		24478-H05	Greenland		Zackenberg	74.4667	-20.5667		M. Tiusanen & T. Roslin		MZH
Microplitis lugubris (Ruthe 1860)		24478-H10	Greenland		Zackenberg	74.4667	-20.5667		M. Tiusanen & T. Roslin		MZH
Microplitis lugubris (Ruthe 1860)		24481-A02	Greenland		Zackenberg	74.4667	-20.5667		M. Tiusanen & T. Roslin		MZH
Microplitis lugubris (Ruthe 1860)		24481-A03	Greenland		Zackenberg	74.4667	-20.5667		M. Tiusanen & T. Roslin		MZH
Microplitis lugubris (Ruthe 1860)		24481-A04	Greenland		Zackenberg	74.4667	-20.5667		M. Tiusanen & T. Roslin		MZH
Microplitis lugubris (Ruthe 1860)		24481-A07	Greenland		Zackenberg	74.4667	-20.5667		M. Tiusanen & T. Roslin		MZH
Microplitis lugubris (Ruthe 1860)		24481-A08	Greenland		Zackenberg	74.4667	-20.5667		M. Tiusanen & T. Roslin		MZH
Microplitis lugubris (Ruthe 1860)		24481-A09	Greenland		Zackenberg	74.4667	-20.5667		M. Tiusanen & T. Roslin		MZH
Microplitis lugubris (Ruthe 1860)		24481-A10	Greenland		Zackenberg	74.4667	-20.5667		M. Tiusanen & T. Roslin		MZH
Microplitis lugubris (Ruthe 1860)		24481-A12	Greenland		Zackenberg	74.4667	-20.5667		M. Tiusanen & T. Roslin		MZH
Microplitis lugubris (Ruthe 1860)		24481-B01	Greenland		Zackenberg	74.4667	-20.5667		M. Tiusanen & T. Roslin		MZH
Microplitis lugubris (Ruthe 1860)		24481-B02	Greenland		Zackenberg	74.4667	-20.5667		M. Tiusanen & T. Roslin		MZH
Microplitis lugubris (Ruthe 1860)		24481-B03	Greenland		Zackenberg	74.4667	-20.5667		M. Tiusanen & T. Roslin		MZH
Microplitis lugubris (Ruthe 1860)		24481-B04	Greenland		Zackenberg	74.4667	-20.5667		M. Tiusanen & T. Roslin		MZH
Microplitis lugubris (Ruthe 1860)		24481-B05	Greenland		Zackenberg	74.4667	-20.5667		M. Tiusanen & T. Roslin		MZH
Microplitis lugubris (Ruthe 1860)		24481-B06	Greenland		Zackenberg	74.4667	-20.5667		M. Tiusanen & T. Roslin		MZH
Microplitis lugubris (Ruthe 1860)		24481-B07	Greenland		Zackenberg	74.4667	-20.5667		M. Tiusanen & T. Roslin		MZH
Microplitis lugubris (Ruthe 1860)		24481-B09	Greenland		Zackenberg	74.4667	-20.5667		M. Tiusanen & T. Roslin		MZH
Microplitis lugubris (Ruthe 1860)		24481-B11	Greenland		Zackenberg	74.4667	-20.5667		M. Tiusanen & T. Roslin		MZH
Microplitis lugubris (Ruthe 1860)		24481-B12	Greenland		Zackenberg	74.4667	-20.5667		M. Tiusanen & T. Roslin		MZH
Microplitis lugubris (Ruthe 1860)		24481-C02	Greenland		Zackenberg	74.4667	-20.5667		M. Tiusanen & T. Roslin		MZH
Microplitis lugubris (Ruthe 1860)		24481-C03	Greenland		Zackenberg	74.4667	-20.5667		M. Tiusanen & T. Roslin		MZH
Microplitis lugubris (Ruthe 1860)		24481-C04	Greenland		Zackenberg	74.4667	-20.5667		M. Tiusanen & T. Roslin		MZH
Microplitis lugubris (Ruthe 1860)		24481-C05	Greenland		Zackenberg	74.4667	-20.5667		M. Tiusanen & T. Roslin		MZH
Microplitis lugubris (Ruthe 1860)		24481-C06	Greenland		Zackenberg	74.4667	-20.5667		M. Tiusanen & T. Roslin		MZH
Microplitis lugubris (Ruthe 1860)		24481-C07	Greenland		Zackenberg	74.4667	-20.5667		M. Tiusanen & T. Roslin		MZH
Microplitis lugubris (Ruthe 1860)		24481-C08	Greenland		Zackenberg	74.4667	-20.5667		M. Tiusanen & T. Roslin		MZH
Microplitis lugubris (Ruthe 1860)		24481-C09	Greenland		Zackenberg	74.4667	-20.5667		M. Tiusanen & T. Roslin		MZH
Microplitis lugubris (Ruthe 1860)		24481-C11	Greenland		Zackenberg	74.4667	-20.5667		M. Tiusanen & T. Roslin		MZH
Microplitis lugubris (Ruthe 1860)		24481-D01	Greenland		Zackenberg	74.4667	-20.5667		M. Tiusanen & T. Roslin		MZH
Microplitis lugubris (Ruthe 1860)		24481-D02	Greenland		Zackenberg	74.4667	-20.5667		M. Tiusanen & T. Roslin		MZH
Microplitis lugubris (Ruthe 1860)		24481-D03	Greenland		Zackenberg	74.4667	-20.5667		M. Tiusanen & T. Roslin		MZH
Microplitis lugubris (Ruthe 1860)		24481-D04	Greenland		Zackenberg	74.4667	-20.5667		M. Tiusanen & T. Roslin		MZH
Microplitis lugubris (Ruthe 1860)		24481-D05	Greenland		Zackenberg	74.4667	-20.5667		M. Tiusanen & T. Roslin		MZH
Microplitis lugubris (Ruthe 1860)		24481-D06	Greenland		Zackenberg	74.4667	-20.5667		M. Tiusanen & T. Roslin		MZH
Microplitis lugubris (Ruthe 1860)		24481-D08	Greenland		Zackenberg	74.4667	-20.5667		M. Tiusanen & T. Roslin		MZH
Microplitis lugubris (Ruthe 1860)		24481-D09	Greenland		Zackenberg	74.4667	-20.5667		M. Tiusanen & T. Roslin		MZH
Microplitis lugubris (Ruthe 1860)		24481-D10	Greenland		Zackenberg	74.4667	-20.5667		M. Tiusanen & T. Roslin		MZH
Microplitis lugubris (Ruthe 1860)		24481-D11	Greenland		Zackenberg	74.4667	-20.5667		M. Tiusanen & T. Roslin		MZH
Microplitis lugubris (Ruthe 1860)		24481-D12	Greenland		Zackenberg	74.4667	-20.5667		M. Tiusanen & T. Roslin		MZH
Microplitis lugubris (Ruthe 1860)		24481-E02	Greenland		Zackenberg	74.4667	-20.5667		M. Tiusanen & T. Roslin		MZH
Microplitis lugubris (Ruthe 1860)		24481-E04	Greenland		Zackenberg	74.4667	-20.5667		M. Tiusanen & T. Roslin		MZH
Microplitis lugubris (Ruthe 1860)		24481-E05	Greenland		Zackenberg	74.4667	-20.5667		M. Tiusanen & T. Roslin		MZH
Microplitis lugubris (Ruthe 1860)		24481-E06	Greenland		Zackenberg	74.4667	-20.5667		M. Tiusanen & T. Roslin		MZH
Microplitis lugubris (Ruthe 1860)		24481-E08	Greenland		Zackenberg	74.4667	-20.5667		M. Tiusanen & T. Roslin		MZH
Microplitis lugubris (Ruthe 1860)		24481-E09	Greenland		Zackenberg	74.4667	-20.5667		M. Tiusanen & T. Roslin		MZH
Microplitis lugubris (Ruthe 1860)		24481-E10	Greenland		Zackenberg	74.4667	-20.5667		M. Tiusanen & T. Roslin		MZH
Microplitis lugubris (Ruthe 1860)		24481-E11	Greenland		Zackenberg	74.4667	-20.5667		M. Tiusanen & T. Roslin		MZH
Microplitis lugubris (Ruthe 1860)		24481-E12	Greenland		Zackenberg	74.4667	-20.5667		M. Tiusanen & T. Roslin		MZH
Microplitis lugubris (Ruthe 1860)		24481-F01	Greenland		Zackenberg	74.4667	-20.5667		M. Tiusanen & T. Roslin		MZH
Microplitis lugubris (Ruthe 1860)		24481-F02	Greenland		Zackenberg	74.4667	-20.5667		M. Tiusanen & T. Roslin		MZH
Microplitis lugubris (Ruthe 1860)		24481-F03	Greenland		Zackenberg	74.4667	-20.5667		M. Tiusanen & T. Roslin		MZH
Microplitis lugubris (Ruthe 1860)		24481-F04	Greenland		Zackenberg	74.4667	-20.5667		M. Tiusanen & T. Roslin		MZH
Microplitis lugubris (Ruthe 1860)		24481-F05	Greenland		Zackenberg	74.4667	-20.5667		M. Tiusanen & T. Roslin		MZH
Microplitis lugubris (Ruthe 1860)		24481-F06	Greenland		Zackenberg	74.4667	-20.5667		M. Tiusanen & T. Roslin		MZH
Microplitis lugubris (Ruthe 1860)		24481-F07	Greenland		Zackenberg	74.4667	-20.5667		M. Tiusanen & T. Roslin		MZH
Microplitis lugubris (Ruthe 1860)		24481-F08	Greenland		Zackenberg	74.4667	-20.5667		M. Tiusanen & T. Roslin		MZH
Microplitis lugubris (Ruthe 1860)		24481-F10	Greenland		Zackenberg	74.4667	-20.5667		M. Tiusanen & T. Roslin		MZH
Microplitis lugubris (Ruthe 1860)		24481-F11	Greenland		Zackenberg	74.4667	-20.5667		M. Tiusanen & T. Roslin		MZH
Microplitis lugubris (Ruthe 1860)		24481-G03	Greenland		Zackenberg	74.4667	-20.5667		M. Tiusanen & T. Roslin		MZH
Microplitis lugubris (Ruthe 1860)		24481-G04	Greenland		Zackenberg	74.4667	-20.5667		M. Tiusanen & T. Roslin		MZH
Microplitis lugubris (Ruthe 1860)		24481-G07	Greenland		Zackenberg	74.4667	-20.5667		M. Tiusanen & T. Roslin		MZH
Microplitis lugubris (Ruthe 1860)		24481-G08	Greenland		Zackenberg	74.4667	-20.5667		M. Tiusanen & T. Roslin		MZH
Microplitis lugubris (Ruthe 1860)		24481-G09	Greenland		Zackenberg	74.4667	-20.5667		M. Tiusanen & T. Roslin		MZH
Microplitis lugubris (Ruthe 1860)		24481-G10	Greenland		Zackenberg	74.4667	-20.5667		M. Tiusanen & T. Roslin		MZH
Microplitis lugubris (Ruthe 1860)		24481-G11	Greenland		Zackenberg	74.4667	-20.5667		M. Tiusanen & T. Roslin		MZH
Microplitis lugubris (Ruthe 1860)		24481-G12	Greenland		Zackenberg	74.4667	-20.5667		M. Tiusanen & T. Roslin		MZH
Microplitis lugubris (Ruthe 1860)		24481-H02	Greenland		Zackenberg	74.4667	-20.5667		M. Tiusanen & T. Roslin		MZH
Microplitis lugubris (Ruthe 1860)		24481-H04	Greenland		Zackenberg	74.4667	-20.5667		M. Tiusanen & T. Roslin		MZH
Microplitis lugubris (Ruthe 1860)		24481-H05	Greenland		Zackenberg	74.4667	-20.5667		M. Tiusanen & T. Roslin		MZH
Microplitis lugubris (Ruthe 1860)		24481-H07	Greenland		Zackenberg	74.4667	-20.5667		M. Tiusanen & T. Roslin		MZH
Microplitis lugubris (Ruthe 1860)		24481-H08	Greenland		Zackenberg	74.4667	-20.5667		M. Tiusanen & T. Roslin		MZH
Microplitis lugubris (Ruthe 1860)		24481-H09	Greenland		Zackenberg	74.4667	-20.5667		M. Tiusanen & T. Roslin		MZH
Microplitis lugubris (Ruthe 1860)		24481-H10	Greenland		Zackenberg	74.4667	-20.5667		M. Tiusanen & T. Roslin		MZH
Microplitis lugubris (Ruthe 1860)		24481-H11	Greenland		Zackenberg	74.4667	-20.5667		M. Tiusanen & T. Roslin		MZH
Microplitis lugubris (Ruthe 1860)		24492-A02	Greenland		Zackenberg	74.4667	-20.5667		M. Tiusanen & T. Roslin		MZH
Microplitis lugubris (Ruthe 1860)		24492-A05	Greenland		Zackenberg	74.4667	-20.5667		M. Tiusanen & T. Roslin		MZH
Microplitis lugubris (Ruthe 1860)		24492-A08	Greenland		Zackenberg	74.4667	-20.5667		M. Tiusanen & T. Roslin		MZH
Microplitis lugubris (Ruthe 1860)		24492-A12	Greenland		Zackenberg	74.4667	-20.5667		M. Tiusanen & T. Roslin		MZH
Microplitis lugubris (Ruthe 1860)		24492-B04	Greenland		Zackenberg	74.4667	-20.5667		M. Tiusanen & T. Roslin		MZH
Microplitis lugubris (Ruthe 1860)		24492-B05	Greenland		Zackenberg	74.4667	-20.5667		M. Tiusanen & T. Roslin		MZH
Microplitis lugubris (Ruthe 1860)		24492-B08	Greenland		Zackenberg	74.4667	-20.5667		M. Tiusanen & T. Roslin		MZH
Microplitis lugubris (Ruthe 1860)		24492-B09	Greenland		Zackenberg	74.4667	-20.5667		M. Tiusanen & T. Roslin		MZH
Microplitis lugubris (Ruthe 1860)		24492-B10	Greenland		Zackenberg	74.4667	-20.5667		M. Tiusanen & T. Roslin		MZH
Microplitis lugubris (Ruthe 1860)		24492-B11	Greenland		Zackenberg	74.4667	-20.5667		M. Tiusanen & T. Roslin		MZH
Microplitis lugubris (Ruthe 1860)		24492-B12	Greenland		Zackenberg	74.4667	-20.5667		M. Tiusanen & T. Roslin		MZH
Microplitis lugubris (Ruthe 1860)		24492-C02	Greenland		Zackenberg	74.4667	-20.5667		M. Tiusanen & T. Roslin		MZH
Microplitis lugubris (Ruthe 1860)		24492-C07	Greenland		Zackenberg	74.4667	-20.5667		M. Tiusanen & T. Roslin		MZH
Microplitis lugubris (Ruthe 1860)		24492-C08	Greenland		Zackenberg	74.4667	-20.5667		M. Tiusanen & T. Roslin		MZH
Microplitis lugubris (Ruthe 1860)		24492-D01	Greenland		Zackenberg	74.4667	-20.5667		M. Tiusanen & T. Roslin		MZH
Microplitis lugubris (Ruthe 1860)		24492-D10	Greenland		Zackenberg	74.4667	-20.5667		M. Tiusanen & T. Roslin		MZH
Microplitis lugubris (Ruthe 1860)		24492-D11	Greenland		Zackenberg	74.4667	-20.5667		M. Tiusanen & T. Roslin		MZH
Microplitis lugubris (Ruthe 1860)		24492-E12	Greenland		Zackenberg	74.4667	-20.5667		M. Tiusanen & T. Roslin		MZH
Microplitis lugubris (Ruthe 1860)		24492-F01	Greenland		Zackenberg	74.4667	-20.5667		M. Tiusanen & T. Roslin		MZH
Microplitis lugubris (Ruthe 1860)		24492-F02	Greenland		Zackenberg	74.4667	-20.5667		M. Tiusanen & T. Roslin		MZH
Microplitis lugubris (Ruthe 1860)		24492-F04	Greenland		Zackenberg	74.4667	-20.5667		M. Tiusanen & T. Roslin		MZH
Microplitis lugubris (Ruthe 1860)		24492-F05	Greenland		Zackenberg	74.4667	-20.5667		M. Tiusanen & T. Roslin		MZH
Microplitis lugubris (Ruthe 1860)		24492-F06	Greenland		Zackenberg	74.4667	-20.5667		M. Tiusanen & T. Roslin		MZH
Microplitis lugubris (Ruthe 1860)		24492-F07	Greenland		Zackenberg	74.4667	-20.5667		M. Tiusanen & T. Roslin		MZH
Microplitis lugubris (Ruthe 1860)		24492-F09	Greenland		Zackenberg	74.4667	-20.5667		M. Tiusanen & T. Roslin		MZH
Microplitis lugubris (Ruthe 1860)		24492-F10	Greenland		Zackenberg	74.4667	-20.5667		M. Tiusanen & T. Roslin		MZH
Microplitis lugubris (Ruthe 1860)		24492-G03	Greenland		Zackenberg	74.4667	-20.5667		M. Tiusanen & T. Roslin		MZH
Microplitis lugubris (Ruthe 1860)		24492-G04	Greenland		Zackenberg	74.4667	-20.5667		M. Tiusanen & T. Roslin		MZH
Microplitis lugubris (Ruthe 1860)		24492-G06	Greenland		Zackenberg	74.4667	-20.5667		M. Tiusanen & T. Roslin		MZH
Microplitis lugubris (Ruthe 1860)		24492-G07	Greenland		Zackenberg	74.4667	-20.5667		M. Tiusanen & T. Roslin		MZH
Microplitis lugubris (Ruthe 1860)		24492-G08	Greenland		Zackenberg	74.4667	-20.5667		M. Tiusanen & T. Roslin		MZH
Microplitis lugubris (Ruthe 1860)		24492-G11	Greenland		Zackenberg	74.4667	-20.5667		M. Tiusanen & T. Roslin		MZH
Microplitis lugubris (Ruthe 1860)		24492-G12	Greenland		Zackenberg	74.4667	-20.5667		M. Tiusanen & T. Roslin		MZH
Microplitis lugubris (Ruthe 1860)		24492-H01	Greenland		Zackenberg	74.4667	-20.5667		M. Tiusanen & T. Roslin		MZH
Microplitis lugubris (Ruthe 1860)		24492-H02	Greenland		Zackenberg	74.4667	-20.5667		M. Tiusanen & T. Roslin		MZH
Microplitis lugubris (Ruthe 1860)		24492-H03	Greenland		Zackenberg	74.4667	-20.5667		M. Tiusanen & T. Roslin		MZH
Microplitis lugubris (Ruthe 1860)		24492-H04	Greenland		Zackenberg	74.4667	-20.5667		M. Tiusanen & T. Roslin		MZH
Microplitis lugubris (Ruthe 1860)		24492-H05	Greenland		Zackenberg	74.4667	-20.5667		M. Tiusanen & T. Roslin		MZH
Microplitis lugubris (Ruthe 1860)		24492-H06	Greenland		Zackenberg	74.4667	-20.5667		M. Tiusanen & T. Roslin		MZH
Microplitis lugubris (Ruthe 1860)		24492-H07	Greenland		Zackenberg	74.4667	-20.5667		M. Tiusanen & T. Roslin		MZH
Microplitis lugubris (Ruthe 1860)		24492-H08	Greenland		Zackenberg	74.4667	-20.5667		M. Tiusanen & T. Roslin		MZH
Microplitis lugubris (Ruthe 1860)		24492-H09	Greenland		Zackenberg	74.4667	-20.5667		M. Tiusanen & T. Roslin		MZH
Microplitis lugubris (Ruthe 1860)		24492-H10	Greenland		Zackenberg	74.4667	-20.5667		M. Tiusanen & T. Roslin		MZH
Microplitis lugubris (Ruthe 1860)		24492-H11	Greenland		Zackenberg	74.4667	-20.5667		M. Tiusanen & T. Roslin		MZH
Microplitis lugubris (Ruthe 1860)		24493-A02	Greenland		Zackenberg	74.4667	-20.5667		M. Tiusanen & T. Roslin		MZH
Microplitis lugubris (Ruthe 1860)		24493-B04	Greenland		Zackenberg	74.4667	-20.5667		M. Tiusanen & T. Roslin		MZH
Microplitis lugubris (Ruthe 1860)		24493-C04	Greenland		Zackenberg	74.4667	-20.5667		M. Tiusanen & T. Roslin		MZH
Microplitis lugubris (Ruthe 1860)		24493-E02	Greenland		Zackenberg	74.4667	-20.5667		M. Tiusanen & T. Roslin		MZH
Microplitis lugubris (Ruthe 1860)		24493-E06	Greenland		Zackenberg	74.4667	-20.5667		M. Tiusanen & T. Roslin		MZH
Microplitis lugubris (Ruthe 1860)		24493-H08	Greenland		Zackenberg	74.4667	-20.5667		M. Tiusanen & T. Roslin		MZH
Microplitis lugubris (Ruthe 1860)		24493-H09	Greenland		Zackenberg	74.4667	-20.5667		M. Tiusanen & T. Roslin		MZH
Microplitis lugubris (Ruthe 1860)		24495-D08	Greenland		Zackenberg	74.4667	-20.5667		M. Tiusanen & T. Roslin		MZH
Microplitis lugubris (Ruthe 1860)		24495-G07	Greenland		Zackenberg	74.4667	-20.5667		M. Tiusanen & T. Roslin		MZH
Microplitis lugubris (Ruthe 1860)		24495-G09	Greenland		Zackenberg	74.4667	-20.5667		M. Tiusanen & T. Roslin		MZH
Microplitis lugubris (Ruthe 1860)		24521-A09	Greenland		Zackenberg	74.4667	-20.5667		M. Tiusanen & T. Roslin		MZH
Microplitis lugubris (Ruthe 1860)		24521-B03	Greenland		Zackenberg	74.4667	-20.5667		M. Tiusanen & T. Roslin		MZH
Microplitis lugubris (Ruthe 1860)		24523-A01	Greenland		Zackenberg	74.4667	-20.5667		M. Tiusanen & T. Roslin		MZH
Microplitis lugubris (Ruthe 1860)		24523-A05	Greenland		Zackenberg	74.4667	-20.5667		M. Tiusanen & T. Roslin		MZH
Microplitis lugubris (Ruthe 1860)		24523-A06	Greenland		Zackenberg	74.4667	-20.5667		M. Tiusanen & T. Roslin		MZH
Microplitis lugubris (Ruthe 1860)		24523-A08	Greenland		Zackenberg	74.4667	-20.5667		M. Tiusanen & T. Roslin		MZH
Microplitis lugubris (Ruthe 1860)		24523-A09	Greenland		Zackenberg	74.4667	-20.5667		M. Tiusanen & T. Roslin		MZH
Microplitis lugubris (Ruthe 1860)		24523-A10	Greenland		Zackenberg	74.4667	-20.5667		M. Tiusanen & T. Roslin		MZH
Microplitis lugubris (Ruthe 1860)		24523-A11	Greenland		Zackenberg	74.4667	-20.5667		M. Tiusanen & T. Roslin		MZH
Microplitis lugubris (Ruthe 1860)		24523-B02	Greenland		Zackenberg	74.4667	-20.5667		M. Tiusanen & T. Roslin		MZH
Microplitis lugubris (Ruthe 1860)		24523-B03	Greenland		Zackenberg	74.4667	-20.5667		M. Tiusanen & T. Roslin		MZH
Microplitis lugubris (Ruthe 1860)		24523-B04	Greenland		Zackenberg	74.4667	-20.5667		M. Tiusanen & T. Roslin		MZH
Microplitis lugubris (Ruthe 1860)		24523-B05	Greenland		Zackenberg	74.4667	-20.5667		M. Tiusanen & T. Roslin		MZH
Microplitis lugubris (Ruthe 1860)		24523-B06	Greenland		Zackenberg	74.4667	-20.5667		M. Tiusanen & T. Roslin		MZH
Microplitis lugubris (Ruthe 1860)		24523-B07	Greenland		Zackenberg	74.4667	-20.5667		M. Tiusanen & T. Roslin		MZH
Microplitis lugubris (Ruthe 1860)		24523-B08	Greenland		Zackenberg	74.4667	-20.5667		M. Tiusanen & T. Roslin		MZH
Microplitis lugubris (Ruthe 1860)		24523-B09	Greenland		Zackenberg	74.4667	-20.5667		M. Tiusanen & T. Roslin		MZH
Microplitis lugubris (Ruthe 1860)		24523-B10	Greenland		Zackenberg	74.4667	-20.5667		M. Tiusanen & T. Roslin		MZH
Microplitis lugubris (Ruthe 1860)		24523-B11	Greenland		Zackenberg	74.4667	-20.5667		M. Tiusanen & T. Roslin		MZH
Microplitis lugubris (Ruthe 1860)		24523-B12	Greenland		Zackenberg	74.4667	-20.5667		M. Tiusanen & T. Roslin		MZH
Microplitis lugubris (Ruthe 1860)		24523-C02	Greenland		Zackenberg	74.4667	-20.5667		M. Tiusanen & T. Roslin		MZH
Microplitis lugubris (Ruthe 1860)		24523-C03	Greenland		Zackenberg	74.4667	-20.5667		M. Tiusanen & T. Roslin		MZH
Microplitis lugubris (Ruthe 1860)		24523-C05	Greenland		Zackenberg	74.4667	-20.5667		M. Tiusanen & T. Roslin		MZH
Microplitis lugubris (Ruthe 1860)		24523-C06	Greenland		Zackenberg	74.4667	-20.5667		M. Tiusanen & T. Roslin		MZH
Microplitis lugubris (Ruthe 1860)		24523-C07	Greenland		Zackenberg	74.4667	-20.5667		M. Tiusanen & T. Roslin		MZH
Microplitis lugubris (Ruthe 1860)		24523-C08	Greenland		Zackenberg	74.4667	-20.5667		M. Tiusanen & T. Roslin		MZH
Microplitis lugubris (Ruthe 1860)		24523-C09	Greenland		Zackenberg	74.4667	-20.5667		M. Tiusanen & T. Roslin		MZH
Microplitis lugubris (Ruthe 1860)		24523-C10	Greenland		Zackenberg	74.4667	-20.5667		M. Tiusanen & T. Roslin		MZH
Microplitis lugubris (Ruthe 1860)		24523-C11	Greenland		Zackenberg	74.4667	-20.5667		M. Tiusanen & T. Roslin		MZH
Microplitis lugubris (Ruthe 1860)		24523-D02	Greenland		Zackenberg	74.4667	-20.5667		M. Tiusanen & T. Roslin		MZH
Microplitis lugubris (Ruthe 1860)		24523-D05	Greenland		Zackenberg	74.4667	-20.5667		M. Tiusanen & T. Roslin		MZH
Microplitis lugubris (Ruthe 1860)		24523-D07	Greenland		Zackenberg	74.4667	-20.5667		M. Tiusanen & T. Roslin		MZH
Microplitis lugubris (Ruthe 1860)		24523-D08	Greenland		Zackenberg	74.4667	-20.5667		M. Tiusanen & T. Roslin		MZH
Microplitis lugubris (Ruthe 1860)		24543-G02	Greenland		Zackenberg	74.4667	-20.5667		M. Tiusanen & T. Roslin		MZH
Microplitis lugubris (Ruthe 1860)		24545-A04	Greenland		Zackenberg	74.4667	-20.5667		M. Tiusanen & T. Roslin		MZH
[truncated: 184 more rows]
